# Supplementary material for: Study protocol for controlled human infection for penicillin G against Streptococcus pyogenes: a double-blinded, placebo-controlled, randomised trial to determine the minimum concentration required to prevent experimental pharyngitis (the CHIPS trial)
Source: PubMed Central journal article supplement — BMJ Open. 2022 Dec 8;12(12):e064022. doi: 10.1136/bmjopen-2022-064022 (PMC9743388; doi:10.1136/bmjopen-2022-064022), 2022-12-08
Supplement: bmjopen-2022-064022.draft_revisions.pdf [file bmjopen-2022-064022.draft_revisions.pdf]

# BMJ Open

BMJ Open is committed to open peer review. As part of this commitment we make the peer review history of every article we publish publicly available.

When an article is published we post the peer reviewers' comments and the authors' responses online. We also post the versions of the paper that were used during peer review. These are the versions that the peer review comments apply to.

The versions of the paper that follow are the versions that were submitted during the peer review process. They are not the versions of record or the final published versions. They should not be cited or distributed as the published version of this manuscript.

BMJ Open is an open access journal and the full, final, typeset and author-corrected version of record of the manuscript is available on our site with no access controls, subscription charges or pay-per-view fees (<http://bmjopen.bmj.com>).

If you have any questions on BMJ Open's open peer review process please email [info.bmjopen@bmj.com](mailto:info.bmjopen@bmj.com)

# BMJ Open

**Study Protocol for Controlled human infection for penicillin G against Streptococcus pyogenes: a double blinded, placebo controlled, randomised trial to determine the minimum concentration required to prevent experimental pharyngitis (The CHIPS trial)**

|                               |                                                                                                                                                                                                                                                                                                                                                                                                                                                                                                                                                                                                                                                                                                                                                                                                                                                                                                                                                                                                                                                                                                                                                                                                                                                                                                                                                   |
|-------------------------------|---------------------------------------------------------------------------------------------------------------------------------------------------------------------------------------------------------------------------------------------------------------------------------------------------------------------------------------------------------------------------------------------------------------------------------------------------------------------------------------------------------------------------------------------------------------------------------------------------------------------------------------------------------------------------------------------------------------------------------------------------------------------------------------------------------------------------------------------------------------------------------------------------------------------------------------------------------------------------------------------------------------------------------------------------------------------------------------------------------------------------------------------------------------------------------------------------------------------------------------------------------------------------------------------------------------------------------------------------|
| Journal:                      | <i>BMJ Open</i>                                                                                                                                                                                                                                                                                                                                                                                                                                                                                                                                                                                                                                                                                                                                                                                                                                                                                                                                                                                                                                                                                                                                                                                                                                                                                                                                   |
| Manuscript ID                 | bmjopen-2022-064022                                                                                                                                                                                                                                                                                                                                                                                                                                                                                                                                                                                                                                                                                                                                                                                                                                                                                                                                                                                                                                                                                                                                                                                                                                                                                                                               |
| Article Type:                 | Protocol                                                                                                                                                                                                                                                                                                                                                                                                                                                                                                                                                                                                                                                                                                                                                                                                                                                                                                                                                                                                                                                                                                                                                                                                                                                                                                                                          |
| Date Submitted by the Author: | 04-May-2022                                                                                                                                                                                                                                                                                                                                                                                                                                                                                                                                                                                                                                                                                                                                                                                                                                                                                                                                                                                                                                                                                                                                                                                                                                                                                                                                       |
| Complete List of Authors:     | Hla, Thel; Telethon Kids Institute, Westfarmer's Centre of Vaccines and Infectious Diseases; University of Western Australia<br>Osowicki, Joshua; Murdoch Children's Research Institute; University of Melbourne, Department of Paediatrics<br>Salman, Sam; University of Western Australia; Telethon Kids Institute, Westfarmer's Centre of Vaccines and Infectious Diseases<br>Batty, Kevin; Curtin University,<br>Marsh, Julie; Telethon Kids Institute, Westfarmer's Centre of Vaccines and Infectious Diseases<br>Kado, Joseph; Telethon Kids Institute, Westfarmer's Centre of Vaccines and Infectious Diseases<br>Barr, Renae; Telethon Kids Institute, Westfarmer's Centre of Vaccines and Infectious Diseases<br>Enkel, Stephanie L.; Telethon Kids Institute, Westfarmer's Centre of Vaccines and Infectious Diseases<br>Snelling, Thomas; The University of Sydney School of Public Health<br>McCarthy, James; University of Melbourne<br>Steer, Andrew C.; Murdoch Children's Research Institute; University of Melbourne, Department of Paediatrics<br>Carapetis, Jonathan; Telethon Kids Institute, Westfarmer's Centre of Vaccines and Infectious Diseases; University of Western Australia<br>Manning, Laurens; Telethon Kids Institute, Westfarmer's Centre of Vaccines and Infectious Diseases; University of Western Australia |
| Keywords:                     | INFECTIOUS DISEASES, MICROBIOLOGY, CLINICAL PHARMACOLOGY                                                                                                                                                                                                                                                                                                                                                                                                                                                                                                                                                                                                                                                                                                                                                                                                                                                                                                                                                                                                                                                                                                                                                                                                                                                                                          |
|                               |                                                                                                                                                                                                                                                                                                                                                                                                                                                                                                                                                                                                                                                                                                                                                                                                                                                                                                                                                                                                                                                                                                                                                                                                                                                                                                                                                   |

SCHOLARONE™  
Manuscripts

1  
2  
3 1 **TITLE**

4  
5  
6 2 **Study protocol for Controlled human infection for penicillin G against *Streptococcus pyogenes*: a double**  
7  
8 3 **blinded, placebo controlled, randomised trial to determine the minimum concentration required to**  
9  
10 4 **prevent experimental pharyngitis (The CHIPS trial)**

11  
12  
13 5 Thel K. Hla,<sup>1,2,3</sup> \* Joshua Osowicki,<sup>4,5,6</sup> Sam Salman,<sup>1,2,7</sup> Kevin T. Batty,<sup>8</sup> Julie Marsh,<sup>1</sup> Joseph Kado,<sup>1,2</sup> Renae  
14  
15 6 Barr,<sup>1</sup> Stephanie L. Enkel,<sup>1,2</sup> Thomas Snelling,<sup>9</sup> James McCarthy,<sup>10</sup> Andrew C. Steer,<sup>4,5,6</sup> Jonathan  
16  
17 7 Carapetis,<sup>1,2,11</sup> Laurens Manning<sup>1,2,3</sup>

18  
19  
20  
21  
22  
23  
24 9 <sup>1</sup>Wesfarmers Centre for Vaccines and Infectious Diseases, Telethon Kids Institute, Nedlands, WA, Australia

25  
26 10 <sup>2</sup>Medical School, University of Western Australia, Crawley, WA, Australia

27  
28 11 <sup>3</sup>Fiona Stanley Hospital, WA, Australia

29  
30 12 <sup>4</sup>Tropical Diseases Research Group, Murdoch Children's Research Institute, Melbourne, Victoria, Australia.

31  
32 13 <sup>5</sup>Department of Paediatrics, University of Melbourne, Victoria, Australia

33  
34 14 <sup>6</sup>Infectious Diseases Unit, Department of General Medicine, The Royal Children's Hospital Melbourne,  
35  
36 15 Victoria, Australia.

37  
38 16 <sup>7</sup>Clinical Pharmacology and Toxicology Unit PathWest, Perth, WA, Australia

39  
40 17 <sup>8</sup>Curtin Medical School, Curtin University, Bentley, WA, Australia

41  
42 18 <sup>9</sup>Sydney School of Public Health, University of Sydney, NSW, Australia

43  
44 19 <sup>10</sup>University of Melbourne, VIC, Australia

45  
46 20 <sup>11</sup>Perth Children's Hospital, WA, Australia

47  
48  
49  
50  
51 21

52  
53  
54 22

1  
2  
3 23 **\*Corresponding Author:** Dr Thel K. Hla, Telethon Kids Institute, Northern Entrance, Perth Children's  
4  
5 24 Hospital, Nedlands, Australia, WA 6009. Phone: (+618) 6319 1000; Email: [Thel.Hla@telethonkids.org.au](mailto:Thel.Hla@telethonkids.org.au)  
6  
7

8 25  
9

10  
11 26 **Keywords:** Group A Streptococcus, *Streptococcus pyogenes*, Human infection studies, Controlled human  
12  
13 27 infection, Human challenge, Prevention study, Acute Rheumatic Fever, Rheumatic Heart Disease,  
14  
15 28 Benzylpenicillin, Minimum Effective Dose  
16  
17

18 29  
19  
20  
21  
22  
23  
24  
25  
26  
27  
28  
29  
30  
31  
32  
33  
34  
35  
36  
37  
38  
39  
40  
41  
42  
43  
44  
45  
46  
47  
48  
49  
50  
51  
52  
53  
54  
55  
56  
57  
58  
59  
60

1  
2  
3 30 **ABSTRACT:**  
4  
5

6 31 **Introduction:**  
7  
8

9 32 Regular intramuscular benzathine penicillin G injections have been the cornerstone of rheumatic heart  
10  
11 33 disease (RHD) secondary prophylaxis since the 1950s. As the pharmacological correlate of protection  
12  
13 34 remains unknown, it is difficult to recommend changes to this established regimen. Determining the  
14  
15 35 minimum effective penicillin exposure required to prevent *Streptococcus pyogenes* infection will  
16  
17 36 accelerate development of new long-acting penicillins for RHD prevention as well as inform opportunities  
18  
19 37 to improve existing regimens. The CHIPS trial will address this knowledge gap by directly testing protection  
20  
21 38 afforded by different steady state plasma concentrations of penicillin in an established model of  
22  
23 39 experimental human *S. pyogenes* pharyngitis.  
24  
25  
26

27 40 **Methods and analysis:**  
28

29 41 This is a double-blinded, placebo-controlled, randomised experimental human infection study. Sixty  
30  
31 42 healthy adult volunteers aged 18 to 40 years will be recruited and randomised 1:1:1:1:1 to continuous  
32  
33 43 intravenous penicillin infusions targeting five different steady state plasma concentrations of 0 (placebo),  
34  
35 44 3, 6, 12 and 20 ng/mL via a midline catheter. Each participant's penicillin pharmacokinetic parameters will  
36  
37 45 be established prior to the challenge, to ensure accurate dosing for the continuous infusion. Following  
38  
39 46 challenge with a well-characterised strain of *S. pyogenes*, participants will be observed for up to 6 days  
40  
41 47 for development of pharyngitis and treated with antibiotics prior to discharge. The primary objective is to  
42  
43 48 determine the minimum effective steady-state plasma penicillin concentration required to prevent  
44  
45 49 experimental pharyngitis. Secondary objectives will explore systemic and mucosal immuno-inflammatory  
46  
47 50 responses during pharyngitis, bacterial colonisation dynamics, environmental contamination, and  
48  
49 51 qualitative evaluation of the participant experience.  
50  
51  
52  
53  
54  
55  
56  
57  
58  
59  
60

1  
2  
3 52 **Ethics and dissemination:** Ethical approval has been obtained. Findings will be reported in peer reviewed  
4  
5 53 publications and presented at national/international stakeholder forums.  
6  
7

8 54 **Trial Registration number:** ACTRN12621000751875  
9  
10

11 55  
12

13  
14 56  
15

16  
17 57  
18  
19  
20  
21  
22  
23  
24  
25  
26  
27  
28  
29  
30  
31  
32  
33  
34  
35  
36  
37  
38  
39  
40  
41  
42  
43  
44  
45  
46  
47  
48  
49  
50  
51  
52  
53  
54  
55  
56  
57  
58  
59  
60

For peer review only

1  
2  
3 58 **STRENGTHS AND LIMITATIONS OF THIS STUDY:**  
4  
5

- 6 59 1. The minimum effective dose of penicillin to prevent *S. pyogenes* infection is a vital piece of missing  
7  
8 60 information for secondary prevention ARF/ RHD (over 40 million people affected worldwide) and  
9  
10 61 will drive innovation of better penicillin formulations.  
11  
12  
13 62 2. This is the first human challenge infection study to evaluate the minimum concentration of an  
14  
15 63 antimicrobial required to prevent infection.  
16  
17 64 3. Bias will be reduced by randomising participants to placebo, or different target plasma  
18  
19 65 concentrations between 3 and 20 ng/mL using individualised data from a single dose  
20  
21 66 pharmacokinetic study conducted prior to the challenge.  
22  
23  
24 67 4. The challenge *S. pyogenes* strain has been selected after extensive characterisation which has a  
25  
26 68 limited virulence profile and a well-defined and repeatable minimum inhibitory concentration (12  
27  
28 69 ng/mL).  
29  
30

31 70  
32  
33

34 71  
35  
36  
37  
38  
39  
40  
41  
42  
43  
44  
45  
46  
47  
48  
49  
50  
51  
52  
53  
54  
55  
56  
57  
58  
59  
60

## 72 INTRODUCTION

73 Recurrent infections with *Streptococcus pyogenes* (Group A beta-haemolytic Streptococcus; *S. pyogenes*)  
74 are associated with development of acute rheumatic fever (ARF) and rheumatic heart disease (RHD).<sup>1</sup> RHD  
75 affects 40.5 million people globally and causes 306,000 deaths annually, mostly children and young adults  
76 living in low- and middle-income countries.<sup>2,3</sup> The efficacy of 3- to 4-weekly intramuscular (IM) injections  
77 of 1.2 million units (MU; 900 mg) benzathine benzylpenicillin G (BPG) for RHD secondary prophylaxis was  
78 first demonstrated in the 1950s and remains the only proven and cost-effective protection against  
79 recurrent infection and progressive RHD.<sup>4-6</sup> After deep IM injection, BPG is slowly hydrolysed to  
80 benzylpenicillin G (penicillin) and absorbed into the plasma.<sup>7</sup>

81 While secondary prophylaxis has been shown to be moderately effective in adherent individuals, poor  
82 adherence to painful monthly intramuscular injections (recommended for a minimum of 10 years) limits  
83 coverage of secondary prophylaxis and its overall effectiveness.<sup>6, 8, 9</sup> There is an urgent need to improve  
84 penicillin formulations for patients with ARF and RHD. Stakeholder consultations with consumers and RHD  
85 experts have consistently identified the ideal characteristics for secondary prophylaxis which include  
86 reducing dose frequency (ideally every 3-6 months), reducing pain of administration, alternative delivery  
87 strategies (including injectable implants or non-injection methods) and cold chain independence as key  
88 aspirations for an acceptable product.<sup>8, 10</sup> However, as the pharmacological correlate of protection  
89 remains unknown, it is difficult to recommend changes to the established regimen.

90 It has conventionally been assumed that critical pharmacological correlate for prevention of *S. pyogenes*  
91 infections is the time between IM injections that plasma penicillin concentrations remain above 0.02 mg/L  
92 (20 ng/mL), a typical minimum inhibitory concentration (MIC) for *S. pyogenes* isolates.<sup>11</sup> However,  
93 emerging evidence from a number of high risk settings demonstrates that even the most adherent  
94 patients do not maintain these target concentrations for the majority of the interval between BPG



1  
2  
3 95 injections.<sup>12,13</sup> Given the apparent efficacy in adherent patients, it is possible that current regimens of BPG  
4  
5 96 confer protection at lower, sustained inter-injection levels of plasma penicillin. Alternatively, transient  
6  
7 97 peaks in serum concentration may be sufficient as an intermittent presumptive treatment.  
8  
9

10 98 The opportunity to directly test the former hypothesis under the necessary controlled conditions has  
11  
12 99 arisen with the advent of a new experimental human infection model of *S. pyogenes* pharyngitis in healthy  
13  
14 100 adults.<sup>14</sup> The CHIPS trial will address a key knowledge gap by directly testing protection against  
15  
16 101 experimental human pharyngitis, in relation to different steady state plasma concentrations of penicillin,  
17  
18 102 to inform strategies for pharmacological secondary prophylaxis of RHD, including development of new  
19  
20 103 and more effective long-acting penicillin formulations or optimising dose and dosing intervals with  
21  
22 104 currently available formulations.  
23  
24  
25

## 26 27 105 **METHODS AND ANALYSIS:**

### 28 29 30 106 **Study Design**

31  
32 107 The CHIPS trial is a double-blinded, placebo-controlled, randomised human infection study to determine  
33  
34 108 the minimum effective steady-state plasma penicillin concentration required to prevent pharyngitis  
35  
36 109 following direct application of *S. pyogenes* to the oropharynx (Figure 1). Based on the successful human  
37  
38 110 challenge model developed in the CHIVAS-M75 study,<sup>14</sup> healthy adult volunteers will be recruited through  
39  
40 111 a private contract research organisation (CRO) and inoculated with the same *S. pyogenes emm75* strain.  
41  
42 112 A total of 60 participants will be recruited in 4 cohorts of 15 volunteers. Participants will be randomised  
43  
44 113 1:1:1:1 to receive continuous IV infusions of penicillin at 5 possible steady state plasma concentrations  
45  
46 114 of 0 (placebo), 3, 6, 12 and 20 ng/mL. The study will be conducted within the CRO facility in Perth, Western  
47  
48 115 Australia, with clinical support from a nearby tertiary hospital.  
49  
50  
51  
52

### 53 116 **Patient and public involvement**

54  
55  
56  
57  
58  
59  
60

1  
2  
3 117 The need to improve RHD secondary prophylaxis is underpinned by extensive consumer engagement  
4  
5 118 which has consistently identified pain and frequency associated with BPG injections as barriers to  
6  
7 119 adherence.<sup>8, 15, 16</sup> However, as this is a human infection study involving healthy volunteers, there is limited  
8  
9  
10 120 scope for health consumer input into the design and implementation of the study. While the methodology  
11  
12 121 of our study involves *S. pyogenes* pharyngitis and its prevention using continuous penicillin infusion, the  
13  
14 122 focus of our research and its intended beneficiaries are not sufferers of pharyngitis, but rather secondary  
15  
16 123 prophylaxis for those living with ARF/RHD. Due to this indirect connection, involvement of target patient  
17  
18 124 population would be premature. For the healthy volunteers who participate in the study, they will be  
19  
20  
21 125 made aware of results of this trial and informed of how to access the published findings.  
22  
23

#### 24 126 **Study objectives and outcomes**

25  
26  
27 127 The primary objective is to determine the minimum plasma penicillin concentration associated with  
28  
29 128 protection against experimental *S. pyogenes* pharyngitis following the challenge, assessed by the  
30  
31 129 development of acute symptomatic pharyngitis (primary outcome) during the confinement period. This is  
32  
33 130 assessed using the pharyngitis case definition from CHIVAS-M75 study, incorporating elements of clinical  
34  
35 131 prediction rules based on Centor and McIsaac scores, change in tonsil size and real time molecular point-  
36  
37 132 of-care test for *S. pyogenes* (ID NOW Strep A2, Abbott).<sup>14</sup> Secondary objectives include identification of  
38  
39 133 plasma penicillin concentration required to prevent pharyngeal colonisation of *S. pyogenes*, and  
40  
41 134 characterisation of immune responses and inflammatory profiles comparing participants across penicillin  
42  
43 135 dose bands and pharyngitis outcome. Exploratory objectives are to examine *S. pyogenes* potential for  
44  
45 136 environmental contamination (with relevance to disease transmission) and explore motivations and the  
46  
47 137 lived experiences of the volunteers who take part in human infection studies (listed in Table 1 along with  
48  
49 138 outcome/endpoint assessments).  
50  
51  
52  
53

54 139  
55  
56  
57  
58  
59  
60

140 Table 1: Study objectives and outcomes

|                  | Objective(s)                                                                                                                                                                                                                                                                                                                                                                                                                                                                                                                                                                                                                                                                                                                                                                                                                                                                                                                                                                                                                             | Outcome(s)/ Endpoint(s)                                                                                                                                                                                                                                                                                                                                                                                                                                                                                                                                                                                                                                                                |
|------------------|------------------------------------------------------------------------------------------------------------------------------------------------------------------------------------------------------------------------------------------------------------------------------------------------------------------------------------------------------------------------------------------------------------------------------------------------------------------------------------------------------------------------------------------------------------------------------------------------------------------------------------------------------------------------------------------------------------------------------------------------------------------------------------------------------------------------------------------------------------------------------------------------------------------------------------------------------------------------------------------------------------------------------------------|----------------------------------------------------------------------------------------------------------------------------------------------------------------------------------------------------------------------------------------------------------------------------------------------------------------------------------------------------------------------------------------------------------------------------------------------------------------------------------------------------------------------------------------------------------------------------------------------------------------------------------------------------------------------------------------|
| <b>Primary</b>   | To determine the minimum plasma penicillin concentration required to prevent acute symptomatic <i>S. pyogenes</i> pharyngitis following a direct oropharyngeal challenge with <i>S. pyogenes</i> M75                                                                                                                                                                                                                                                                                                                                                                                                                                                                                                                                                                                                                                                                                                                                                                                                                                     | Development of <i>S. pyogenes</i> pharyngitis during confinement period, according to a pre-defined clinical and laboratory criteria                                                                                                                                                                                                                                                                                                                                                                                                                                                                                                                                                   |
| <b>Secondary</b> | <ol style="list-style-type: none"> <li>To identify the target plasma penicillin concentration required to prevent <i>S. pyogenes</i> colonisation of the pharynx</li> <li>To identify the target salivary penicillin concentration required to prevent <i>S. pyogenes</i> pharyngitis or colonisation</li> <li>To characterise plasma humoral and cellular immunological profiles of immune response to experimental challenge with <i>S. pyogenes</i> in healthy participants</li> <li>To characterise plasma inflammatory (CRP and procalcitonin) and metabolomic profiles of <i>S. pyogenes</i> pharyngitis</li> <li>To identify whether Cystatin C- based markers of renal function improve estimates of penicillin G renal clearance compared with creatinine-based measures</li> <li>To explore microbiological and local factors associated with <i>S. pyogenes</i> adhesion to tonsillar mucosa</li> <li>To explore microbiological and local factors associated with <i>S. pyogenes</i> adhesion to tonsillar mucosa</li> </ol> | <p>Development of <i>S. pyogenes</i> colonisation following challenge, defined as <i>S. pyogenes</i> M75 isolation from throat swab in absence of signs and symptoms of clinical pharyngitis after completing antibiotic treatment at conclusion of confinement period.</p> <p>Assays to detect penicillin concentration in saliva from all participants</p> <p>Laboratory assays to measure immunological and inflammatory responses to the challenge</p> <p>Measurement of inflammatory markers from blood samples</p> <p>Measurement of Cystatin-C from blood samples</p> <p>Laboratory assays to measure mucosal response</p> <p>Laboratory assays to measure mucosal response</p> |

- |     |                                                                                                                                                                     |                                                                                         |
|-----|---------------------------------------------------------------------------------------------------------------------------------------------------------------------|-----------------------------------------------------------------------------------------|
| 8.  | To explore <i>S. pyogenes</i> transcriptomic changes in response to penicillin exposure in <i>S. pyogenes</i> pharyngitis                                           | Laboratory assays to measure mucosal response                                           |
| 9.  | To investigate potential environmental contamination of <i>S. pyogenes</i> via large respiratory droplets, airborne small respiratory droplets, and surface contact | Microbiological and culture analysis of participants' contact surfaces and surroundings |
| 10. | To explore motivations, attitudes, and experiences of participating in clinical trials and human challenge studies                                                  | Responses to questionnaires administered during study period by participants            |

141

## 142 **Recruitment and eligibility**

143 A database of healthy volunteers maintained by the CRO will be used for recruitment of study participants,  
 144 along with multi-media advertisements (e.g., social media platforms of CRO and affiliated institutions)  
 145 using materials approved by the ethics committee. Participants will be financially reimbursed of a value  
 146 determined to be satisfactory by the ethics committee. Healthy adult males and non-pregnant, non-  
 147 lactating females aged 18 – 40 years without pre-existing risk factors for severe *S. pyogenes* disease will  
 148 be recruited. Strict eligibility criteria are in place to mitigate risks to potential participants (detailed in  
 149 Supplementary Materials 1). In addition to usual 'healthy adult' inclusion and exclusion criteria, medical  
 150 history and physical examination, prospective participants will undertake electrocardiography and  
 151 transthoracic echocardiography to rule out undiagnosed sub-clinical cardiac pathology. They will also  
 152 undergo screening throat swabs and a serum *emm75* type-specific serology to exclude carriage and prior  
 153 immunity to *S. pyogenes emm75* strains, respectively.

## 154 **Study Interventions**

155 *Dose-finding pharmacokinetic study*

1  
2  
3 156 The overall journey of a participant from screening to completion of follow up is illustrated in Figure 2. At  
4  
5 157 least several days prior to the inpatient challenge admission, each participant will have an individual  
6  
7 158 pharmacokinetic dose-finding assessment. A 600 mg bolus dose of intravenous penicillin will be  
8  
9  
10 159 administered and serial venous blood samples will be collected for plasma penicillin concentration  
11  
12 160 measurements at baseline, then 15, 30, 60, 120, 180, 240, and 360 minutes afterwards. Clearance and  
13  
14 161 volume of distribution will be derived to enable calculation of individualised IV penicillin continuous  
15  
16 162 infusion doses to attain the randomised target concentration for the *S. pyogenes* challenge admission.

### 19 163 *Randomisation procedure*

21  
22 164 First 45 participants will be randomised 1:1:1:1:1 to one of 5 different target steady state concentrations  
23  
24 165 (0 [placebo], 3, 6, 12 and 20 ng/mL). To ensure there is at least one participant in each concentration for  
25  
26 166 each group of 5 and 3-per-concentration in each cohort of 15 participants, the volunteers will be block  
27  
28 167 randomised in groups of 5 following an allocation sequence generated by the study statistician and stored  
29  
30 168 on a secure server, accessible only to the unblinded pharmacy and analytical team members. All clinical  
31  
32 169 staff and participants will remain blinded to the treatment allocation (concentration level) for the duration  
33  
34 170 of the study.

### 38 171 *Challenge procedures*

40  
41 172 Participants are considered enrolled from the time of commencing the penicillin infusion via a midline  
42  
43 173 intravenous catheter on the day of admission (Day -1). On the day of challenge (Day +1), a sterile Dacron  
44  
45 174 swab is dipped in a 1mL single-dose vial containing  $1-3 \times 10^5$  colony-forming units (CFU) of *emm75 S.*  
46  
47 175 *pyogenes* and applied directly to the participant's oropharynx. The single-dose vials will be produced  
48  
49 176 according to the principles of Good Manufacturing Practice.<sup>17, 18</sup> Each participant will be challenged once  
50  
51 177 only, using a standardised procedure analogous to a diagnostic throat swab done 'in reverse', as  
52  
53 178 previously described.<sup>17</sup> Participants will be fasted for 90 minutes before and after challenge.

1  
2  
3 179 *Confinement and discharge*  
4  
5

6 180 Following challenge, participants will remain inpatients at the CRO facility until reaching the primary  
7  
8 181 pharyngitis outcome or until 5 days after challenge if they remain asymptomatic, whichever occurs first.  
9  
10 182 The penicillin infusion will stop at that time and a separate oral antibiotic course will be initiated  
11  
12 183 (azithromycin 500 mg once daily for 5 days<sup>19</sup>). All participants will be monitored as inpatients for at least  
13  
14  
15 184 24 hours after their first dose of oral antibiotic prior to discharge. Subsequent safety follow-up visits will  
16  
17 185 occur 7 and 28 days after the first dose of oral antibiotic. Participants will return unused antibiotic tablets  
18  
19 186 which will allow monitoring of adherence to the remainder of oral treatment.  
20  
21

22 187 *Adding/removing treatment arms*  
23  
24

25 188 After 45 participants (3 cohorts), an interim analysis will be performed. Provided that the pre-specified  
26  
27 189 statistical thresholds are met, the investigators may adjust the target concentration arms (while retaining  
28  
29 190 the placebo arm) for the last cohort of 15 participants (to concentrations up to 100 ng/mL) to increase  
30  
31 191 the precision of the minimum effective concentration estimate.  
32  
33

34  
35 192 *Pharmaceutical handling of penicillin*  
36  
37

38 193 For each participant, individual pharmacokinetic parameters will inform the penicillin dose required to  
39  
40 194 prepare the intravenous infusion bags for all possible dose allocations. After randomisation, infusion bags  
41  
42 195 will be prepared at an aseptic compounding facility according to the individualised calculated dose to  
43  
44 196 attain the allocated steady state plasma penicillin concentration. The stability of benzylpenicillin in 0.9%  
45  
46 197 w/v sodium chloride IV infusion bags and the optimum sodium citrate concentration has been formally  
47  
48 198 evaluated for the CHIPS trial (manuscript accepted<sup>20</sup>). These stability studies demonstrated excellent  
49  
50 199 chemical preservation of buffered benzylpenicillin at room temperature, with <1% degradation after 24  
51  
52 200 hours for benzylpenicillin 25 µg/mL in sodium citrate 100 µg/mL in 0.9% w/v sodium chloride solution,  
53  
54  
55 201 whether exposed to or protected from artificial light. Continuous infusion bags will be routinely changed  
56  
57

202 every 24 hours. A sample of remnant fluid from each bag will be collected, stored at -80 °C, and assayed  
203 to confirm the expected stability of penicillin over the 24-hour period.

204 *Measurement of possible environmental contamination and transmission potential*

205 At 3 post-challenge timepoints (+24, +36 and +48 hours), Colistin Nalidixic Acid (CNA) agar plates will be  
206 placed in the participant's room for 4 hours to capture potential droplet or airborne transmission of *S.*  
207 *pyogenes*. Swabs will also be taken of the participant's surroundings and personal devices (approximately  
208 25cm<sup>2</sup>). To detect droplet transmission potential, participants will read a short text at each timepoint with  
209 CNA plates placed at varying lengths (30cm, 90cm and 180cm). All swabs and CNA plates collected will  
210 undergo transfer and processing for microbial culture for beta-haemolytic Streptococci (BHS) as per  
211 Clinical and Laboratory Standards Institute (CLSI) standards, including use of positive and negative  
212 controls. If no growth is detected after 24 hours, incubation will be extended for another 24 hours.  
213 Presence of *S. pyogenes* from beta-haemolytic colonies will be confirmed with agglutination kits using  
214 group specific antigens (Streptex™, Thermo Scientific).

215 *Study participants' experience*

216 Participants will complete surveys at 3 timepoints: admission, at diagnosis of pharyngitis or Day +3 (if  
217 asymptomatic), and immediately prior to discharge. These surveys will collect qualitative data using  
218 standardised questionnaires evaluating participant's motivation for involvement in the study and how  
219 expectations or concerns held prior to admission compared to the experience. In addition, participants  
220 will also be asked to keep a diary and record elements of their challenge admission specific to their  
221 experience of participating in a human challenge study in a non-structured form. This qualitative data will  
222 be collected and collated into themes for analysis and reporting.

223

## 224 **Governance**

225 A unique governance structure, incorporating a Safety Data Review Team (SDRT), has been set up to meet  
226 the needs of this study as illustrated in Figure 3. Day-to-day conduct of the study and reporting of its  
227 progress to the SDRT is done by the trial management group whose members will remain blinded to the  
228 randomised allocation until after completion of study. SDRT has voting members (chaired by an  
229 independent expert) who make decisions regarding continuation of trial after each cohort of 15 is  
230 completed, with non-voting members from the analytical team and trial steering committee providing an  
231 advisory role. An independent study monitor will be engaged who will ensure that the investigation is  
232 conducted according to the protocol and regulatory requirements. Strict data management plan will be  
233 adhered to protect participant confidentiality in compliance with Good Clinical Practice guidelines.

## 234 **Safety**

235 As in the CHIVAS-M75<sup>14</sup> study, the following will be considered medically significant events in addition to  
236 the standard definitions – local and systemic complications of *S. pyogenes* infection, autoimmune  
237 sequelae of *S. pyogenes* infection (such as ARF, RHD, and glomerulonephritis), recurrent pharyngitis in  
238 participants caused by the challenge strain, and secondary cases of *S. pyogenes* infection with the  
239 challenge strain in non-participants.

240 *Participant safety during confinement:* Participants will be monitored closely during the confinement  
241 period in a purpose-built clinical trials facility with 24-hours clinical staffing and twice daily reviews. All  
242 adverse events will be recorded in real time and any serious adverse event (SAE) will be reported to the  
243 SDRT within 24 hours of their occurrence. Starting a new cohort of participants will require approval by  
244 the SDRT following an interim review after each cohort's confinement period is completed.

245 *Long term safety:* The risk of long-term carriage of *S. pyogenes* is minimised with treatment using a non-  
246 beta-lactam antibiotic (azithromycin) prior to discharge. Additional reassurance comes from the CHIVAS-



1  
2  
3 247 M75 study in which none of 25 participants challenged with the *emm75* strain had developed persistent  
4  
5 248 carriage, systemic or autoimmune complications of *S. pyogenes* at completion of 6 months follow up.<sup>14</sup>  
6  
7 249 The risk of secondary spread of infection from participants will be negligible as they will be confined in a  
8  
9  
10 250 clinical trial facility with stringent infection control measures and will have had 24 hours of oral antibiotic  
11  
12 251 treatment by the time of discharge back to community (in keeping with public health recommendations  
13  
14 252 for school exclusion).

### 253 **Challenge strain**

254 The *S. pyogenes* challenge strain (*emm75*, M75) was isolated from a patient with pharyngitis in 2011. It  
255 has been extensively characterised and selected for its suitability for human challenge. It is an infrequent  
256 *emm*-type in most published series but reliably causes pharyngitis. The particular challenge strain has  
257 favourable antibiotic susceptibility, and does not have a virulence profile typical of hypervirulent strains.<sup>18</sup>  
258 The characterisation, selection, manufacture, storage, and quality assurance approach for the *emm75*  
259 challenge strain *S. pyogenes* has previously been described.<sup>14,17</sup> In the CHIVAS-M75 study, at the starting  
260 dose level of  $1-3 \times 10^5$  CFU in each single-dose vial, the pharyngitis attack rate was 85%.<sup>14</sup>

### 261 **Sample size calculation**

262 Based on simulations, a maximum of 60 participants are required (recruited in 4 cohorts of equal size;  
263 starting with 5 treatment arms) to detect a minimum effective dose (MED) between 0-20 ng/mL, with  
264 >80% power and Type 1 error <5%. Trial simulations were based on: (i) an anticipated 25% of placebo  
265 participants symptom-free at the end of study Day +5; (ii) a monotonic normal dynamic linear model with  
266 weakly informative prior distributions; (iii) equal allocation to all treatment arms; (iv) interim analyses  
267 after each cohort has completed (i.e. every 15 participants); (v) a high target of 90% symptom-free and a  
268 low target of 80% symptom-free in determining the MED; and (vi) stopping rules for success if the  
269 posterior probability that the MED is greater than the low target is greater than 80% (i.e.  $\text{pr}(\text{MED} > \text{low})$

1  
2  
3 270 target)>80%) and for futility if the posterior probability that the MED is greater than the upper target is  
4  
5 271 less than 10% (i.e.  $\text{pr}(\text{MED} > \text{upper target}) < 10\%$ ). Trial operating characteristics were calculated for 8  
6  
7 272 scenarios ranging from null efficacy to MED detected at the highest dose level.  
8  
9

### 10 273 **Data analysis plan**

11  
12  
13 274 Study data will be collected using paper and electronic source documents and managed using a secure  
14  
15 275 institution hosted electronic database (Research Electronic Data Capture, USA). For the primary endpoint,  
16  
17 276 Bayesian analyses will be performed on the accumulating data after each cohort completes study Day +5  
18  
19 277 and the primary pharyngitis endpoint is determined for each participant. It is anticipated that up to 25%  
20  
21 278 of participants in the placebo arm may remain free from pharyngitis. A monotonic normal dynamic linear  
22  
23 279 model will be used to assess the dose response and estimate the MED. After the completion of the second  
24  
25 280 (n=30) and third (n=45) cohorts, we will evaluate stopping rules for success ( $\text{pr}(\text{MED} > \text{low target}) > 80\%$ )  
26  
27 281 and for futility ( $\text{pr}(\text{MED} > \text{upper target}) < 10\%$ ). All secondary outcomes will be summarised by treatment  
28  
29 282 arm using appropriate statistics, including mean and standard deviation for continuous variables with  
30  
31 283 symmetrical distributions or median and interquartile range for asymmetric distributions. Categorical  
32  
33 284 variables will be summarised using frequencies and percentages.  
34  
35  
36  
37  
38

### 39 285 **ETHICS AND DISSEMINATION**

40  
41 286 This protocol (Universal Trial Number U1111-1264-9535) has been reviewed and approved by the  
42  
43 287 Bellberry Human Research Ethics Committee (Ref: 2021-03-295) and is registered on the Australian New  
44  
45 288 Zealand Clinical Trials Registry ([www.anzctr.org.au](http://www.anzctr.org.au), ACTRN12621000751875). The sponsor is the Telethon  
46  
47 289 Kids Institute and the study is indemnified under the existing institutional insurance policy. The results of  
48  
49 290 the study will be of national and international significance. Our team has strong links to stakeholder  
50  
51 291 groups and national and international profiles that will ensure dissemination of the results in peer-  
52  
53 292 reviewed journals and presentation at relevant congresses.  
54  
55  
56  
57  
58  
59  
60

1  
2  
3 **293 DISCUSSION**  
4  
5

6 294 The Global Resolution on Rheumatic Fever and Rheumatic Heart Disease calls for new technological  
7  
8 295 approaches to improving global RHD control, including the “development of a long-acting formulation of  
9  
10 296 penicillin that might improve secondary prophylactic regimens”.<sup>21</sup> The CHIPS trial aims to address a key  
11  
12 297 knowledge gap toward achieving this goal, by challenging the dogma regarding what is the MED of  
13  
14 298 penicillin for successful prevention of *S. pyogenes* infection and secondary RHD prophylaxis.

15  
16  
17  
18 299 Experimental human infection, or challenge studies, have been core platforms for infectious diseases  
19  
20 300 research since at least Edward Jenner’s 18<sup>th</sup> century smallpox vaccine studies.<sup>22</sup> In recent decades,  
21  
22 301 reinforced by rigorous ethical frameworks and independent safety reviews, modern human challenge  
23  
24 302 trials have contributed to accelerating development of new drugs, vaccines, and diagnostics.<sup>22, 23</sup> The  
25  
26 303 CHIPS trial is the first to take advantage of the successful establishment of a human pharyngitis model in  
27  
28 304 the CHIVAS-M75 study.<sup>14</sup> Although human challenge trials have previously tested the efficacy of drugs,  
29  
30 305 the use of randomised steady-state plasma concentration levels of penicillin aiming to demonstrate a  
31  
32 306 prophylactic threshold is an innovative approach among modern human challenge trials.<sup>22-24</sup> Even with a  
33  
34 307 sample size of 60 participants, our study is adequately powered to detect the anticipated effect size.<sup>25-28</sup>  
35  
36 308 The minimum effective dose of penicillin established in the present study is expected to provide evidence  
37  
38 309 that sustained low plasma penicillin concentrations (<20 ng/mL) do prevent *S. pyogenes* infection while  
39  
40 310 shedding further light on the relationship between serum and tissue penicillin concentrations and the role  
41  
42 311 they might play in host-pathogen interaction leading to pharyngitis. Pharmacokinetic correlates of  
43  
44 312 protection identified will inform the target product profile for long-acting penicillin formulations and the  
45  
46 313 development of implants or depot injections that provide a ‘smoother’ exposure profile to overcome the  
47  
48 314 need for frequent painful injections associated with low adherence rates.<sup>6, 8, 29</sup>  
49  
50  
51  
52  
53  
54  
55  
56  
57  
58  
59  
60

1  
2  
3 315 Findings from the CHIPS trial may have wider applications beyond RHD secondary prophylaxis, for other  
4  
5 316 indications for penicillin prophylaxis, such as recurrent lower extremity cellulitis. *S. pyogenes* is a leading  
6  
7 317 cause of erysipelas and cellulitis, the latter commonly affecting older adults living in developed  
8  
9 318 economies.<sup>30-33</sup> In the United States alone, it is estimated to cost \$3.7 billion in healthcare expenditure  
10  
11 319 from 14.5 million cases annually.<sup>34</sup> In addition, improved long-acting formulations of penicillin could have  
12  
13 320 advantages for treatment of certain conditions including syphilis and other treponemal syndromes.  
14  
15  
16  
17 321 Potential limitations of our approach include the uncertain generalisability of a MED related to a single  
18  
19 322 strain. Nonetheless, notwithstanding recent concerns stemming from rare penicillin binding protein  
20  
21 323 mutations, *S. pyogenes* remains universally susceptible to penicillin.<sup>35-37</sup> The relationship between *in vitro*  
22  
23 324 MIC of the *emm75* challenge strain and the MED determined in the CHIPS trial will still be relevant to  
24  
25 325 considering other strains with different MICs. Likewise, it is uncertain whether findings in healthy  
26  
27 326 volunteers are generalisable to the relevant patient groups for RHD secondary prophylaxis. Certainly,  
28  
29 327 future research will be needed to validate novel regimens of existing preparations or novel formulations  
30  
31 328 which are underpinned by new knowledge obtained from this trial across a broad range of target patient  
32  
33 329 populations. The CHIPS trial will also be a platform to build on insights into host-pathogen interactions  
34  
35 330 already emerging from the CHIVAS-M75 trial, to exploring environmental determinants of transmission,  
36  
37 331 and adding to the literature exploring the experience of participants in human challenge trials.<sup>38, 39</sup>  
38  
39  
40  
41

#### 42 332 **AUTHORS' CONTRIBUTIONS**

43  
44  
45 333 TKH, JO and LM prepared the first draft of the manuscript. JO, LM and JC conceived the study design. All  
46  
47 334 authors contributed to the development of the study protocol and revision of the manuscript and have  
48  
49 335 approved the final manuscript.  
50  
51

#### 52 336 **COMPETING INTERESTS STATEMENT**

53  
54  
55 337 Investigators for this study have no financial or other competing interests.  
56  
57

1  
2  
3 338 **FUNDING STATEMENT**  
4  
5

6 339 This study is funded by the National Health and Medical Research Council of Australia (NHMRC) Clinical  
7  
8 340 Trials & Cohort Studies - grant number APP1187743.  
9

10  
11 341 **REFERENCES**  
12  
13

- 14 342 1. Carapetis JR, Beaton A, Cunningham MW, Guilherme L, Karthikeyan G, Mayosi BM, et al. Acute  
15 343 rheumatic fever and rheumatic heart disease. *Nat Rev Dis Primers*. 2016;2:15084.  
16 344 2. Carapetis JR. Rheumatic heart disease in developing countries. *N Engl J Med*. 2007;357(5):439-41.  
17 345 3. Roth GA, Mensah GA, Johnson CO, Addolorato G, Ammirati E, Baddour LM, et al. Global Burden  
18 346 of Cardiovascular Diseases and Risk Factors, 1990-2019: Update From the GBD 2019 Study. *J Am Coll*  
19 347 *Cardiol*. 2020;76(25):2982-3021.  
20 348 4. Denny FW, Wannamaker LW, Hahn EO. Comparative effects of penicillin, aureomycin and  
21 349 terramycin on streptococcal tonsillitis and pharyngitis. *Pediatrics*. 1953;11:7-13.  
22 350 5. Stollerman GH, Rusoff JH, Hirschfeld I. Prophylaxis against Group A Streptococci in Rheumatic  
23 351 fever: the use of single monthly injections of Benzathine Penicillin G. *N Engl J Med*. 1955;252(19):787-92.  
24 352 6. Wyber R, Carapetis J. Evolution, evidence and effect of secondary prophylaxis against rheumatic  
25 353 fever. *Journal of the Practice of Cardiovascular Sciences*. 2015;1(1):9-14.  
26 354 7. Ginsburg CM, McCracken GH, Jr., Zweighaft TC. Serum penicillin concentrations after  
27 355 intramuscular administration of benzathine penicillin G in children. *Pediatrics*. 1982;69(4):452-4.  
28 356 8. Wyber R, Boyd BJ, Colquhoun S, Currie BJ, Engel M, Kado J, et al. Preliminary consultation on  
29 357 preferred product characteristics of benzathine penicillin G for secondary prophylaxis of rheumatic fever.  
30 358 Drug delivery and translational research. 2016;6(5):572-8.  
31 359 9. Wood H, Feinstein A, Taranta A, Epstein J, Simpson R. Rheumatic fever in children and  
32 360 adolescents: a long term epidemiologic study of subsequent prophylaxis, streptococcal infections, and  
33 361 clinical sequelae: III. Comparative effectiveness of three prophylaxis regimes in preventing streptococcal  
34 362 infections and rheumatic recurrences. *Annals of Internal Medicine*. 1964;20(2):31-46.  
35 363 10. Sika-Paotonu D, Laing B, Cockburn A, Gu V, Tiatia R, Sung YK, et al. The BPG reformulation  
36 364 preferences of children and young people – an interim analysis. Xavier Louisiana School of Pharmacy  
37 365 Health Disparities Conference; 8-10 April; New Orleans 2019.  
38 366 11. Craig W. Re-evaluating current antibiotic therapy. *Respir Med*. 2001;95:S12-S9.  
39 367 12. Hand RM, Salman S, Newall N, Vine J, Page-Sharp M, Bowen AC, et al. A population  
40 368 pharmacokinetic study of benzathine benzylpenicillin G administration in children and adolescents with  
41 369 rheumatic heart disease: new insights for improved secondary prophylaxis strategies. *J Antimicrob*  
42 370 *Chemother*. 2019;74(7):1984-91.  
43 371 13. Ketema EB, Gishen NZ, Hailu A, Leul A, Hadgu A, Hagos K, et al. High risk of early sub-therapeutic  
44 372 penicillin concentrations after intramuscular benzathine penicillin G injections in Ethiopian children and  
45 373 adults with rheumatic heart disease. *PLoS Negl Trop Dis*. 2021;15(6):e0009399.  
46 374 14. Osowicki J, Azzopardi KI, Fabri L, Frost HR, Rivera-Hernandez T, Neeland MR, et al. A controlled  
47 375 human infection model of *Streptococcus pyogenes* pharyngitis (CHIVAS-M75): an  
48 376 observational, dose-finding study. *The Lancet Microbe*. 2021.  
49 377 15. Chamberlain-Salaun J, Mills J, Kevat PM, Rémond MG, Maguire GP. Sharing success -  
50 378 understanding barriers and enablers to secondary prophylaxis delivery for rheumatic fever and rheumatic  
51 379 heart disease. *BMC Cardiovasc Disord*. 2016;16(1):166.

- 1  
2  
3 380 16. Huck DM, Nalubwama H, Longenecker CT, Frank SH, Okello E, Webel AR. A qualitative examination  
4 381 of secondary prophylaxis in rheumatic heart disease: factors influencing adherence to secondary  
5 382 prophylaxis in Uganda. *Glob Heart*. 2015;10(1):63-9.e1.
- 6 383 17. Osowicki J, Azzopardi K, Baker C, Waddington C, Pandey M, Schuster T, et al. Controlled human  
7 384 infection for vaccination against *Streptococcus pyogenes* (CHIVAS): Establishing a group A *Streptococcus*  
8 385 pharyngitis human infection study. *Vaccine*. 2019;37(26):3485-94.
- 9 386 18. Osowicki J, Azzopardi KI, McIntyre L, Rivera-Hernandez T, Ong CY, Baker C, et al. A Controlled  
10 387 Human Infection Model of Group A *Streptococcus* Pharyngitis: Which Strain and Why? *mSphere*.  
11 388 2019;4(1).
- 12 389 19. Therapeutic Guidelines Ltd. Therapeutic Guidelines - Antibiotic (eTG December 2020) 2021.
- 13 390 20. Batty KT, Page-Sharp M, Salman S, Hla TK, Manning L. Stability of benzylpenicillin for continuous  
14 391 intravenous infusions: an isotonic formulation for therapeutic use and a low-dose formulation for clinical  
15 392 trial (accepted). *J Infect Chemother*.
- 16 393 21. Vekemans J, Gouvea-Reis F, Kim JH, Excler JL, Smeesters PR, O'Brien KL, et al. The path to group A  
17 394 *Streptococcus* vaccines: WHO research and development technology roadmap and preferred product  
18 395 characteristics. *Clin Infect Dis*. 2019;69(5):877-83.
- 19 396 22. Roostenberg M, Hoogerwerf MA, Ferreira DM, Mordmuller B, Yazdanbakhsh M. Experimental  
20 397 infection of human volunteers. *Lancet Infect Dis*. 2018;18(10):e312-e22.
- 21 398 23. Sekhar A, Kang G. Human challenge trials in vaccine development. *Semin Immunol*.  
22 399 2020;50:101429.
- 23 400 24. Kalil JA, Halperin SA, Langley JM. Human challenge studies: a review of adequacy of reporting  
24 401 methods and results. *Future Microbiol*. 2012;7(4):481-95.
- 25 402 25. D'Alessandri R, Plotkin G, Kluge RM, Wittner MK, Fox EN, Dorfman A, et al. Protective studies with  
26 403 group A streptococcal M protein vaccine. III. Challenge of volunteers after systemic or intranasal  
27 404 immunization with Type 3 or Type 12 group A *Streptococcus*. *J Infect Dis*. 1978;138(6):712-8.
- 28 405 26. Fox EN, Waldman RH, Wittner MK, Mauzeri AA, Dorfman A. Protective study with a group A  
29 406 streptococcal M protein vaccine. Infectivity challenge of human volunteers. *J Clin Invest*. 1973;52(8):1885-  
30 407 92.
- 31 408 27. Polly SM, Waldman RH, High P, Wittner MK, Dorfman A. Protective studies with a group A  
32 409 streptococcal M protein vaccine. II. Challenge of volunteers after local immunization in the upper  
33 410 respiratory tract. *J Infect Dis*. 1975;131(3):217-24.
- 34 411 28. Waldman RH, Lee JD, Polly SM, Dorfman A, Fox EN. Group A streptococcal M protein vaccine:  
35 412 protection following immunization via the respiratory tract. *Dev Biol Stand*. 1975;28:429-34.
- 36 413 29. Montagnat OD, Webster GR, Bullita J, Landersdorfer C, Wyber R, Sheel M, et al. Lessons learned  
37 414 in the development of sustained release penicillin drug delivery systems for the prophylactic treatment of  
38 415 rheumatic heart disease (RHD). *Drug delivery and translational research*. 2018;8(3):729-39.
- 39 416 30. Bernard P, Bedane C, Mounier M, Denis F, Catanzano G, Bonnetblanc JM. Streptococcal cause of  
40 417 erysipelas and cellulitis in adults. A microbiologic study using a direct immunofluorescence technique.  
41 418 *Arch Dermatol*. 1989;125(6):779-82.
- 42 419 31. Leppard BJ, Seal DV, Colman G, Hallas G. The value of bacteriology and serology in the diagnosis  
43 420 of cellulitis and erysipelas. *Br J Dermatol*. 1985;112(5):559-67.
- 44 421 32. Cannon J, Dyer J, Carapetis J, Manning L. Epidemiology and risk factors for recurrent severe lower  
45 422 limb cellulitis: a longitudinal cohort study. *Clin Microbiol Infect*. 2018;24(10):1084-8.
- 46 423 33. Cannon J, Rajakaruna G, Dyer J, Carapetis J, Manning L. Severe lower limb cellulitis: defining the  
47 424 epidemiology and risk factors for primary episodes in a population-based case-control study. *Clin*  
48 425 *Microbiol Infect*. 2018;24(10):1089-94.
- 49 426 34. Raff AB, Kroshinsky D. Cellulitis: A Review. *JAMA*. 2016;316(3):325-37.

- 1  
2  
3 427 35. Horn DL, Zabriskie JB, Austrian R, Cleary PP, Ferretti JJ, Fischetti VA, et al. Why have group A  
4 428 streptococci remained susceptible to penicillin? Report on a symposium. Clin Infect Dis. 1998;26(6):1341-  
5 429 5.  
6 430 36. Macris MH, Hartman N, Murray B, Klein RF, Roberts RB, Kaplan EL, et al. Studies of the continuing  
7 431 susceptibility of group A streptococcal strains to penicillin during eight decades. Pediatric Infectious  
8 432 Disease Journal. 1998;17(5):377-81.  
9 433 37. Vannice KS, Ricaldi J, Nanduri S, Fang FC, Lynch JB, Bryson-Cahn C, et al. Streptococcus pyogenes  
10 434 pbp2x Mutation Confers Reduced Susceptibility to beta-Lactam Antibiotics. Clinical Infectious Diseases.  
11 435 2020;71(1):201-4.  
12 436 38. Anderson J, Imran S, Frost HR, Azzopardi KI, Jalali S, Novakovic B, et al. Immune signature of acute  
13 437 pharyngitis in a Streptococcus pyogenes human challenge trial. Nat Commun. 2022;13(1):769.  
14 438 39. Curry LA, Nembhard IM, Bradley EH. Qualitative and mixed methods provide unique contributions  
15 439 to outcomes research. Circulation. 2009;119(10):1442-52.  
16  
17  
18  
19  
20

21 441 **FIGURES**

22  
23  
24 442 **Figure 1:** Pictorial synopsis of the CHIPS study. (Pen C<sub>ss</sub>, penicillin steady state concentration; PK,  
25 443 pharmacokinetic)

26  
27 444 **Figure 2:** Participants' journey through the CHIPS study.

28  
29  
30 445 **Figure 3:** Schematic illustration of governance structure and information flow. (AE – adverse event; CRO  
31 446 – contract research organisation; LCMS – liquid crystallography mass spectrometry; PI – principal  
32 447 investigator; PICC – peripherally inserted central catheter; SAE – serious adverse event)  
33  
34  
35  
36

37 449 **WORD COUNT - 3406**  
38  
39  
40  
41  
42  
43  
44  
45  
46  
47  
48  
49  
50  
51  
52  
53  
54  
55  
56  
57  
58  
59  
60



# CHIP

CONTROLLED HUMAN INFECTION  
FOR PENICILLIN AGAINST  
*STREPTOCOCCUS PYOGENES*

PK ANALYSIS &  
INDIVIDUALISED  
INFUSION DOSE  
ALLOCATION

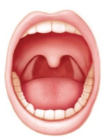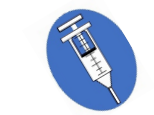

PENICILLIN  
BOLUS

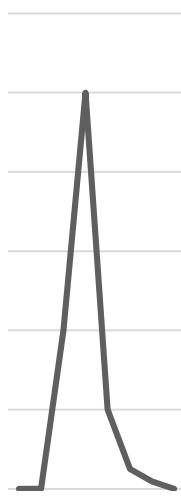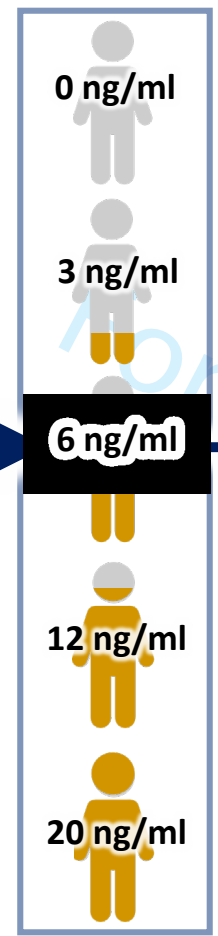

CHALLENGE

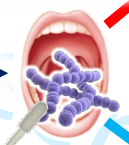

PHARYNGITIS

NO PHARYNGITIS

antibiotics

antibiotics

PENICILLIN CONTINUOUS INFUSION

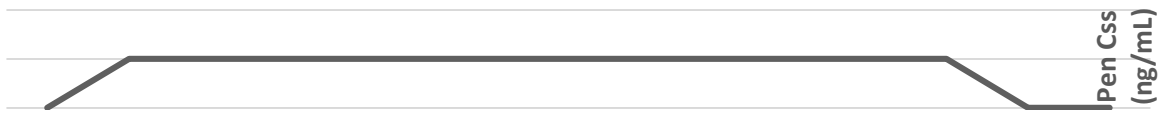

SCREENING

DOSE SELECTION AND  
RANDOMISATION

INPATIENT PERIOD

OUTPATIENT  
FOLLOW-UP



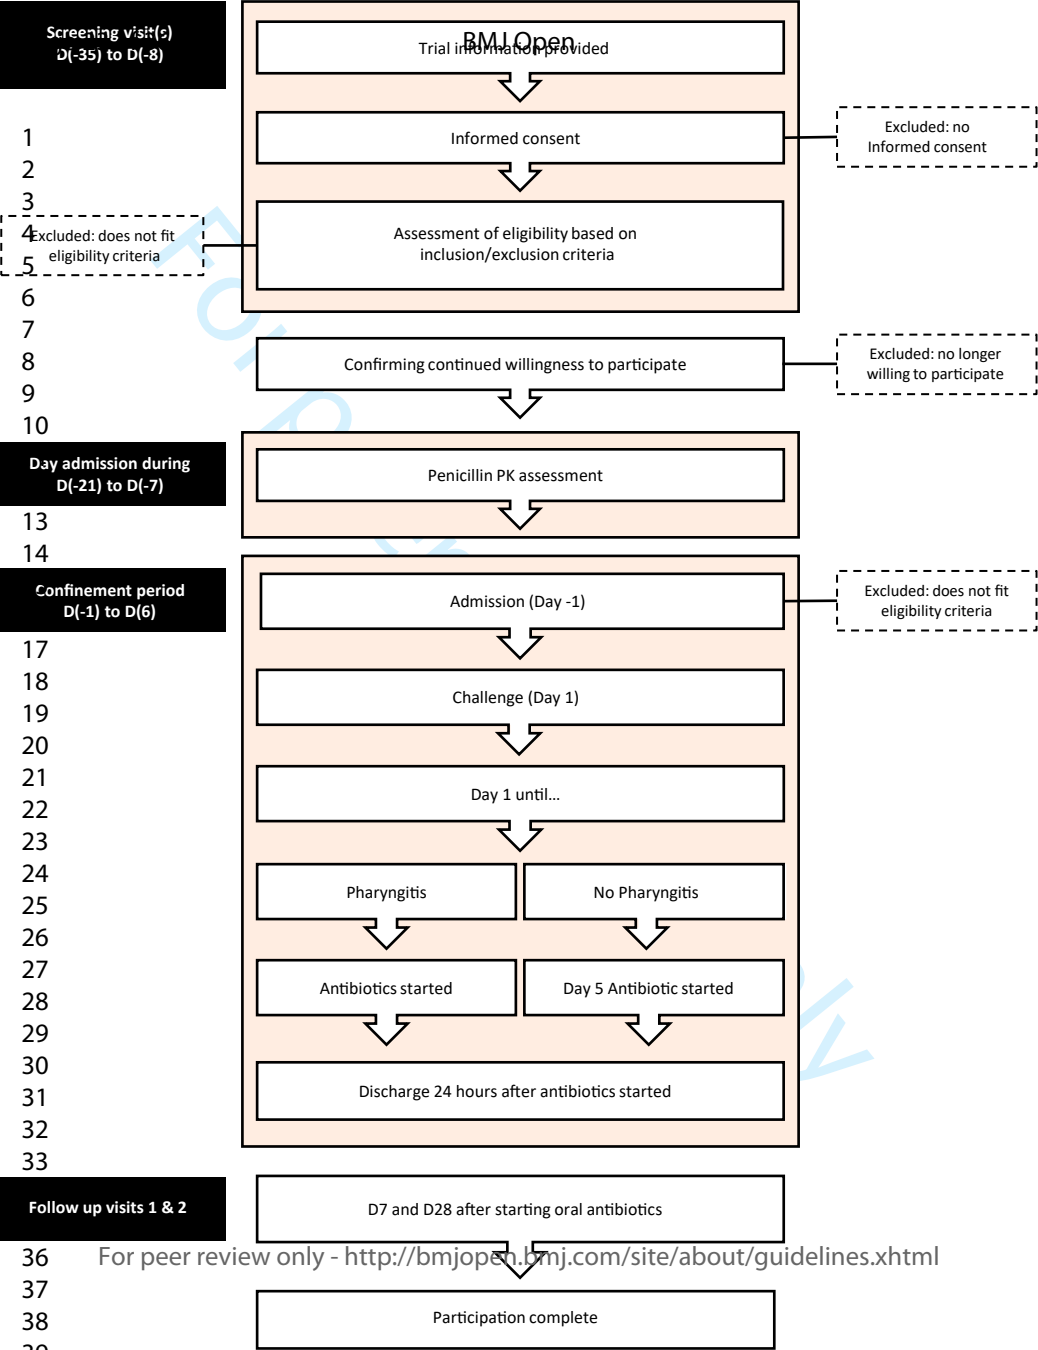

### Trial Management Group

#### Day to day delivery & conduct of the trial:

- Not independent of trial
- Remains blinded to participant allocation, efficacy and safety reports for the entire trial

#### Comprising:

- PI's delegate, PICC nurses, CRO Nursing/Medical Staff

Continue Trial: Yes/No

SAE/AE Reports

Primary outcome assessments

Individualised penicillin doses

Logistical issues

### Safety Data Review Team (SDRT)

#### Voting members (mandatory attendance) comprising:

- Independent medical monitor (Infectious Diseases Expert and SDRT Chair – preferably with experience in human challenge models)
- Independent *S. pyogenes* expert
- Independent trial statistician
- A/Prof Laurens Manning (PI)
  - Receives reports on SAE and AE with recommendations
  - Provides recommendation to continue trial after each cohort of 15 participants
  - Provides recommendation to modify treatment allocations with interim analyses with advice from non-voting team members

#### Non-voting members comprising:

##### Analytical Team (mandatory attendance):

Pharmacometrician, trial biostatistician, LCMS analyst

- Not-independent of trial
- Responsible for treatment allocation, individualised dosing & planned interim analyses
- Provides advice to voting members

#### Trial steering committee (invitees, as required attendance):

Listed CHIPS Investigators

- Not independent of trial
- Executive advice to voting members which considers the interests of trial, participants, funder, sponsor

**SUPPLEMENTARY MATERIAL**

Inclusion and exclusion criteria for eligibility to participate in the CHIPS study

**Inclusion criteria**

1. Males or females, aged 18 - 40 years (inclusive).
2. Body mass index of 18.0 - 32.0 kg/m<sup>2</sup>, inclusive, and body weight ≥ 50.0kg
3. Medically healthy, determined by medical history, physical examination, transthoracic echocardiogram, non-clinically significant laboratory profiles, vital signs, and 12-lead ECG at screening.
4. Systolic blood pressure (SBP) of 90 mmHg – 140 mmHg and diastolic blood pressure (DBP) of 40 mmHg - 90 mmHg.
5. Resting heart rate (HR) of 40-100 bpm
6. Females must be non-pregnant, non-lactating or postmenopausal.
7. Females of childbearing potential must agree to use a barrier method for the duration of study
8. Must be willing and able to read, understand, and sign the participant information and consent form. Willing to comply with all study requirements.
9. Willing to abstain from the use of mouthwash from the day of screening until the first outpatient visit.
10. Must be willing for insertion and have adequate sites for placement of indwelling intravenous cannulae and midline intravenous catheter.

**Exclusion criteria**

1. Evidence of pre-existing immunity to the challenge strain, defined for this study as a high serum IgG to a peptide comprising the first fifty amino acids of the M75 protein (N-terminal hypervariable region) measured by ELISA.
2. Currently taking penicillins or use of any penicillin-based antibiotics from screening through to the final study visit. The use of probenecid, NSAIDs, or other medications which may significantly alter penicillin PK will also not be permitted within 14 days prior to study drug administration until completion of the final follow-up visit.
3. Any corticosteroid, immunomodulator or anticoagulant use in the previous 3 months, antiplatelet use in the previous 2 weeks, or anticipated use of such drugs during the study period. Any participant currently receiving or having previously received immunosuppressive therapy, including systemic steroids including adrenocorticotrophic hormone (ACTH) or inhaled steroids in dosages which are associated with hypothalamic-pituitary-adrenal axis suppression such as 1 mg/kg/day of prednisone (or its equivalent) or chronic use of inhaled high potency corticosteroids (budesonide 800 µg or fluticasone 750 µg per day). Intranasal corticosteroid use is not allowed from 14 days prior to admission, during the confinement period, and is discouraged prior to the first outpatient visit. Topical corticosteroid use is allowed.
4. Use of prescription or non-prescription drugs (except for oral contraceptive pill in healthy adult females) and herbal supplements (such as St John's Wort) within 14 days or 5 half-lives (whichever is the longer) prior to the inoculation administration.
5. History of any clinically important cardiac, endocrine, haematological, hepatic, immunologic, metabolic, urologic, pulmonary, neurologic, dermatologic, psychiatric, and renal, or other major disease.

6. History of hospitalisation for illness within the six months prior to enrolment into study, or major surgery within the 12 months prior to enrolment into study.
7. History of tonsillectomy, adenoidectomy or splenectomy.
8. Known or suspected autoimmune disease or impairment/alteration of immune function resulting from:
  - a. Congenital or acquired immunodeficiency (including IgA deficiency)
  - b. Receipt of immunosuppressive therapy such as anti-cancer chemotherapy or radiation therapy within the preceding 6 months.
9. History of a severe drug reaction or severe allergic reaction (eg. anaphylaxis, convulsions) or clinically significant allergic disease diagnosed by a Physician.
10. Personal or family history of severe *S. pyogenes* infection or sequelae (such as acute rheumatic fever, rheumatic heart disease, post-streptococcal glomerulonephritis) or invasive *S. pyogenes* disease (toxic shock syndrome, necrotizing fasciitis, bloodstream infection, pleural empyema, meningitis, puerperal sepsis).
11. Clinically significant disease or any condition or disease that might affect drug absorption, distribution, or excretion, e.g. gastrectomy, diarrhoea.
12. Any vaccination within the last 28 days (except for COVID-19 or seasonal influenza) or use of any antibiotic therapy during the 14 days before challenge.
13. Presence of an acute infectious disease or febrile illness (e.g., sub-lingual temperature  $\geq 37.5^{\circ}\text{C}$ ) within the five days prior to challenge with *S. pyogenes* M75.
14. Significant acute or chronic infection within 14 days prior to inoculation that the Investigator deems may compromise participant safety.
15. Any clinically significant abnormal finding on biochemistry or haematology blood tests, urine analysis, ECG or transthoracic echocardiogram at screening.

16. Laboratory tests that fail to meet the following thresholds:

- a. Haematology: Haemoglobin, haematocrit, red cell count, white cell count with differentials, platelet count, MCH, MCV, MCHC— parameters within gender-specific reference intervals from the local laboratory unless deemed not clinically significant by the investigator.
- b. Clinical chemistry within gender-specific reference intervals from the local laboratory unless deemed not clinically significant by the investigator: urea, glucose, creatinine, sodium, potassium, chloride and bicarbonate, lactate dehydrogenase, calcium, total protein, magnesium, phosphate, albumin, cholesterol, and uric acid. For renal function, an eGFR >90ml/min/m<sup>2</sup> will be considered normal using the CKD-EPI without albuminuria on dipstick.
- c. Liver function tests: aspartate aminotransferase, alanine aminotransferase, alkaline phosphatase, total bilirubin, conjugated bilirubin, gamma-glutamyl transferase [ $<1.5 \times \text{ULN}$  (ALT, GGT, Total Bilirubin; local laboratory gender-specific reference ranges) will be considered not clinically significant].
- d. Negative HIV serology, Hepatitis B Surface Ag testing and hepatitis C serology.
- e. Females with a negative serum pregnancy test at screening and negative urine pregnancy test at Baseline and admission

17. Ex-smoker with a >10 pack year smoking history or a current smoker who is unable to stop smoking for the duration of the study.

18. History or presence of alcohol abuse (defined as regular alcohol consumption of more than 40g or 4 standard drinks per day) or drug habituation, or any prior intravenous usage of an illicit substance.

19. A positive urine drug test at screening or admission for confinement (e.g., amphetamines, barbiturates, benzodiazepines, cannabinoids, cocaine, and opiates) unless there is an explanation acceptable to the Investigator (e.g. the participant has stated in advance that they consumed a

1  
2  
3 prescription or OTC product which contained the detected drug) and the participant has a negative  
4  
5 urine drug screen on retest.  
6

7  
8 20. A positive alcohol breath test at screening or admission for confinement.  
9

10 21. Known hypersensitivity or other contraindication to use of penicillin, azithromycin or any other  
11  
12 beta-lactam or macrolide antibiotic(s).  
13

14 22. Known hypersensitivity to soya protein.  
15

16 23. Intolerance of throat swab procedure (exaggerated gag reflex).  
17

18 24. Participation in a research study that involved blood sampling of more than 450 mL of blood,  
19  
20 received or donated blood, blood products and/or plasma derivatives or any parenteral  
21  
22 immunoglobulin preparation within 3 months of screening.  
23

24 25. History of severe infections requiring hospitalisation for intravenous antibiotics (within the last 10  
25  
26 years). Exceptions to this would include a short course of intravenous antibiotics for appendicitis,  
27  
28 biliary sepsis, diverticulitis and cellulitis.  
29

30 26. History of cancer (except adequately treated squamous cell or basal cell carcinoma of the skin and  
31  
32 cervical intraepithelial neoplasia).  
33

34 27. Presence of implants (except for contraceptive implants) or prosthesis (e.g. artificial joints,  
35  
36 pacemakers).  
37

38 28. Receipt of another investigational product within the 30 days prior to screening involving an  
39  
40 investigational product or other intervention that might affect risk of invasive *S. pyogenes* infection  
41  
42 or compromise the integrity of the study (e.g. significant volumes of blood already taken in previous  
43  
44 study).  
45  
46  
47  
48  
49  
50  
51  
52

1  
2  
3 29. Any significant disease or disorder which, in the opinion of the Investigator, may either put the  
4 participants at risk because of participation in the study, or may influence the results of the study,  
5  
6 or the participant's ability to participate in the study.  
7  
8

9  
10 30. Any employee of the sponsor or research site personnel directly affiliated with this study or their  
11 immediate family members defined as a spouse, parent, sibling, or child whether biological or  
12  
13 legally adopted.  
14  
15  
16  
17  
18

19  
20  
21  
22  
23  
24  
25  
26  
27  
28  
29  
30  
31  
32  
33  
34  
35  
36  
37  
38  
39  
40  
41  
42  
43  
44  
45  
46  
47  
48  
49  
50  
51  
52  
53  
54  
55  
56  
57  
58  
59  
60

For peer review only



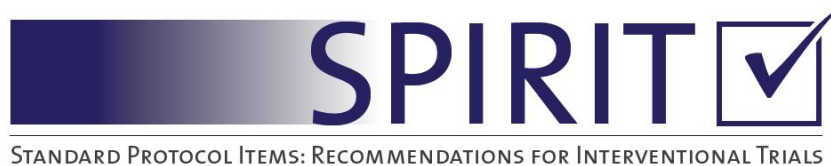

SPIRIT 2013 Checklist: Recommended items to address in a clinical trial protocol and related documents\*

| Section/item                      | Item No | Description                                                                                                                                                                                                                                                                              | Page no.  |
|-----------------------------------|---------|------------------------------------------------------------------------------------------------------------------------------------------------------------------------------------------------------------------------------------------------------------------------------------------|-----------|
| <b>Administrative information</b> |         |                                                                                                                                                                                                                                                                                          |           |
| Title                             | 1       | Descriptive title identifying the study design, population, interventions, and, if applicable, trial acronym                                                                                                                                                                             | 1         |
| Trial registration                | 2a      | Trial identifier and registry name. If not yet registered, name of intended registry                                                                                                                                                                                                     | 16        |
|                                   | 2b      | All items from the World Health Organization Trial Registration Data Set                                                                                                                                                                                                                 | 16        |
| Protocol version                  | 3       | Date and version identifier<br>- <i>Not included in manuscript but text prepared based on HREC approved CHIPS trial protocol V1.0 Dated 16 April 2021</i>                                                                                                                                |           |
| Funding                           | 4       | Sources and types of financial, material, and other support                                                                                                                                                                                                                              | 18        |
| Roles and responsibilities        | 5a      | Names, affiliations, and roles of protocol contributors                                                                                                                                                                                                                                  | 1, 18     |
|                                   | 5b      | Name and contact information for the trial sponsor                                                                                                                                                                                                                                       | 16        |
|                                   | 5c      | Role of study sponsor and funders, if any, in study design; collection, management, analysis, and interpretation of data; writing of the report; and the decision to submit the report for publication, including whether they will have ultimate authority over any of these activities | 18        |
|                                   | 5d      | Composition, roles, and responsibilities of the coordinating centre, steering committee, endpoint adjudication committee, data management team, and other individuals or groups overseeing the trial, if applicable (see Item 21a for data monitoring committee)                         | 14, Fig 3 |

|    |                                                           |     |                                                                                                                                                                                                                                                                                                                                                                                |
|----|-----------------------------------------------------------|-----|--------------------------------------------------------------------------------------------------------------------------------------------------------------------------------------------------------------------------------------------------------------------------------------------------------------------------------------------------------------------------------|
| 1  |                                                           |     |                                                                                                                                                                                                                                                                                                                                                                                |
| 2  |                                                           |     |                                                                                                                                                                                                                                                                                                                                                                                |
| 3  |                                                           |     |                                                                                                                                                                                                                                                                                                                                                                                |
| 4  | <b>Introduction</b>                                       |     |                                                                                                                                                                                                                                                                                                                                                                                |
| 5  | Background and rationale                                  | 6a  | Description of research question and justification for undertaking the trial, including summary of relevant studies (published and unpublished) examining benefits and harms for each intervention                                                                                                                                                                             |
| 6  |                                                           |     |                                                                                                                                                                                                                                                                                                                                                                                |
| 7  |                                                           |     |                                                                                                                                                                                                                                                                                                                                                                                |
| 8  |                                                           |     |                                                                                                                                                                                                                                                                                                                                                                                |
| 9  |                                                           |     |                                                                                                                                                                                                                                                                                                                                                                                |
| 10 |                                                           | 6b  | Explanation for choice of comparators                                                                                                                                                                                                                                                                                                                                          |
| 11 | Objectives                                                | 7   | Specific objectives or hypotheses                                                                                                                                                                                                                                                                                                                                              |
| 12 |                                                           |     |                                                                                                                                                                                                                                                                                                                                                                                |
| 13 | Trial design                                              | 8   | Description of trial design including type of trial (eg, parallel group, crossover, factorial, single group), allocation ratio, and framework (eg, superiority, equivalence, noninferiority, exploratory)                                                                                                                                                                      |
| 14 |                                                           |     |                                                                                                                                                                                                                                                                                                                                                                                |
| 15 |                                                           |     |                                                                                                                                                                                                                                                                                                                                                                                |
| 16 |                                                           |     |                                                                                                                                                                                                                                                                                                                                                                                |
| 17 |                                                           |     |                                                                                                                                                                                                                                                                                                                                                                                |
| 18 |                                                           |     |                                                                                                                                                                                                                                                                                                                                                                                |
| 19 |                                                           |     |                                                                                                                                                                                                                                                                                                                                                                                |
| 20 | <b>Methods: Participants, interventions, and outcomes</b> |     |                                                                                                                                                                                                                                                                                                                                                                                |
| 21 | Study setting                                             | 9   | Description of study settings (eg, community clinic, academic hospital) and list of countries where data will be collected. Reference to where list of study sites can be obtained                                                                                                                                                                                             |
| 22 |                                                           |     |                                                                                                                                                                                                                                                                                                                                                                                |
| 23 |                                                           |     |                                                                                                                                                                                                                                                                                                                                                                                |
| 24 |                                                           |     |                                                                                                                                                                                                                                                                                                                                                                                |
| 25 |                                                           |     |                                                                                                                                                                                                                                                                                                                                                                                |
| 26 |                                                           |     |                                                                                                                                                                                                                                                                                                                                                                                |
| 27 | Eligibility criteria                                      | 10  | Inclusion and exclusion criteria for participants. If applicable, eligibility criteria for study centres and individuals who will perform the interventions (eg, surgeons, psychotherapists)                                                                                                                                                                                   |
| 28 |                                                           |     |                                                                                                                                                                                                                                                                                                                                                                                |
| 29 |                                                           |     |                                                                                                                                                                                                                                                                                                                                                                                |
| 30 |                                                           |     |                                                                                                                                                                                                                                                                                                                                                                                |
| 31 |                                                           |     |                                                                                                                                                                                                                                                                                                                                                                                |
| 32 |                                                           |     |                                                                                                                                                                                                                                                                                                                                                                                |
| 33 | Interventions                                             | 11a | Interventions for each group with sufficient detail to allow replication, including how and when they will be administered                                                                                                                                                                                                                                                     |
| 34 |                                                           |     |                                                                                                                                                                                                                                                                                                                                                                                |
| 35 |                                                           |     |                                                                                                                                                                                                                                                                                                                                                                                |
| 36 |                                                           |     |                                                                                                                                                                                                                                                                                                                                                                                |
| 37 |                                                           |     |                                                                                                                                                                                                                                                                                                                                                                                |
| 38 |                                                           | 11b | Criteria for discontinuing or modifying allocated interventions for a given trial participant (eg, drug dose change in response to harms, participant request, or improving/worsening disease)                                                                                                                                                                                 |
| 39 |                                                           |     |                                                                                                                                                                                                                                                                                                                                                                                |
| 40 |                                                           |     |                                                                                                                                                                                                                                                                                                                                                                                |
| 41 |                                                           |     |                                                                                                                                                                                                                                                                                                                                                                                |
| 42 |                                                           |     |                                                                                                                                                                                                                                                                                                                                                                                |
| 43 |                                                           | 11c | Strategies to improve adherence to intervention protocols, and any procedures for monitoring adherence (eg, drug tablet return, laboratory tests)                                                                                                                                                                                                                              |
| 44 |                                                           |     |                                                                                                                                                                                                                                                                                                                                                                                |
| 45 |                                                           |     |                                                                                                                                                                                                                                                                                                                                                                                |
| 46 |                                                           |     |                                                                                                                                                                                                                                                                                                                                                                                |
| 47 |                                                           |     |                                                                                                                                                                                                                                                                                                                                                                                |
| 48 |                                                           | 11d | Relevant concomitant care and interventions that are permitted or prohibited during the trial                                                                                                                                                                                                                                                                                  |
| 49 |                                                           |     |                                                                                                                                                                                                                                                                                                                                                                                |
| 50 |                                                           |     |                                                                                                                                                                                                                                                                                                                                                                                |
| 51 | Outcomes                                                  | 12  | Primary, secondary, and other outcomes, including the specific measurement variable (eg, systolic blood pressure), analysis metric (eg, change from baseline, final value, time to event), method of aggregation (eg, median, proportion), and time point for each outcome. Explanation of the clinical relevance of chosen efficacy and harm outcomes is strongly recommended |
| 52 |                                                           |     |                                                                                                                                                                                                                                                                                                                                                                                |
| 53 |                                                           |     |                                                                                                                                                                                                                                                                                                                                                                                |
| 54 |                                                           |     |                                                                                                                                                                                                                                                                                                                                                                                |
| 55 |                                                           |     |                                                                                                                                                                                                                                                                                                                                                                                |
| 56 |                                                           |     |                                                                                                                                                                                                                                                                                                                                                                                |
| 57 |                                                           |     |                                                                                                                                                                                                                                                                                                                                                                                |
| 58 |                                                           |     |                                                                                                                                                                                                                                                                                                                                                                                |
| 59 |                                                           |     |                                                                                                                                                                                                                                                                                                                                                                                |
| 60 |                                                           |     |                                                                                                                                                                                                                                                                                                                                                                                |

|    |                                                                     |     |                                                          |       |
|----|---------------------------------------------------------------------|-----|----------------------------------------------------------|-------|
| 1  |                                                                     |     |                                                          |       |
| 2  | Participant                                                         | 13  | Time schedule of enrolment, interventions (including     | Fig 2 |
| 3  | timeline                                                            |     | any run-ins and washouts), assessments, and visits       |       |
| 4  |                                                                     |     | for participants. A schematic diagram is highly          |       |
| 5  |                                                                     |     | recommended (see Figure)                                 |       |
| 6  |                                                                     |     |                                                          |       |
| 7  | Sample size                                                         | 14  | Estimated number of participants needed to achieve       | 15    |
| 8  |                                                                     |     | study objectives and how it was determined,              |       |
| 9  |                                                                     |     | including clinical and statistical assumptions           |       |
| 10 |                                                                     |     | supporting any sample size calculations                  |       |
| 11 |                                                                     |     |                                                          |       |
| 12 |                                                                     |     |                                                          |       |
| 13 | Recruitment                                                         | 15  | Strategies for achieving adequate participant            | 10    |
| 14 |                                                                     |     | enrolment to reach target sample size                    |       |
| 15 |                                                                     |     |                                                          |       |
| 16 | <b>Methods: Assignment of interventions (for controlled trials)</b> |     |                                                          |       |
| 17 | <b>Allocation:</b>                                                  |     |                                                          |       |
| 18 |                                                                     |     |                                                          |       |
| 19 |                                                                     |     |                                                          |       |
| 20 | Sequence                                                            | 16a | Method of generating the allocation sequence (eg,        | 11    |
| 21 | generation                                                          |     | computer-generated random numbers), and list of          |       |
| 22 |                                                                     |     | any factors for stratification. To reduce predictability |       |
| 23 |                                                                     |     | of a random sequence, details of any planned             |       |
| 24 |                                                                     |     | restriction (eg, blocking) should be provided in a       |       |
| 25 |                                                                     |     | separate document that is unavailable to those who       |       |
| 26 |                                                                     |     | enrol participants or assign interventions               |       |
| 27 |                                                                     |     |                                                          |       |
| 28 |                                                                     |     |                                                          |       |
| 29 |                                                                     |     |                                                          |       |
| 30 | Allocation                                                          | 16b | Mechanism of implementing the allocation sequence        | 11    |
| 31 | concealment                                                         |     | (eg, central telephone; sequentially numbered,           |       |
| 32 | mechanism                                                           |     | opaque, sealed envelopes), describing any steps to       |       |
| 33 |                                                                     |     | conceal the sequence until interventions are             |       |
| 34 |                                                                     |     | assigned                                                 |       |
| 35 |                                                                     |     |                                                          |       |
| 36 |                                                                     |     |                                                          |       |
| 37 | Implementatio                                                       | 16c | Who will generate the allocation sequence, who will      | 11    |
| 38 | n                                                                   |     | enrol participants, and who will assign participants to  |       |
| 39 |                                                                     |     | interventions                                            |       |
| 40 |                                                                     |     |                                                          |       |
| 41 | Blinding                                                            | 17a | Who will be blinded after assignment to interventions    | 11    |
| 42 | (masking)                                                           |     | (eg, trial participants, care providers, outcome         |       |
| 43 |                                                                     |     | assessors, data analysts), and how                       |       |
| 44 |                                                                     |     |                                                          |       |
| 45 |                                                                     |     |                                                          |       |
| 46 |                                                                     | 17b | If blinded, circumstances under which unblinding is      | 11    |
| 47 |                                                                     |     | permissible, and procedure for revealing a               |       |
| 48 |                                                                     |     | participant's allocated intervention during the trial    |       |
| 49 |                                                                     |     |                                                          |       |

**Methods: Data collection, management, and analysis**

|    |                            |     |                                                                                                                                                                                                                                                                                                                                                                                                              |           |
|----|----------------------------|-----|--------------------------------------------------------------------------------------------------------------------------------------------------------------------------------------------------------------------------------------------------------------------------------------------------------------------------------------------------------------------------------------------------------------|-----------|
| 1  |                            |     |                                                                                                                                                                                                                                                                                                                                                                                                              |           |
| 2  | Data collection methods    | 18a | Plans for assessment and collection of outcome, baseline, and other trial data, including any related processes to promote data quality (eg, duplicate measurements, training of assessors) and a description of study instruments (eg, questionnaires, laboratory tests) along with their reliability and validity, if known. Reference to where data collection forms can be found, if not in the protocol |           |
| 3  |                            |     |                                                                                                                                                                                                                                                                                                                                                                                                              |           |
| 4  |                            |     |                                                                                                                                                                                                                                                                                                                                                                                                              |           |
| 5  |                            | 18b | Plans to promote participant retention and complete follow-up, including list of any outcome data to be collected for participants who discontinue or deviate from intervention protocols                                                                                                                                                                                                                    | 12        |
| 6  |                            |     |                                                                                                                                                                                                                                                                                                                                                                                                              |           |
| 7  | Data management            | 19  | Plans for data entry, coding, security, and storage, including any related processes to promote data quality (eg, double data entry; range checks for data values). Reference to where details of data management procedures can be found, if not in the protocol                                                                                                                                            | 16        |
| 8  |                            |     |                                                                                                                                                                                                                                                                                                                                                                                                              |           |
| 9  |                            |     |                                                                                                                                                                                                                                                                                                                                                                                                              |           |
| 10 | Statistical methods        | 20a | Statistical methods for analysing primary and secondary outcomes. Reference to where other details of the statistical analysis plan can be found, if not in the protocol                                                                                                                                                                                                                                     | 16        |
| 11 |                            |     |                                                                                                                                                                                                                                                                                                                                                                                                              |           |
| 12 |                            |     |                                                                                                                                                                                                                                                                                                                                                                                                              |           |
| 13 |                            | 20b | Methods for any additional analyses (eg, subgroup and adjusted analyses)                                                                                                                                                                                                                                                                                                                                     | 16        |
| 14 |                            |     |                                                                                                                                                                                                                                                                                                                                                                                                              |           |
| 15 |                            | 20c | Definition of analysis population relating to protocol non-adherence (eg, as randomised analysis), and any statistical methods to handle missing data (eg, multiple imputation)                                                                                                                                                                                                                              | 16        |
| 16 |                            |     |                                                                                                                                                                                                                                                                                                                                                                                                              |           |
| 17 |                            |     |                                                                                                                                                                                                                                                                                                                                                                                                              |           |
| 18 | <b>Methods: Monitoring</b> |     |                                                                                                                                                                                                                                                                                                                                                                                                              |           |
| 19 | Data monitoring            | 21a | Composition of data monitoring committee (DMC); summary of its role and reporting structure; statement of whether it is independent from the sponsor and competing interests; and reference to where further details about its charter can be found, if not in the protocol. Alternatively, an explanation of why a DMC is not needed                                                                        | 14, Fig 3 |
| 20 |                            |     |                                                                                                                                                                                                                                                                                                                                                                                                              |           |
| 21 |                            | 21b | Description of any interim analyses and stopping guidelines, including who will have access to these interim results and make the final decision to terminate the trial                                                                                                                                                                                                                                      | 14, Fig 3 |
| 22 |                            |     |                                                                                                                                                                                                                                                                                                                                                                                                              |           |
| 23 |                            |     |                                                                                                                                                                                                                                                                                                                                                                                                              |           |
| 24 |                            |     |                                                                                                                                                                                                                                                                                                                                                                                                              |           |
| 25 |                            |     |                                                                                                                                                                                                                                                                                                                                                                                                              |           |
| 26 |                            |     |                                                                                                                                                                                                                                                                                                                                                                                                              |           |
| 27 |                            |     |                                                                                                                                                                                                                                                                                                                                                                                                              |           |
| 28 |                            |     |                                                                                                                                                                                                                                                                                                                                                                                                              |           |
| 29 |                            |     |                                                                                                                                                                                                                                                                                                                                                                                                              |           |
| 30 |                            |     |                                                                                                                                                                                                                                                                                                                                                                                                              |           |
| 31 |                            |     |                                                                                                                                                                                                                                                                                                                                                                                                              |           |
| 32 |                            |     |                                                                                                                                                                                                                                                                                                                                                                                                              |           |
| 33 |                            |     |                                                                                                                                                                                                                                                                                                                                                                                                              |           |
| 34 |                            |     |                                                                                                                                                                                                                                                                                                                                                                                                              |           |
| 35 |                            |     |                                                                                                                                                                                                                                                                                                                                                                                                              |           |
| 36 |                            |     |                                                                                                                                                                                                                                                                                                                                                                                                              |           |
| 37 |                            |     |                                                                                                                                                                                                                                                                                                                                                                                                              |           |
| 38 |                            |     |                                                                                                                                                                                                                                                                                                                                                                                                              |           |
| 39 |                            |     |                                                                                                                                                                                                                                                                                                                                                                                                              |           |
| 40 |                            |     |                                                                                                                                                                                                                                                                                                                                                                                                              |           |
| 41 |                            |     |                                                                                                                                                                                                                                                                                                                                                                                                              |           |
| 42 |                            |     |                                                                                                                                                                                                                                                                                                                                                                                                              |           |
| 43 |                            |     |                                                                                                                                                                                                                                                                                                                                                                                                              |           |
| 44 |                            |     |                                                                                                                                                                                                                                                                                                                                                                                                              |           |
| 45 |                            |     |                                                                                                                                                                                                                                                                                                                                                                                                              |           |
| 46 |                            |     |                                                                                                                                                                                                                                                                                                                                                                                                              |           |
| 47 |                            |     |                                                                                                                                                                                                                                                                                                                                                                                                              |           |
| 48 |                            |     |                                                                                                                                                                                                                                                                                                                                                                                                              |           |
| 49 |                            |     |                                                                                                                                                                                                                                                                                                                                                                                                              |           |
| 50 |                            |     |                                                                                                                                                                                                                                                                                                                                                                                                              |           |
| 51 |                            |     |                                                                                                                                                                                                                                                                                                                                                                                                              |           |
| 52 |                            |     |                                                                                                                                                                                                                                                                                                                                                                                                              |           |
| 53 |                            |     |                                                                                                                                                                                                                                                                                                                                                                                                              |           |
| 54 |                            |     |                                                                                                                                                                                                                                                                                                                                                                                                              |           |
| 55 |                            |     |                                                                                                                                                                                                                                                                                                                                                                                                              |           |
| 56 |                            |     |                                                                                                                                                                                                                                                                                                                                                                                                              |           |
| 57 |                            |     |                                                                                                                                                                                                                                                                                                                                                                                                              |           |
| 58 |                            |     |                                                                                                                                                                                                                                                                                                                                                                                                              |           |
| 59 |                            |     |                                                                                                                                                                                                                                                                                                                                                                                                              |           |
| 60 |                            |     |                                                                                                                                                                                                                                                                                                                                                                                                              |           |

|    |                                 |     |                                                         |    |
|----|---------------------------------|-----|---------------------------------------------------------|----|
| 1  |                                 |     |                                                         |    |
| 2  | Harms                           | 22  | Plans for collecting, assessing, reporting, and         | 14 |
| 3  |                                 |     | managing solicited and spontaneously reported           |    |
| 4  |                                 |     | adverse events and other unintended effects of trial    |    |
| 5  |                                 |     | interventions or trial conduct                          |    |
| 6  |                                 |     |                                                         |    |
| 7  | Auditing                        | 23  | Frequency and procedures for auditing trial conduct,    | 14 |
| 8  |                                 |     | if any, and whether the process will be independent     |    |
| 9  |                                 |     | from investigators and the sponsor                      |    |
| 10 |                                 |     |                                                         |    |
| 11 |                                 |     |                                                         |    |
| 12 |                                 |     |                                                         |    |
| 13 | <b>Ethics and dissemination</b> |     |                                                         |    |
| 14 |                                 |     |                                                         |    |
| 15 | Research ethics                 | 24  | Plans for seeking research ethics                       | 16 |
| 16 | approval                        |     | committee/institutional review board (REC/IRB)          |    |
| 17 |                                 |     | approval                                                |    |
| 18 |                                 |     |                                                         |    |
| 19 |                                 |     |                                                         |    |
| 20 | Protocol                        | 25  | Plans for communicating important protocol              | 16 |
| 21 | amendments                      |     | modifications (eg, changes to eligibility criteria,     |    |
| 22 |                                 |     | outcomes, analyses) to relevant parties (eg,            |    |
| 23 |                                 |     | investigators, REC/IRBs, trial participants, trial      |    |
| 24 |                                 |     | registries, journals, regulators)                       |    |
| 25 |                                 |     |                                                         |    |
| 26 |                                 |     |                                                         |    |
| 27 | Consent or                      | 26a | Who will obtain informed consent or assent from         | 10 |
| 28 | assent                          |     | potential trial participants or authorised surrogates,  |    |
| 29 |                                 |     | and how (see Item 32)                                   |    |
| 30 |                                 |     |                                                         |    |
| 31 |                                 | 26b | Additional consent provisions for collection and use    |    |
| 32 |                                 |     | of participant data and biological specimens in         |    |
| 33 |                                 |     | ancillary studies, if applicable                        |    |
| 34 |                                 |     |                                                         |    |
| 35 |                                 |     | - <i>Not included in the manuscript but specified</i>   |    |
| 36 |                                 |     | <i>in the HREC approved study protocol</i>              |    |
| 37 |                                 |     |                                                         |    |
| 38 | Confidentiality                 | 27  | How personal information about potential and            | 14 |
| 39 |                                 |     | enrolled participants will be collected, shared, and    |    |
| 40 |                                 |     | maintained in order to protect confidentiality before,  |    |
| 41 |                                 |     | during, and after the trial                             |    |
| 42 |                                 |     |                                                         |    |
| 43 |                                 |     |                                                         |    |
| 44 | Declaration of                  | 28  | Financial and other competing interests for principal   | 18 |
| 45 | interests                       |     | investigators for the overall trial and each study site |    |
| 46 |                                 |     |                                                         |    |
| 47 | Access to data                  | 29  | Statement of who will have access to the final trial    | 16 |
| 48 |                                 |     | dataset, and disclosure of contractual agreements       |    |
| 49 |                                 |     | that limit such access for investigators                |    |
| 50 |                                 |     |                                                         |    |
| 51 | Ancillary and                   | 30  | Provisions, if any, for ancillary and post-trial care,  | 16 |
| 52 | post-trial care                 |     | and for compensation to those who suffer harm from      |    |
| 53 |                                 |     | trial participation                                     |    |
| 54 |                                 |     |                                                         |    |
| 55 |                                 |     |                                                         |    |
| 56 |                                 |     |                                                         |    |
| 57 |                                 |     |                                                         |    |
| 58 |                                 |     |                                                         |    |
| 59 |                                 |     |                                                         |    |
| 60 |                                 |     |                                                         |    |

|                                              |                            |     |                                                                                                                                                                                                                                                                                             |    |
|----------------------------------------------|----------------------------|-----|---------------------------------------------------------------------------------------------------------------------------------------------------------------------------------------------------------------------------------------------------------------------------------------------|----|
| 1<br>2<br>3<br>4<br>5<br>6<br>7<br>8<br>9    | Dissemination policy       | 31a | Plans for investigators and sponsor to communicate trial results to participants, healthcare professionals, the public, and other relevant groups (eg, via publication, reporting in results databases, or other data sharing arrangements), including any publication restrictions         | 16 |
| 10<br>11<br>12<br>13<br>14<br>15             |                            | 31b | Authorship eligibility guidelines and any intended use of professional writers<br>- <i>Not included in the manuscript but specified in the HREC approved study protocol</i>                                                                                                                 |    |
| 16<br>17<br>18<br>19<br>20<br>21<br>22       |                            | 31c | Plans, if any, for granting public access to the full protocol, participant-level dataset, and statistical code<br>- <i>Not included in the manuscript but specified in the HREC approved study protocol</i>                                                                                |    |
| 23                                           | <b>Appendices</b>          |     |                                                                                                                                                                                                                                                                                             |    |
| 24<br>25<br>26<br>27<br>28<br>29             | Informed consent materials | 32  | Model consent form and other related documentation given to participants and authorised surrogates<br>- <i>Not included in the manuscript but specified in the HREC approved study protocol</i>                                                                                             |    |
| 30<br>31<br>32<br>33<br>34<br>35<br>36<br>37 | Biological specimens       | 33  | Plans for collection, laboratory evaluation, and storage of biological specimens for genetic or molecular analysis in the current trial and for future use in ancillary studies, if applicable<br>- <i>Not included in the manuscript but specified in the HREC approved study protocol</i> |    |

\*It is strongly recommended that this checklist be read in conjunction with the SPIRIT 2013 Explanation & Elaboration for important clarification on the items. Amendments to the protocol should be tracked and dated. The SPIRIT checklist is copyrighted by the SPIRIT Group under the Creative Commons "[Attribution-NonCommercial-NoDerivs 3.0 Unported](https://creativecommons.org/licenses/by-nc-nd/3.0/)" license.

# BMJ Open

## Study Protocol for Controlled human infection for penicillin G against *Streptococcus pyogenes*: a double blinded, placebo controlled, randomised trial to determine the minimum concentration required to prevent experimental pharyngitis (The CHIPS trial)

|                                 |                                                                                                                                                                                                                                                                                                                                                                                                                                                                                                                                                                                                                                                                                                                                                                                                                                                                                                                                                                                                                                                                                                                                                                                                                                                                                                                                                                                                                                       |
|---------------------------------|---------------------------------------------------------------------------------------------------------------------------------------------------------------------------------------------------------------------------------------------------------------------------------------------------------------------------------------------------------------------------------------------------------------------------------------------------------------------------------------------------------------------------------------------------------------------------------------------------------------------------------------------------------------------------------------------------------------------------------------------------------------------------------------------------------------------------------------------------------------------------------------------------------------------------------------------------------------------------------------------------------------------------------------------------------------------------------------------------------------------------------------------------------------------------------------------------------------------------------------------------------------------------------------------------------------------------------------------------------------------------------------------------------------------------------------|
| Journal:                        | <i>BMJ Open</i>                                                                                                                                                                                                                                                                                                                                                                                                                                                                                                                                                                                                                                                                                                                                                                                                                                                                                                                                                                                                                                                                                                                                                                                                                                                                                                                                                                                                                       |
| Manuscript ID                   | bmjopen-2022-064022.R1                                                                                                                                                                                                                                                                                                                                                                                                                                                                                                                                                                                                                                                                                                                                                                                                                                                                                                                                                                                                                                                                                                                                                                                                                                                                                                                                                                                                                |
| Article Type:                   | Protocol                                                                                                                                                                                                                                                                                                                                                                                                                                                                                                                                                                                                                                                                                                                                                                                                                                                                                                                                                                                                                                                                                                                                                                                                                                                                                                                                                                                                                              |
| Date Submitted by the Author:   | 28-Sep-2022                                                                                                                                                                                                                                                                                                                                                                                                                                                                                                                                                                                                                                                                                                                                                                                                                                                                                                                                                                                                                                                                                                                                                                                                                                                                                                                                                                                                                           |
| Complete List of Authors:       | Hla, Thel; Telethon Kids Institute, Westfarmer's Centre of Vaccines and Infectious Diseases; University of Western Australia<br>Osowicki, Joshua; Murdoch Children's Research Institute; Royal Children's Hospital Melbourne Department of General Medicine, Infectious Diseases Unit<br>Salman, Sam; University of Western Australia; Telethon Kids Institute, Westfarmer's Centre of Vaccines and Infectious Diseases<br>Batty, Kevin; Curtin University,<br>Marsh, Julie; Telethon Kids Institute, Westfarmer's Centre of Vaccines and Infectious Diseases<br>Kado, Joseph; Telethon Kids Institute, Westfarmer's Centre of Vaccines and Infectious Diseases<br>Barr, Renae; Telethon Kids Institute, Westfarmer's Centre of Vaccines and Infectious Diseases<br>Enkel, Stephanie L.; Telethon Kids Institute, Westfarmer's Centre of Vaccines and Infectious Diseases<br>Snelling, Thomas; The University of Sydney School of Public Health<br>McCarthy, James; University of Melbourne<br>Steer, Andrew C.; Murdoch Children's Research Institute; Royal Children's Hospital Melbourne Department of General Medicine, Infectious Diseases Unit<br>Carapetis, Jonathan; Telethon Kids Institute, Westfarmer's Centre of Vaccines and Infectious Diseases; University of Western Australia<br>Manning, Laurens; Telethon Kids Institute, Westfarmer's Centre of Vaccines and Infectious Diseases; University of Western Australia |
| <b>Primary Subject Heading</b>: | Infectious diseases                                                                                                                                                                                                                                                                                                                                                                                                                                                                                                                                                                                                                                                                                                                                                                                                                                                                                                                                                                                                                                                                                                                                                                                                                                                                                                                                                                                                                   |
| Secondary Subject Heading:      | Pharmacology and therapeutics                                                                                                                                                                                                                                                                                                                                                                                                                                                                                                                                                                                                                                                                                                                                                                                                                                                                                                                                                                                                                                                                                                                                                                                                                                                                                                                                                                                                         |
| Keywords:                       | INFECTIOUS DISEASES, MICROBIOLOGY, CLINICAL PHARMACOLOGY                                                                                                                                                                                                                                                                                                                                                                                                                                                                                                                                                                                                                                                                                                                                                                                                                                                                                                                                                                                                                                                                                                                                                                                                                                                                                                                                                                              |
|                                 |                                                                                                                                                                                                                                                                                                                                                                                                                                                                                                                                                                                                                                                                                                                                                                                                                                                                                                                                                                                                                                                                                                                                                                                                                                                                                                                                                                                                                                       |

1  
2  
3  
4  
5  
6  
7  
8  
9  
10  
11  
12  
13  
14  
15  
16  
17  
18  
19  
20  
21  
22  
23  
24  
25  
26  
27  
28  
29  
30  
31  
32  
33  
34  
35  
36  
37  
38  
39  
40  
41  
42  
43  
44  
45  
46  
47  
48  
49  
50  
51  
52  
53  
54  
55  
56  
57  
58  
59  
60

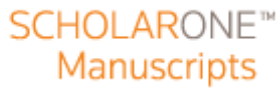



1  
2  
3 1 **TITLE**

4  
5  
6 2 **Study protocol for Controlled human infection for penicillin G against *Streptococcus pyogenes*: a double**  
7  
8 3 **blinded, placebo controlled, randomised trial to determine the minimum concentration required to**  
9  
10 4 **prevent experimental pharyngitis (The CHIPS trial)**

11  
12  
13 5 Thel K. Hla,<sup>1,2,3</sup> \* Joshua Osowicki,<sup>4,5,6</sup> Sam Salman,<sup>1,2,7</sup> Kevin T. Batty,<sup>8</sup> Julie Marsh,<sup>1</sup> Joseph Kado,<sup>1,2</sup> Renae  
14  
15 6 Barr,<sup>1</sup> Stephanie L. Enkel,<sup>1,2</sup> Thomas Snelling,<sup>9</sup> James McCarthy,<sup>10</sup> Andrew C. Steer,<sup>4,5,6</sup> Jonathan  
16  
17 7 Carapetis,<sup>1,2,11</sup> Laurens Manning<sup>1,2,3</sup>

18  
19  
20  
21 8  
22  
23 9 <sup>1</sup>Wesfarmers Centre for Vaccines and Infectious Diseases, Telethon Kids Institute, Nedlands, WA, Australia

24  
25  
26 10 <sup>2</sup>Medical School, University of Western Australia, Crawley, WA, Australia

27  
28 11 <sup>3</sup>Fiona Stanley Hospital, WA, Australia

29  
30 12 <sup>4</sup>Tropical Diseases Research Group, Murdoch Children's Research Institute, Melbourne, Victoria, Australia.

31  
32 13 <sup>5</sup>Department of Paediatrics, University of Melbourne, Victoria, Australia

33  
34 14 <sup>6</sup>Infectious Diseases Unit, Department of General Medicine, The Royal Children's Hospital Melbourne,  
35  
36 15 Victoria, Australia.

37  
38 16 <sup>7</sup>Clinical Pharmacology and Toxicology Unit PathWest, Perth, WA, Australia

39  
40 17 <sup>8</sup>Curtin Medical School, Curtin University, Bentley, WA, Australia

41  
42 18 <sup>9</sup>Sydney School of Public Health, University of Sydney, NSW, Australia

43  
44 19 <sup>10</sup>University of Melbourne, VIC, Australia

45  
46 20 <sup>11</sup>Perth Children's Hospital, WA, Australia

47  
48  
49  
50 21

51  
52  
53 22

1  
2  
3  
4  
5  
6  
7  
8  
9  
10  
11  
12  
13  
14  
15  
16  
17  
18  
19  
20  
21  
22  
23  
24  
25  
26  
27  
28  
29  
30  
31  
32  
33  
34  
35  
36  
37  
38  
39  
40  
41  
42  
43  
44  
45  
46  
47  
48  
49  
50  
51  
52  
53  
54  
55  
56  
57  
58  
59  
60

23 **\*Corresponding Author:** Dr Thel K. Hla, Telethon Kids Institute, Northern Entrance, Perth Children’s  
24 Hospital, Nedlands, Australia, WA 6009. Phone: (+618) 6319 1000; Email: [The1.Hla@telethonkids.org.au](mailto:The1.Hla@telethonkids.org.au)

26 **Keywords:** Group A Streptococcus, *Streptococcus pyogenes*, Human infection studies, Controlled human  
27 infection, Human challenge, Prevention study, Acute Rheumatic Fever, Rheumatic Heart Disease,  
28 Benzylpenicillin, Minimum Effective Dose

For peer review only

1  
2  
3 30 **ABSTRACT:**  
4  
5

6 31 **Introduction:**  
7  
8

9 32 Regular intramuscular benzathine penicillin G injections have been the cornerstone of rheumatic heart  
10  
11 33 disease (RHD) secondary prophylaxis since the 1950s. As the pharmacological correlate of protection  
12  
13 34 remains unknown, it is difficult to recommend changes to this established regimen. Determining the  
14  
15 35 minimum effective penicillin exposure required to prevent *Streptococcus pyogenes* infection will  
16  
17 36 accelerate development of new long-acting penicillins for RHD prevention as well as inform opportunities  
18  
19 37 to improve existing regimens. The CHIPS trial will address this knowledge gap by directly testing protection  
20  
21 38 afforded by different steady state plasma concentrations of penicillin in an established model of  
22  
23 39 experimental human *S. pyogenes* pharyngitis.  
24  
25  
26

27 40 **Methods and analysis:**  
28

29 41 This is a double-blinded, placebo-controlled, randomised experimental human infection study. Sixty  
30  
31 42 healthy adult volunteers aged 18 to 40 years will be recruited and randomised 1:1:1:1:1 to continuous  
32  
33 43 intravenous penicillin infusions targeting five different steady state plasma concentrations of 0 (placebo),  
34  
35 44 3, 6, 12 and 20 ng/mL via a midline catheter. Each participant's penicillin pharmacokinetic parameters will  
36  
37 45 be established prior to the challenge, to ensure accurate dosing for the continuous infusion. Following  
38  
39 46 challenge with a well-characterised strain of *S. pyogenes*, participants will be observed for up to 6 days  
40  
41 47 for development of pharyngitis and treated with antibiotics prior to discharge. The primary objective is to  
42  
43 48 determine the minimum effective steady-state plasma penicillin concentration required to prevent  
44  
45 49 experimental pharyngitis. Secondary objectives will explore systemic and mucosal immuno-inflammatory  
46  
47 50 responses during pharyngitis, bacterial colonisation dynamics, environmental contamination, and  
48  
49 51 qualitative evaluation of the participant experience.  
50  
51  
52  
53  
54  
55  
56  
57  
58  
59  
60

1  
2  
3  
4  
5  
6  
7  
8  
9  
10  
11  
12  
13  
14  
15  
16  
17  
18  
19  
20  
21  
22  
23  
24  
25  
26  
27  
28  
29  
30  
31  
32  
33  
34  
35  
36  
37  
38  
39  
40  
41  
42  
43  
44  
45  
46  
47  
48  
49  
50  
51  
52  
53  
54  
55  
56  
57  
58  
59  
60

**Ethics and dissemination:** Ethical approval has been obtained (Bellberry Human Research Ethics Committee). Findings will be reported in peer reviewed publications and presented at national/international stakeholder forums.

**Trial Registration number:** ACTRN12621000751875

For peer review only

1  
2  
3 59 **STRENGTHS AND LIMITATIONS OF THIS STUDY:**  
4  
5

- 6 60 1. The *S. pyogenes* controlled human infection model provides a unique platform for a randomised,  
7 61 double-blinded, placebo-controlled study to evaluate the minimum concentration of penicillin  
8 62 required to prevent infection.
- 9 63 2. The *S. pyogenes* challenge strain was selected after extensive characterisation efforts, including a  
10 64 reproducible penicillin minimum inhibitory concentration (12 ng/mL).
- 11 65 3. Individualised pharmacokinetic modelling will be used to determine the intravenous penicillin  
12 66 infusion dose required for each participant to achieve very low steady-state target plasma  
13 67 concentrations.
- 14 68 4. The sample size (n=60) is adequately powered to detect the anticipated effect size and far smaller  
15 69 than what would be required in any field trial designed to address these questions.
- 16 70 5. Despite the use of a standardised pharyngitis case definition to ascertain the primary outcome,  
17 71 individual assessor variability in assessment of severity and diagnosis of pharyngitis cannot be  
18 72 fully accounted for, reflecting the practical complexity encountered in clinical practice.  
19 73

## 74 INTRODUCTION

75 Recurrent infections with *Streptococcus pyogenes* (Group A beta-haemolytic Streptococcus; *S. pyogenes*)  
76 are associated with development of acute rheumatic fever (ARF) and rheumatic heart disease (RHD).<sup>1</sup> RHD  
77 affects 40.5 million people globally and causes 306,000 deaths annually, mostly children and young adults  
78 living in low- and middle-income countries.<sup>2, 3</sup> The efficacy of intramuscular (IM) injections of 1.2 million  
79 units (MU; 900 mg) benzathine benzylpenicillin G (BPG) every three to four weeks for RHD secondary  
80 prophylaxis was first demonstrated in the 1950s and remains the only proven and cost-effective  
81 protection against recurrent infection and progressive RHD.<sup>4-6</sup> After deep IM injection, BPG is slowly  
82 hydrolysed to benzylpenicillin G (penicillin) and absorbed into the plasma.<sup>7</sup>

83 While secondary prophylaxis has been shown to be moderately effective in adherent individuals, poor  
84 adherence to painful monthly intramuscular injections (recommended for a minimum of 5 years) limits  
85 coverage of secondary prophylaxis and its overall effectiveness.<sup>6, 8-10</sup> There is an urgent need to improve  
86 penicillin formulations for patients with ARF and RHD. Stakeholder consultations with consumers and RHD  
87 experts have consistently identified the ideal characteristics for secondary prophylaxis which include  
88 reducing dose frequency (ideally every 3-6 months), reducing pain of administration, alternative delivery  
89 strategies (including injectable implants or non-injection methods) and cold chain independence as key  
90 aspirations for an acceptable product.<sup>8, 11</sup> However, as the pharmacological correlate of protection  
91 remains unknown, it is difficult to recommend changes to the established regimen.

92 It has conventionally been assumed that critical pharmacological correlate for prevention of *S. pyogenes*  
93 infections is the time between IM injections that plasma penicillin concentrations remain above 0.02 mg/L  
94 (20 ng/mL), a typical minimum inhibitory concentration (MIC) for *S. pyogenes* isolates.<sup>12</sup> However,  
95 emerging evidence from a number of high risk settings demonstrates that even the most adherent  
96 patients do not maintain these target concentrations for the majority of the interval between BPG

1  
2  
3 97 injections.<sup>13,14</sup> Given the apparent efficacy in adherent patients, it is possible that current regimens of BPG  
4  
5 98 confer protection at lower, sustained inter-injection levels of plasma penicillin. Alternatively, transient  
6  
7 99 peaks in serum concentration may be sufficient as an intermittent presumptive treatment.  
8  
9

10  
11 100 The opportunity to directly test the former hypothesis under the necessary controlled conditions has  
12  
13 101 arisen with the advent of a new experimental human infection model of *S. pyogenes* pharyngitis in healthy  
14  
15 102 adults.<sup>15</sup> The CHIPS trial will address a key knowledge gap by directly testing protection against  
16  
17 103 experimental human pharyngitis, in relation to different steady state plasma concentrations of penicillin,  
18  
19 104 to inform strategies for pharmacological secondary prophylaxis of RHD, including development of new  
20  
21 105 and more effective long-acting penicillin formulations or optimising dose and dosing intervals with  
22  
23 106 currently available formulations.  
24  
25

## 26 27 107 **METHODS AND ANALYSIS:**

### 28 29 30 108 **Study Design**

31  
32  
33 109 The CHIPS trial is a double-blinded, placebo-controlled, randomised human infection study to determine  
34  
35 110 the minimum effective steady-state plasma penicillin concentration required to prevent pharyngitis  
36  
37 111 following direct application of *S. pyogenes* to the oropharynx (Figure 1). Based on the successful human  
38  
39 112 challenge model developed in the CHIVAS-M75 study,<sup>15</sup> healthy adult volunteers will be recruited through  
40  
41 113 a private contract research organisation (CRO) and inoculated with the same *S. pyogenes emm75* strain.  
42  
43 114 A total of 60 participants will be recruited in 4 cohorts of 15 volunteers. Participants will be randomised  
44  
45 115 1:1:1:1 to receive continuous IV infusions of penicillin at 5 possible steady state plasma concentrations  
46  
47 116 of 0 (placebo), 3, 6, 12 and 20 ng/mL. The study will be conducted within the CRO facility in Perth, Western  
48  
49  
50 117 Australia, with clinical support from a nearby tertiary hospital.  
51  
52

### 53 118 **Patient and public involvement**

54  
55  
56  
57  
58  
59  
60

1  
2  
3 119 The need to improve RHD secondary prophylaxis is underpinned by extensive consumer engagement  
4  
5 120 which has consistently identified pain and frequency associated with BPG injections as barriers to  
6  
7 121 adherence.<sup>8, 16, 17</sup> However, as this is a human infection study involving healthy volunteers, there is limited  
8  
9 122 scope for health consumer input into the design and implementation of the study. While the methodology  
10  
11 123 of our study involves *S. pyogenes* pharyngitis and its prevention using continuous penicillin infusion, the  
12  
13 124 focus of our research and its intended beneficiaries are not sufferers of pharyngitis, but rather secondary  
14  
15 125 prophylaxis for those living with ARF/RHD. Due to this indirect connection, involvement of target patient  
16  
17 126 population would be premature. For the healthy volunteers who participate in the study, they will be  
18  
19 127 made aware of results of this trial and informed of how to access the published findings.  
20  
21  
22  
23

#### 24 128 **Study objectives and outcomes**

25  
26  
27 129 The primary objective is to determine the minimum plasma penicillin concentration associated with  
28  
29 130 protection against experimental *S. pyogenes* pharyngitis following the challenge, assessed by the  
30  
31 131 development of acute symptomatic pharyngitis (primary outcome) during the confinement period. This is  
32  
33 132 assessed using the pharyngitis case definition from CHIVAS-M75 study, incorporating elements of clinical  
34  
35 133 prediction rules based on Centor and McIsaac scores, change in tonsil size and real time molecular point-  
36  
37 134 of-care test for *S. pyogenes* (ID NOW Strep A2, Abbott).<sup>15</sup> Secondary objectives are identification of plasma  
38  
39 135 penicillin concentration required to prevent pharyngeal colonisation of *S. pyogenes*, and salivary penicillin  
40  
41 136 concentration required to prevent *S. pyogenes* pharyngitis or colonisation. Exploratory objectives include  
42  
43 137 characterisation of immune responses and inflammatory profiles comparing participants across penicillin  
44  
45 138 dose bands and pharyngitis outcome, examination of *S. pyogenes* potential for environmental  
46  
47 139 contamination (with relevance to disease transmission) and exploration of motivations and the lived  
48  
49 140 experiences of the volunteers who take part in human infection studies (listed in Table 1 along with  
50  
51 141 outcome/endpoint assessments).  
52  
53  
54  
55  
56  
57  
58  
59  
60



142

143 Table 1: Study objectives and outcomes

|                    | Objective(s)                                                                                                                                                                                                                                                                                                                                                                                                                                                                                                                                                                                                                                                                                                                                                                   | Outcome(s)/ Endpoint(s)                                                                                                                                                                                                                                                                                                                                                                                                 |
|--------------------|--------------------------------------------------------------------------------------------------------------------------------------------------------------------------------------------------------------------------------------------------------------------------------------------------------------------------------------------------------------------------------------------------------------------------------------------------------------------------------------------------------------------------------------------------------------------------------------------------------------------------------------------------------------------------------------------------------------------------------------------------------------------------------|-------------------------------------------------------------------------------------------------------------------------------------------------------------------------------------------------------------------------------------------------------------------------------------------------------------------------------------------------------------------------------------------------------------------------|
| <b>Primary</b>     | To determine the minimum plasma penicillin concentration required to prevent acute symptomatic <i>S. pyogenes</i> pharyngitis following a direct oropharyngeal challenge with <i>S. pyogenes</i> M75                                                                                                                                                                                                                                                                                                                                                                                                                                                                                                                                                                           | Development of <i>S. pyogenes</i> pharyngitis during confinement period, according to a pre-defined clinical and laboratory criteria                                                                                                                                                                                                                                                                                    |
| <b>Secondary</b>   | <ol style="list-style-type: none"> <li data-bbox="391 705 888 842">1. To identify the target plasma penicillin concentration required to prevent <i>S. pyogenes</i> colonisation of the pharynx</li> <li data-bbox="391 989 888 1125">2. To identify the target salivary penicillin concentration required to prevent <i>S. pyogenes</i> pharyngitis or colonisation</li> </ol>                                                                                                                                                                                                                                                                                                                                                                                                | <p data-bbox="899 705 1425 947">Development of <i>S. pyogenes</i> colonisation following challenge, defined as <i>S. pyogenes</i> M75 isolation from throat swab in absence of signs and symptoms of clinical pharyngitis after completing antibiotic treatment at conclusion of confinement period.</p> <p data-bbox="899 989 1425 1052">Assays to detect penicillin concentration in saliva from all participants</p> |
| <b>Exploratory</b> | <ol style="list-style-type: none"> <li data-bbox="391 1167 888 1346">1. To characterise plasma humoral and cellular immunological profiles of immune response to experimental challenge with <i>S. pyogenes</i> in healthy participants</li> <li data-bbox="391 1377 888 1524">2. To characterise plasma inflammatory (CRP and procalcitonin) and metabolomic profiles of <i>S. pyogenes</i> pharyngitis</li> <li data-bbox="391 1556 888 1734">3. To identify whether Cystatin C- based markers of renal function improve estimates of penicillin G renal clearance compared with creatinine-based measures</li> <li data-bbox="391 1766 888 1871">4. To explore microbiological and local factors associated with <i>S. pyogenes</i> adhesion to tonsillar mucosa</li> </ol> | <p data-bbox="899 1167 1425 1272">Laboratory assays to measure immunological and inflammatory responses to the challenge</p> <p data-bbox="899 1377 1425 1451">Measurement of inflammatory markers from blood samples</p> <p data-bbox="899 1556 1425 1629">Measurement of Cystatin-C from blood samples</p> <p data-bbox="899 1766 1425 1839">Laboratory assays to measure mucosal response</p>                        |

- 1  
2  
3  
4  
5  
6  
7  
8  
9  
10  
11  
12  
13  
14  
15  
16  
17  
18  
19  
20  
21
- |    |                                                                                                                                                                     |                                                                                         |
|----|---------------------------------------------------------------------------------------------------------------------------------------------------------------------|-----------------------------------------------------------------------------------------|
| 5. | To explore <i>S. pyogenes</i> transcriptomic changes in response to penicillin exposure in <i>S. pyogenes</i> pharyngitis                                           | Transcriptomic analyses/ genetic sequencing of <i>S. pyogenes</i> isolates              |
| 6. | To investigate potential environmental contamination of <i>S. pyogenes</i> via large respiratory droplets, airborne small respiratory droplets, and surface contact | Microbiological and culture analysis of participants' contact surfaces and surroundings |
| 7. | To explore motivations, attitudes, and experiences of participating in clinical trials and human challenge studies                                                  | Responses to questionnaires administered during study period by participants            |
- 

144

## 145 Recruitment and eligibility

146 A database of healthy volunteers maintained by the CRO will be used for recruitment of study participants,  
147 along with multi-media advertisements (e.g., social media platforms of CRO and affiliated institutions)  
148 using materials approved by the ethics committee. Participants will be financially reimbursed of a value  
149 determined to be satisfactory by the ethics committee. Healthy adult males and non-pregnant, non-  
150 lactating females aged 18 – 40 years without pre-existing risk factors for severe *S. pyogenes* disease will  
151 be recruited. Strict eligibility criteria are in place to mitigate risks to potential participants (full eligibility  
152 criteria detailed in Supplementary Material 1; copy of the participant information sheet and consent form  
153 provided in Supplementary Material 2). In addition to usual 'healthy adult' inclusion and exclusion criteria,  
154 medical history and physical examination, prospective participants will undertake electrocardiography  
155 and transthoracic echocardiography to rule out undiagnosed sub-clinical cardiac pathology. They will also  
156 undergo screening throat swabs and a serum *emm75* type-specific serology to exclude carriage and prior  
157 immunity to *S. pyogenes emm75* strains, respectively.

## 158 Study Interventions

1  
2  
3 159 *Dose-finding pharmacokinetic study*  
4  
5

6 160 The overall journey of a participant from screening to completion of follow up is illustrated in Figure 2. At  
7  
8 161 least several days prior to the inpatient challenge admission, each participant will have an individual  
9  
10 162 pharmacokinetic dose-finding assessment. A 600 mg bolus dose of intravenous penicillin will be  
11  
12 163 administered and serial venous blood samples will be collected for plasma penicillin concentration  
13  
14 164 measurements at baseline, then 15, 30, 60, 120, 180, 240, and 360 minutes afterwards. Clearance and  
15  
16 165 volume of distribution will be derived to enable calculation of individualised IV penicillin continuous  
17  
18 166 infusion doses to attain the randomised target concentration for the *S. pyogenes* challenge admission.  
19  
20  
21

22 167 *Randomisation procedure*  
23  
24

25 168 First 45 participants will be randomised 1:1:1:1:1 to one of 5 different target steady state concentrations  
26  
27 169 (0 [placebo], 3, 6, 12 and 20 ng/mL). To ensure there is at least one participant in each concentration for  
28  
29 170 each group of 5 and 3-per-concentration in each cohort of 15 participants, the volunteers will be block  
30  
31 171 randomised in groups of 5 following an allocation sequence generated by the study statistician and stored  
32  
33 172 on a secure server, accessible only to the unblinded pharmacy and analytical team members. All clinical  
34  
35 173 staff and participants will remain blinded to the treatment allocation (concentration level) for the duration  
36  
37 174 of the study.  
38  
39  
40

41 175 *Challenge procedures*  
42  
43

44 176 Participants are considered enrolled from the time of commencing the penicillin infusion via a midline  
45  
46 177 intravenous catheter on the day of admission (Day -1). On the day of challenge (Day +1), a sterile Dacron  
47  
48 178 swab is dipped in a 1mL single-dose vial containing  $1-3 \times 10^5$  colony-forming units (CFU) of *emm75 S.*  
49  
50 179 *pyogenes* and applied directly to the participant's oropharynx. The single-dose vials will be produced  
51  
52 180 according to the principles of Good Manufacturing Practice.<sup>18, 19</sup> Each participant will be challenged once  
53  
54  
55  
56  
57  
58  
59  
60

1  
2  
3 181 only, using a standardised procedure analogous to a diagnostic throat swab done 'in reverse', as  
4  
5 182 previously described.<sup>18</sup> Participants will be fasted for 90 minutes before and after challenge.  
6  
7

8 183 *Confinement and discharge*  
9

10  
11 184 Following challenge, participants will remain inpatients at the CRO facility until reaching the primary  
12  
13 185 pharyngitis outcome or until 5 days after challenge if they remain asymptomatic, whichever occurs first.  
14  
15 186 The penicillin infusion will stop at that time and a separate oral antibiotic course will be initiated  
16  
17 187 (azithromycin 500 mg once daily for 5 days<sup>20</sup>). All participants will be monitored as inpatients for at least  
18  
19 188 24 hours after their first dose of oral antibiotic prior to discharge. Subsequent safety follow-up visits will  
20  
21 189 occur 7 and 28 days after the first dose of oral antibiotic. Participants will return unused antibiotic tablets  
22  
23 190 which will allow monitoring of adherence to the remainder of oral treatment.  
24  
25  
26

27 191 *Adding/removing treatment arms*  
28

29  
30 192 After 45 participants (3 cohorts), an interim analysis will be performed. Provided that the pre-specified  
31  
32 193 statistical thresholds are met, the investigators may adjust the target concentration arms (while retaining  
33  
34 194 the placebo arm) for the last cohort of 15 participants (to concentrations up to 100 ng/mL) to increase  
35  
36 195 the precision of the minimum effective concentration estimate.  
37  
38  
39

40 196 *Pharmaceutical handling of penicillin*  
41

42  
43 197 For each participant, individual pharmacokinetic parameters will inform the penicillin dose required to  
44  
45 198 prepare the intravenous infusion bags for all possible dose allocations. After randomisation, infusion bags  
46  
47 199 will be prepared at an aseptic compounding facility according to the individualised calculated dose to  
48  
49 200 attain the allocated steady state plasma penicillin concentration. The stability of benzylpenicillin in 0.9%  
50  
51 201 w/v sodium chloride IV infusion bags and the optimum sodium citrate concentration has been formally  
52  
53 202 evaluated for the CHIPS trial (manuscript accepted<sup>21</sup>). These stability studies demonstrated excellent  
54  
55  
56  
57

1  
2  
3 203 chemical preservation of buffered benzylpenicillin at room temperature, with <1% degradation after 24  
4  
5 204 hours for benzylpenicillin 25 µg/mL in sodium citrate 100 µg/mL in 0.9% w/v sodium chloride solution,  
6  
7 205 whether exposed to or protected from artificial light. Continuous infusion bags will be routinely changed  
8  
9  
10 206 every 24 hours. A sample of remnant fluid from each bag will be collected, stored at -80 °C, and assayed  
11  
12 207 to confirm the expected stability of penicillin over the 24-hour period.

### 15 208 *Measurement of possible environmental contamination and transmission potential*

16  
17  
18 209 At 3 post-challenge timepoints (+24, +36 and +48 hours), Colistin Nalidixic Acid (CNA) agar plates will be  
19  
20 210 placed in the participant's room for 4 hours to capture potential droplet or airborne transmission of *S.*  
21  
22 211 *pyogenes*. Swabs will also be taken of the participant's surroundings and personal devices (approximately  
23  
24 212 25cm<sup>2</sup>). To detect droplet transmission potential, participants will read a short text at each timepoint with  
25  
26  
27 213 CNA plates placed at varying lengths (30cm, 90cm and 180cm). All swabs and CNA plates collected will  
28  
29 214 undergo transfer and processing for microbial culture for beta-haemolytic Streptococci (BHS) as per  
30  
31 215 Clinical and Laboratory Standards Institute (CLSI) standards, including use of positive and negative  
32  
33 216 controls. If no growth is detected after 24 hours, incubation will be extended for another 24 hours.  
34  
35  
36 217 Presence of *S. pyogenes* from beta-haemolytic colonies will be confirmed with agglutination kits using  
37  
38 218 group specific antigens (Streptex™, Thermo Scientific).

### 41 219 *Study participants' experience*

42  
43  
44 220 Participants will complete surveys at 3 timepoints: admission, at diagnosis of pharyngitis or Day +3 (if  
45  
46 221 asymptomatic), and immediately prior to discharge. These surveys will collect qualitative data using  
47  
48 222 standardised questionnaires evaluating participant's motivation for involvement in the study and how  
49  
50 223 expectations or concerns held prior to admission compared to the experience. In addition, participants  
51  
52 224 will also be asked to keep a diary and record elements of their challenge admission specific to their  
53  
54  
55  
56  
57

225 experience of participating in a human challenge study in a non-structured form. This qualitative data will  
226 be collected and collated into themes for analysis and reporting.

227

## 228 **Governance**

229 A unique governance structure, incorporating a Safety Data Review Team (SDRT), has been set up to meet  
230 the needs of this study as illustrated in Figure 3. Day-to-day conduct of the study and reporting of its  
231 progress to the SDRT is done by the trial management group whose members will remain blinded to the  
232 randomised allocation until after completion of study. SDRT has voting members (chaired by an  
233 independent expert) who make decisions regarding continuation of trial after each cohort of 15 is  
234 completed, with non-voting members from the analytical team and trial steering committee providing an  
235 advisory role. An independent study monitor will be engaged who will ensure that the investigation is  
236 conducted according to the protocol and regulatory requirements. Strict data management plan will be  
237 adhered to protect participant confidentiality in compliance with Good Clinical Practice guidelines.

## 238 **Safety**

239 As in the CHIVAS-M75<sup>15</sup> study, the following will be considered medically significant events in addition to  
240 the standard definitions – local and systemic complications of *S. pyogenes* infection, autoimmune  
241 sequelae of *S. pyogenes* infection (such as ARF, RHD, and glomerulonephritis), recurrent pharyngitis in  
242 participants caused by the challenge strain, and secondary cases of *S. pyogenes* infection with the  
243 challenge strain in non-participants.

244 *Participant safety during confinement:* Participants will be monitored closely during the confinement  
245 period in a purpose-built clinical trials facility with 24-hours clinical staffing and twice daily reviews. All  
246 adverse events will be recorded in real time and any serious adverse event (SAE) will be reported to the

247 SDRT within 24 hours of their occurrence. Starting a new cohort of participants will require approval by  
248 the SDRT following an interim review after each cohort's confinement period is completed.

249 *Long term safety:* The risk of long-term carriage of *S. pyogenes* is minimised with treatment using a non-  
250 beta-lactam antibiotic (azithromycin) prior to discharge. Additional reassurance comes from the CHIVAS-  
251 M75 study in which none of 25 participants challenged with the *emm75* strain had developed persistent  
252 carriage, systemic or autoimmune complications of *S. pyogenes* at completion of 6 months follow up.<sup>15</sup>  
253 The risk of secondary spread of infection from participants will be negligible as they will be confined in a  
254 clinical trial facility with stringent infection control measures and will have had 24 hours of oral antibiotic  
255 treatment by the time of discharge back to community (in keeping with public health recommendations  
256 for school exclusion).

### 257 **Challenge strain**

258 The *S. pyogenes* challenge strain (*emm75*, M75) was isolated from a patient with pharyngitis in 2011. It  
259 has been extensively characterised and selected for its suitability for human challenge. It is an infrequent  
260 *emm*-type in most published series but reliably causes pharyngitis. The particular challenge strain has  
261 favourable antibiotic susceptibility, and does not have a virulence profile typical of hypervirulent strains.<sup>19</sup>  
262 The characterisation, selection, manufacture, storage, and quality assurance approach for the *emm75*  
263 challenge strain *S. pyogenes* has previously been described.<sup>15, 18</sup> In the CHIVAS-M75 study, at the starting  
264 dose level of  $1-3 \times 10^5$  CFU in each single-dose vial, the pharyngitis attack rate was 85%.<sup>15</sup>

### 265 **Sample size calculation**

266 Based on simulations, a maximum of 60 participants are required (recruited in 4 cohorts of equal size;  
267 starting with 5 treatment arms) to detect a minimum effective dose (MED) between 0-20 ng/mL, with  
268 >80% power and Type 1 error <5%. Trial simulations were based on: (i) an anticipated 25% of placebo  
269 participants symptom-free at the end of study Day +5; (ii) a monotonic normal dynamic linear model with

1  
2  
3 270 weakly informative prior distributions; (iii) equal allocation to all treatment arms; (iv) interim analyses  
4  
5 271 after each cohort has completed (i.e. every 15 participants); (v) a high target of 90% symptom-free and a  
6  
7 272 low target of 80% symptom-free in determining the MED; and (vi) stopping rules for success if the  
8  
9 273 posterior probability that the MED is greater than the low target is greater than 80% (i.e.  $\text{pr}(\text{MED} > \text{low}$   
10  
11 274  $\text{target}) > 80\%$ ) and for futility if the posterior probability that the MED is greater than the upper target is  
12  
13 275 less than 10% (i.e.  $\text{pr}(\text{MED} > \text{upper target}) < 10\%$ ). Trial operating characteristics were calculated for 8  
14  
15 276 scenarios ranging from null efficacy to MED detected at the highest dose level.

### 19 277 **Data analysis plan**

21  
22 278 Study data will be collected using paper and electronic source documents and managed using a secure  
23  
24 279 institution hosted electronic database (Research Electronic Data Capture, USA). For the primary endpoint,  
25  
26 280 Bayesian analyses will be performed on the accumulating data after each cohort completes study Day +5  
27  
28 281 and the primary pharyngitis endpoint is determined for each participant. It is anticipated that up to 25%  
29  
30 282 of participants in the placebo arm may remain free from pharyngitis. A monotonic normal dynamic linear  
31  
32 283 model will be used to assess the dose response and estimate the MED. After the completion of the second  
33  
34 284 (n=30) and third (n=45) cohorts, we will evaluate stopping rules for success ( $\text{pr}(\text{MED} > \text{low target}) > 80\%$ )  
35  
36 285 and for futility ( $\text{pr}(\text{MED} > \text{upper target}) < 10\%$ ). All secondary outcomes will be summarised by treatment  
37  
38 286 arm using appropriate statistics, including mean and standard deviation for continuous variables with  
39  
40 287 symmetrical distributions or median and interquartile range for asymmetric distributions. Categorical  
41  
42 288 variables will be summarised using frequencies and percentages.

### 47 289 **ETHICS AND DISSEMINATION**

49  
50 290 This protocol (Universal Trial Number U1111-1264-9535) has been reviewed and approved by the  
51  
52 291 Bellberry Human Research Ethics Committee (Ref: 2021-03-295) and is registered on the Australian New  
53  
54 292 Zealand Clinical Trials Registry ([www.anzctr.org.au](http://www.anzctr.org.au), ACTRN12621000751875). The sponsor is the Telethon  
55  
56  
57  
58  
59  
60



1  
2  
3 293 Kids Institute and the study is indemnified under the existing institutional insurance policy. The results of  
4  
5 294 the study will be of national and international significance. Our team has strong links to stakeholder  
6  
7 295 groups and national and international profiles that will ensure dissemination of the results in peer-  
8  
9  
10 296 reviewed journals and presentation at relevant congresses.

## 11 12 13 297 **DISCUSSION**

14  
15 298 The Global Resolution on Rheumatic Fever and Rheumatic Heart Disease calls for new technological  
16  
17 299 approaches to improving global RHD control, including the “development of a long-acting formulation of  
18  
19 300 penicillin that might improve secondary prophylactic regimens”.<sup>22</sup> The CHIPS trial aims to address a key  
20  
21 301 knowledge gap toward achieving this goal, by challenging the dogma regarding what is the MED of  
22  
23 302 penicillin for successful prevention of *S. pyogenes* infection and secondary RHD prophylaxis.

24  
25  
26  
27 303 Experimental human infection, or challenge studies, have been core platforms for infectious diseases  
28  
29 304 research since at least Edward Jenner’s 18<sup>th</sup> century smallpox vaccine studies.<sup>23</sup> In recent decades,  
30  
31 305 reinforced by rigorous ethical frameworks and independent safety reviews, modern human challenge  
32  
33 306 trials have contributed to accelerating development of new drugs, vaccines, and diagnostics.<sup>23, 24</sup> The  
34  
35 307 CHIPS trial is the first to take advantage of the successful establishment of a human pharyngitis model in  
36  
37 308 the CHIVAS-M75 study.<sup>15</sup> Although human challenge trials have previously tested the efficacy of drugs,  
38  
39 309 the use of randomised steady-state plasma concentration levels of penicillin aiming to demonstrate a  
40  
41 310 prophylactic threshold is an innovative approach among modern human challenge trials.<sup>23-25</sup> Even with a  
42  
43 311 sample size of 60 participants, our study is adequately powered to detect the anticipated effect size.<sup>26-29</sup>  
44  
45 312 The minimum effective dose of penicillin established in the present study is expected to provide evidence  
46  
47 313 that sustained low plasma penicillin concentrations (<20 ng/mL) do prevent *S. pyogenes* infection while  
48  
49 314 shedding further light on the relationship between serum and tissue penicillin concentrations and the role  
50  
51 315 they might play in host-pathogen interaction leading to pharyngitis. Pharmacokinetic correlates of  
52  
53  
54  
55  
56  
57  
58  
59  
60

1  
2  
3 316 protection identified will inform the target product profile for long-acting penicillin formulations and the  
4  
5 317 development of implants or depot injections that provide a 'smoother' exposure profile to overcome the  
6  
7 318 need for frequent painful injections associated with low adherence rates.<sup>6, 8, 30</sup>  
9  
10 319 Findings from the CHIPS trial may have wider applications beyond RHD secondary prophylaxis, for other  
11  
12 320 indications for penicillin prophylaxis, such as recurrent lower extremity cellulitis. *S. pyogenes* is a leading  
13  
14 321 cause of erysipelas and cellulitis, the latter commonly affecting older adults living in developed  
15  
16 322 economies.<sup>31-34</sup> In the United States alone, it is estimated to cost \$3.7 billion in healthcare expenditure  
17  
18 323 from 14.5 million cases annually.<sup>35</sup> In addition, improved long-acting formulations of penicillin could have  
19  
20 324 advantages for treatment of certain conditions including syphilis and other treponemal syndromes.  
21  
22 325 Potential limitations of our approach include the uncertain generalisability of a MED related to a single  
23  
24 326 strain. Nonetheless, notwithstanding recent concerns stemming from rare penicillin binding protein  
25  
26 327 mutations, *S. pyogenes* remains universally susceptible to penicillin.<sup>36-38</sup> The relationship between *in vitro*  
27  
28 328 MIC of the *emm75* challenge strain and the MED determined in the CHIPS trial will still be relevant to  
29  
30 329 considering other strains with different MICs. Likewise, it is uncertain whether findings in healthy  
31  
32 330 volunteers are generalisable to the relevant patient groups for RHD secondary prophylaxis. Certainly,  
33  
34 331 future research will be needed to validate novel regimens of existing preparations or novel formulations  
35  
36 332 which are underpinned by new knowledge obtained from this trial across a broad range of target patient  
37  
38 333 populations. The CHIPS trial will also be a platform to build on insights into host-pathogen interactions  
39  
40 334 already emerging from the CHIVAS-M75 trial, to exploring environmental determinants of transmission,  
41  
42 335 and adding to the literature exploring the experience of participants in human challenge trials.<sup>39, 40</sup>  
43  
44  
45  
46  
47  
48  
49

50 336 **AUTHORS' CONTRIBUTIONS**  
51  
52  
53  
54  
55  
56  
57  
58  
59  
60

1  
2  
3 337 *Conceptualisation and design of the study:* Laurens Manning, Jonathan Carapetis, Joshua Osowicki,  
4  
5 338 Andrew Steer, Julie Marsh, Kevin Batty, Sam Salman, James McCarthy, Thomas Snelling, Joseph Kado, Thel  
6  
7 339 Hla

9  
10 340 *Data analysis plan:* Julie Marsh, Laurens Manning, Thel Hla

12  
13 341 *Drafting of the protocol:* Thel Hla, Laurens Manning, Joshua Osowicki, Sam Salman, Julie Marsh, Renae  
14  
15 342 Barr, Stephanie Enkel, Kevin Batty

17  
18 343 *Critical revisions of the manuscript:* Thel Hla, Laurens Manning, Joshua Osowicki, Sam Salman, Kevin Batty,  
19  
20 344 Julie Marsh, Joseph Kado, Renae Barr, Stephanie Enkel, Thomas Snelling, James McCarthy, Andrew Steer,  
21  
22 345 Jonathan Carapetis

#### 25 346 **COMPETING INTERESTS STATEMENT**

27  
28  
29 347 Investigators for this study have no financial or other competing interests.

#### 31 348 **FUNDING STATEMENT**

32  
33  
34 349 This study is funded by the National Health and Medical Research Council of Australia (NHMRC) Clinical  
35  
36 350 Trials & Cohort Studies - grant number APP1187743.

#### 38 351 **REFERENCES**

- 40  
41  
42 352 1. Carapetis JR, Beaton A, Cunningham MW, Guilherme L, Karthikeyan G, Mayosi BM, et al. Acute  
43 353 rheumatic fever and rheumatic heart disease. *Nat Rev Dis Primers*. 2016;2:15084.  
44 354 2. Carapetis JR. Rheumatic heart disease in developing countries. *N Engl J Med*. 2007;357(5):439-41.  
45 355 3. Roth GA, Mensah GA, Johnson CO, Addolorato G, Ammirati E, Baddour LM, et al. Global Burden  
46 356 of Cardiovascular Diseases and Risk Factors, 1990-2019: Update From the GBD 2019 Study. *J Am Coll*  
47 357 *Cardiol*. 2020;76(25):2982-3021.  
48 358 4. Denny FW, Wannamaker LW, Hahn EO. Comparative effects of penicillin, aureomycin and  
49 359 terramycin on streptococcal tonsillitis and pharyngitis. *Pediatrics*. 1953;11:7-13.  
50 360 5. Stollerman GH, Rusoff JH, Hirschfeld I. Prophylaxis against Group A Streptococci in Rheumatic  
51 361 fever: the use of single monthly injections of Benzathine Penicillin G. *N Engl J Med*. 1955;252(19):787-92.  
52 362 6. Wyber R, Carapetis J. Evolution, evidence and effect of secondary prophylaxis against rheumatic  
53 363 fever. *Journal of the Practice of Cardiovascular Sciences*. 2015;1(1):9-14.

- 1  
2  
3 364 7. Ginsburg CM, McCracken GH, Jr., Zweighaft TC. Serum penicillin concentrations after  
4 365 intramuscular administration of benzathine penicillin G in children. *Pediatrics*. 1982;69(4):452-4.  
5 366 8. Wyber R, Boyd BJ, Colquhoun S, Currie BJ, Engel M, Kado J, et al. Preliminary consultation on  
6 367 preferred product characteristics of benzathine penicillin G for secondary prophylaxis of rheumatic fever.  
7 368 Drug delivery and translational research. 2016;6(5):572-8.  
8 369 9. Wood H, Feinstein A, Taranta A, Epstein J, Simpson R. Rheumatic fever in children and  
9 370 adolescents: a long term epidemiologic study of subsequent prophylaxis, streptococcal infections, and  
10 371 clinical sequelae: III. Comparative effectiveness of three prophylaxis regimes in preventing streptococcal  
11 372 infections and rheumatic recurrences. *Annals of Internal Medicine*. 1964;20(2):31-46.  
12 373 10. RHD Australia (ARF/RHD writing group). The 2020 Australian guideline for prevention, diagnosis  
13 374 and management of acute rheumatic fever and rheumatic heart disease (3.2 Edition, March 2022). 2020.  
14 375 11. Sika-Paotonu D, Laing B, Cockburn A, Gu V, Tiatia R, Sung YK, et al. The BPG reformulation  
15 376 preferences of children and young people – an interim analysis. Xavier Louisiana School of Pharmacy  
16 377 Health Disparities Conference; 8-10 April; New Orleans 2019.  
17 378 12. Craig W. Re-evaluating current antibiotic therapy. *Respir Med*. 2001;95:S12-S9.  
18 379 13. Hand RM, Salman S, Newall N, Vine J, Page-Sharp M, Bowen AC, et al. A population  
19 380 pharmacokinetic study of benzathine benzylpenicillin G administration in children and adolescents with  
20 381 rheumatic heart disease: new insights for improved secondary prophylaxis strategies. *J Antimicrob*  
21 382 *Chemother*. 2019;74(7):1984-91.  
22 383 14. Ketema EB, Gishen NZ, Hailu A, Leul A, Hadgu A, Hagos K, et al. High risk of early sub-therapeutic  
23 384 penicillin concentrations after intramuscular benzathine penicillin G injections in Ethiopian children and  
24 385 adults with rheumatic heart disease. *PLoS Negl Trop Dis*. 2021;15(6):e0009399.  
25 386 15. Osowicki J, Azzopardi KI, Fabri L, Frost HR, Rivera-Hernandez T, Neeland MR, et al. A controlled  
26 387 human infection model of *Streptococcus pyogenes* pharyngitis (CHIVAS-M75): an  
27 388 observational, dose-finding study. *The Lancet Microbe*. 2021.  
28 389 16. Chamberlain-Salaun J, Mills J, Kevat PM, Rémond MG, Maguire GP. Sharing success -  
29 390 understanding barriers and enablers to secondary prophylaxis delivery for rheumatic fever and rheumatic  
30 391 heart disease. *BMC Cardiovasc Disord*. 2016;16(1):166.  
31 392 17. Huck DM, Nalubwama H, Longenecker CT, Frank SH, Okello E, Webel AR. A qualitative examination  
32 393 of secondary prophylaxis in rheumatic heart disease: factors influencing adherence to secondary  
33 394 prophylaxis in Uganda. *Glob Heart*. 2015;10(1):63-9.e1.  
34 395 18. Osowicki J, Azzopardi K, Baker C, Waddington C, Pandey M, Schuster T, et al. Controlled human  
35 396 infection for vaccination against *Streptococcus pyogenes* (CHIVAS): Establishing a group A *Streptococcus*  
36 397 pharyngitis human infection study. *Vaccine*. 2019;37(26):3485-94.  
37 398 19. Osowicki J, Azzopardi KI, McIntyre L, Rivera-Hernandez T, Ong CY, Baker C, et al. A Controlled  
38 399 Human Infection Model of Group A *Streptococcus* Pharyngitis: Which Strain and Why? *mSphere*.  
39 400 2019;4(1).  
40 401 20. Therapeutic Guidelines Ltd. Therapeutic Guidelines - Antibiotic (eTG December 2020) 2021.  
41 402 21. Batty KT, Page-Sharp M, Salman S, Hla TK, Manning L. Stability of benzylpenicillin for continuous  
42 403 intravenous infusions: an isotonic formulation for therapeutic use and a low-dose formulation for clinical  
43 404 trial (accepted). *J Infect Chemother*.  
44 405 22. Vekemans J, Gouvea-Reis F, Kim JH, Excler JL, Smeesters PR, O'Brien KL, et al. The path to group A  
45 406 *Streptococcus* vaccines: WHO research and development technology roadmap and preferred product  
46 407 characteristics. *Clin Infect Dis*. 2019;69(5):877-83.  
47 408 23. Roestenberg M, Hoogerwerf MA, Ferreira DM, Mordmuller B, Yazdanbakhsh M. Experimental  
48 409 infection of human volunteers. *Lancet Infect Dis*. 2018;18(10):e312-e22.  
49 410 24. Sekhar A, Kang G. Human challenge trials in vaccine development. *Semin Immunol*.  
50 411 2020;50:101429.

- 1  
2  
3 412 25. Kalil JA, Halperin SA, Langley JM. Human challenge studies: a review of adequacy of reporting  
4 413 methods and results. *Future Microbiol.* 2012;7(4):481-95.
- 5 414 26. D'Alessandri R, Plotkin G, Kluge RM, Wittner MK, Fox EN, Dorfman A, et al. Protective studies with  
6 415 group A streptococcal M protein vaccine. III. Challenge of volunteers after systemic or intranasal  
7 416 immunization with Type 3 or Type 12 group A *Streptococcus*. *J Infect Dis.* 1978;138(6):712-8.
- 8 417 27. Fox EN, Waldman RH, Wittner MK, Mauzeri AA, Dorfman A. Protective study with a group A  
9 418 streptococcal M protein vaccine. Infectivity challenge of human volunteers. *J Clin Invest.* 1973;52(8):1885-  
10 419 92.
- 11 420 28. Polly SM, Waldman RH, High P, Wittner MK, Dorfman A. Protective studies with a group A  
12 421 streptococcal M protein vaccine. II. Challenge of volunteers after local immunization in the upper  
13 422 respiratory tract. *J Infect Dis.* 1975;131(3):217-24.
- 14 423 29. Waldman RH, Lee JD, Polly SM, Dorfman A, Fox EN. Group A streptococcal M protein vaccine:  
15 424 protection following immunization via the respiratory tract. *Dev Biol Stand.* 1975;28:429-34.
- 16 425 30. Montagnat OD, Webster GR, Bullita J, Landersdorfer C, Wyber R, Sheel M, et al. Lessons learned  
17 426 in the development of sustained release penicillin drug delivery systems for the prophylactic treatment of  
18 427 rheumatic heart disease (RHD). *Drug delivery and translational research.* 2018;8(3):729-39.
- 19 428 31. Bernard P, Bedane C, Mounier M, Denis F, Catanzano G, Bonnetblanc JM. Streptococcal cause of  
20 429 erysipelas and cellulitis in adults. A microbiologic study using a direct immunofluorescence technique.  
21 430 *Arch Dermatol.* 1989;125(6):779-82.
- 22 431 32. Leppard BJ, Seal DV, Colman G, Hallas G. The value of bacteriology and serology in the diagnosis  
23 432 of cellulitis and erysipelas. *Br J Dermatol.* 1985;112(5):559-67.
- 24 433 33. Cannon J, Dyer J, Carapetis J, Manning L. Epidemiology and risk factors for recurrent severe lower  
25 434 limb cellulitis: a longitudinal cohort study. *Clin Microbiol Infect.* 2018;24(10):1084-8.
- 26 435 34. Cannon J, Rajakaruna G, Dyer J, Carapetis J, Manning L. Severe lower limb cellulitis: defining the  
27 436 epidemiology and risk factors for primary episodes in a population-based case-control study. *Clin  
28 437 Microbiol Infect.* 2018;24(10):1089-94.
- 29 438 35. Raff AB, Kroshinsky D. Cellulitis: A Review. *JAMA.* 2016;316(3):325-37.
- 30 439 36. Horn DL, Zabriskie JB, Austrian R, Cleary PP, Ferretti JJ, Fischetti VA, et al. Why have group A  
31 440 streptococci remained susceptible to penicillin? Report on a symposium. *Clin Infect Dis.* 1998;26(6):1341-  
32 441 5.
- 33 442 37. Macris MH, Hartman N, Murray B, Klein RF, Roberts RB, Kaplan EL, et al. Studies of the continuing  
34 443 susceptibility of group A streptococcal strains to penicillin during eight decades. *Pediatric Infectious  
35 444 Disease Journal.* 1998;17(5):377-81.
- 36 445 38. Vannice KS, Ricaldi J, Nanduri S, Fang FC, Lynch JB, Bryson-Cahn C, et al. *Streptococcus pyogenes*  
37 446 *pbp2x* Mutation Confers Reduced Susceptibility to beta-Lactam Antibiotics. *Clinical Infectious Diseases.*  
38 447 2020;71(1):201-4.
- 39 448 39. Anderson J, Imran S, Frost HR, Azzopardi KI, Jalali S, Novakovic B, et al. Immune signature of acute  
40 449 pharyngitis in a *Streptococcus pyogenes* human challenge trial. *Nat Commun.* 2022;13(1):769.
- 41 450 40. Curry LA, Nembhard IM, Bradley EH. Qualitative and mixed methods provide unique contributions  
42 451 to outcomes research. *Circulation.* 2009;119(10):1442-52.

48  
49 45250  
51 453 **FIGURES**52  
53  
54 454 **Figure 1:** Pictorial synopsis of the CHIPS study. (Pen C<sub>ss</sub>, penicillin steady state concentration; PK,  
55 455 pharmacokinetic)

1  
2  
3 456 **Figure 2:** Participants' journey through the CHIPS study.  
4  
5

6 457 **Figure 3:** Schematic illustration of governance structure and information flow. (AE – adverse event; CRO  
7 – contract research organisation; LCMS – liquid crystallography mass spectrometry; PI – principal  
8 investigator; PICC – peripherally inserted central catheter; SAE – serious adverse event)  
9

10 460  
11  
12

13 461 **WORD COUNT - 3412**  
14  
15

16  
17  
18  
19  
20  
21  
22  
23  
24  
25  
26  
27  
28  
29  
30  
31  
32  
33  
34  
35  
36  
37  
38  
39  
40  
41  
42  
43  
44  
45  
46  
47  
48  
49  
50  
51  
52  
53  
54  
55  
56  
57  
58  
59  
60

For peer review only

# CHIP

CONTROLLED HUMAN INFECTION  
FOR PENICILLIN AGAINST  
*STREPTOCOCCUS PYOGENES*

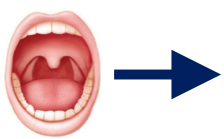

PK ANALYSIS &  
INDIVIDUALISED  
INFUSION DOSE  
ALLOCATION

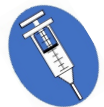

PENICILLIN  
BOLUS

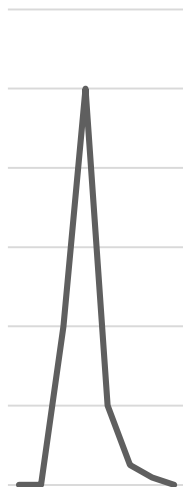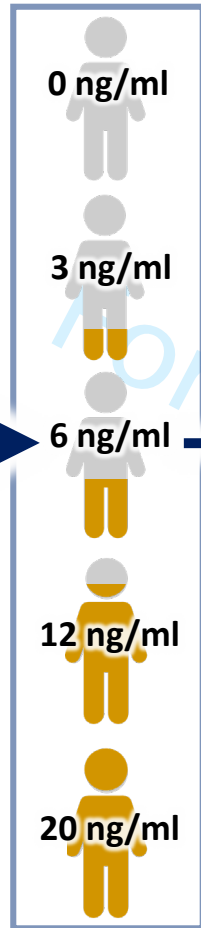

CHALLENGE

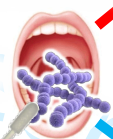

PHARYNGITIS

NO PHARYNGITIS

antibiotics

antibiotics

PENICILLIN CONTINUOUS INFUSION

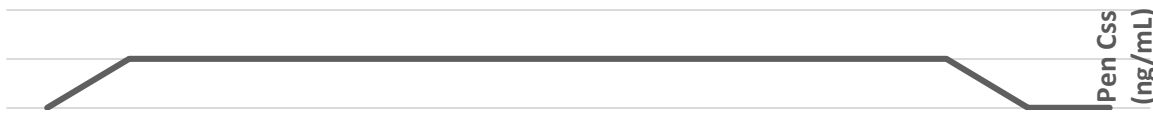

Pen C<sub>ss</sub>  
(ng/mL)

SCREENING

DOSE SELECTION AND  
RANDOMISATION

INPATIENT PERIOD

OUTPATIENT  
FOLLOW-UP

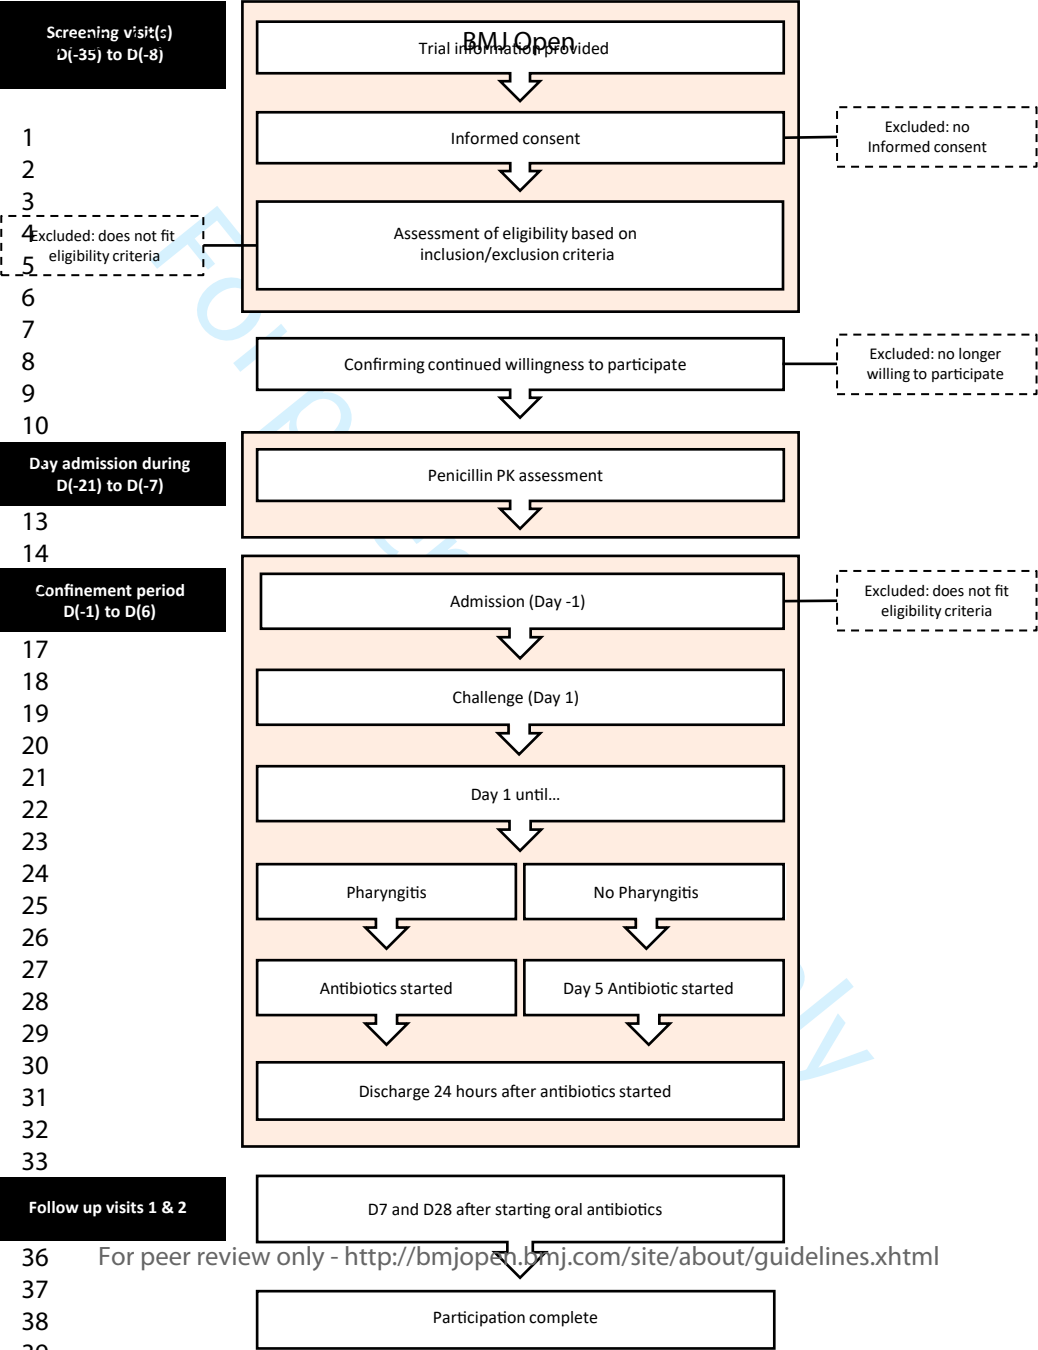



### Trial Management Group

#### Day to day delivery & conduct of the trial:

- Not independent of trial
- Remains blinded to participant allocation, efficacy and safety reports for the entire trial

#### Comprising:

- PI's delegate, PICC nurses,
- CRO Nursing/Medical Staff

Continue Trial: Yes/No

SAE/AE Reports

Primary outcome assessments

Individualised penicillin doses

Logistical issues

### Safety Data Review Team (SDRT)

#### Voting members (mandatory attendance) comprising:

- Independent medical monitor (Infectious Diseases Expert and SDRT Chair – preferably with experience in human challenge models)
- Independent *S. pyogenes* expert
- Independent trial statistician
- A/Prof Laurens Manning (PI)
  - Receives reports on SAE and AE with recommendations
  - Provides recommendation to continue trial after each cohort of 15 participants
  - Provides recommendation to modify treatment allocations with interim analyses with advice from non-voting team members

#### Non-voting members comprising:

##### Analytical Team (mandatory attendance):

Pharmacometrician, trial biostatistician, LCMS analyst

- Not-independent of trial
- Responsible for treatment allocation, individualised dosing & planned interim analyses
- Provides advice to voting members

#### Trial steering committee (invitees, as required attendance):

Listed CHIPS Investigators

- Not independent of trial
- Executive advice to voting members which considers the interests of trial, participants, funder, sponsor

**SUPPLEMENTARY MATERIALS**

Inclusion and exclusion criteria for eligibility to participate in CHIPS study

**Inclusion criteria**

1. Males or females, aged 18 - 40 years (inclusive).
2. Body mass index of 18.0 - 32.0 kg/m<sup>2</sup>, inclusive, and body weight ≥ 50.0kg
3. Medically healthy, determined by medical history, physical examination, transthoracic echocardiogram, laboratory profiles without any clinically significant abnormalities, vital signs, and 12-lead ECG at screening.
4. Systolic blood pressure (SBP) of 90 mmHg – 140 mmHg and diastolic blood pressure (DBP) of 40 mmHg - 90 mmHg.
5. Resting heart rate (HR) of 40-100 bpm
6. Females must be non-pregnant, non-lactating or postmenopausal.
7. Females of childbearing potential must agree to use a barrier method for the duration of study
8. Must be willing and able to read, understand, and sign the participant information and consent form. Willing to comply with all study requirements.
9. Willing to abstain from the use of mouthwash from the day of screening until the first outpatient visit.
10. Must be willing for insertion and have adequate sites for placement of indwelling intravenous cannulae and midline intravenous catheter.

**Exclusion criteria**

- 1  
2  
3  
4  
5  
6  
7  
8  
9  
10  
11  
12  
13  
14  
15  
16  
17  
18  
19  
20  
21  
22  
23  
24  
25  
26  
27  
28  
29  
30  
31  
32  
33  
34  
35  
36  
37  
38  
39  
40  
41  
42  
43  
44  
45  
46  
47  
48  
49  
50  
51  
52  
53  
54  
55  
56  
57  
58  
59  
60
1. Evidence of pre-existing immunity to the challenge strain, defined for this study as a high serum IgG to a peptide comprising the first fifty amino acids of the M75 protein (N-terminal hypervariable region) measured by ELISA.
2. Currently taking penicillins or use of any penicillin-based antibiotics from screening through to the final study visit. The use of probenecid, NSAIDs, or other medications which may significantly alter penicillin PK will also not be permitted within 14 days prior to study drug administration until completion of the final follow-up visit.
3. Any corticosteroid, immunomodulator or anticoagulant use in the previous 3 months, antiplatelet use in the previous 2 weeks, or anticipated use of such drugs during the study period. Any participant currently receiving or having previously received immunosuppressive therapy, including systemic steroids including adrenocorticotrophic hormone (ACTH) or inhaled steroids in dosages which are associated with hypothalamic-pituitary-adrenal axis suppression such as 1 mg/kg/day of prednisone (or its equivalent) or chronic use of inhaled high potency corticosteroids (budesonide 800 µg or fluticasone 750 µg per day). Intranasal corticosteroid use is not allowed from 14 days prior to admission, during the confinement period, and is discouraged prior to the first outpatient visit. Topical corticosteroid use is allowed.
4. Use of prescription or non-prescription drugs (except for oral contraceptive pill in healthy adult females) and herbal supplements (such as St John's Wort) within 14 days or 5 half-lives (whichever is the longer) prior to the inoculation administration.
5. History of any clinically important cardiac, endocrine, haematological, hepatic, immunologic, metabolic, urologic, pulmonary, neurologic, dermatologic, psychiatric, and renal, or other major disease.
6. History of hospitalisation for illness within the six months prior to enrolment into study, or major surgery within the 12 months prior to enrolment into study.

- 1
  - 2
  - 3
  - 4
  - 5
  - 6
  - 7
  - 8
  - 9
  - 10
  - 11
  - 12
  - 13
  - 14
  - 15
  - 16
  - 17
  - 18
  - 19
  - 20
  - 21
  - 22
  - 23
  - 24
  - 25
  - 26
  - 27
  - 28
  - 29
  - 30
  - 31
  - 32
  - 33
  - 34
  - 35
  - 36
  - 37
  - 38
  - 39
  - 40
  - 41
  - 42
  - 43
  - 44
  - 45
  - 46
  - 47
  - 48
  - 49
  - 50
  - 51
  - 52
  - 53
  - 54
  - 55
  - 56
  - 57
  - 58
  - 59
  - 60
7. History of tonsillectomy, adenoidectomy or splenectomy.
8. Known or suspected autoimmune disease or impairment/alteration of immune function resulting from:
- a. Congenital or acquired immunodeficiency (including IgA deficiency)
  - b. Receipt of immunosuppressive therapy such as anti-cancer chemotherapy or radiation therapy within the preceding 6 months.
9. History of a severe drug reaction or severe allergic reaction (eg. anaphylaxis, convulsions) or clinically significant allergic disease diagnosed by a Physician.
10. Personal or family history of severe *S. pyogenes* infection or sequelae (such as acute rheumatic fever, rheumatic heart disease, post-streptococcal glomerulonephritis) or invasive *S. pyogenes* disease (toxic shock syndrome, necrotizing fasciitis, bloodstream infection, pleural empyema, meningitis, puerperal sepsis).
11. Clinically significant disease or any condition or disease that might affect drug absorption, distribution, or excretion, e.g. gastrectomy, diarrhoea.
12. Any vaccination within the last 28 days (except for COVID-19 or seasonal influenza) or use of any antibiotic therapy during the 14 days before challenge.
13. Presence of an acute infectious disease or febrile illness (e.g., sub-lingual temperature  $\geq 37.5^{\circ}\text{C}$ ) within the five days prior to challenge with *S. pyogenes* M75.
14. Significant acute or chronic infection within 14 days prior to inoculation that the Investigator deems may compromise participant safety.
15. Any clinically significant abnormal finding on biochemistry or haematology blood tests, urine analysis, ECG or transthoracic echocardiogram at screening.
16. Laboratory tests that fail to meet the following thresholds:

- a. Haematology: Haemoglobin, haematocrit, red cell count, white cell count with differentials, platelet count, MCH, MCV, MCHC— parameters within gender-specific reference intervals from the local laboratory unless deemed not clinically significant by the investigator.
  - b. Clinical chemistry within gender-specific reference intervals from the local laboratory unless deemed not clinically significant by the investigator: urea, glucose, creatinine, sodium, potassium, chloride and bicarbonate, lactate dehydrogenase, calcium, total protein, magnesium, phosphate, albumin, cholesterol, and uric acid. For renal function, an eGFR  $>90\text{ml}/\text{min}/\text{m}^2$  will be considered normal using the CKD-EPI without albuminuria on dipstick.
  - c. Liver function tests: aspartate aminotransferase, alanine aminotransferase, alkaline phosphatase, total bilirubin, conjugated bilirubin, gamma-glutamyl transferase [ $<1.5 \times \text{ULN}$  (ALT, GGT, Total Bilirubin; local laboratory gender-specific reference ranges) will be considered not clinically significant].
  - d. Negative HIV serology, Hepatitis B Surface Ag testing and hepatitis C serology.
  - e. Females with a negative serum pregnancy test at screening and negative urine pregnancy test at Baseline and admission
17. Ex-smoker with a  $>10$  pack year smoking history or a current smoker who is unable to stop smoking for the duration of the study.
  18. History or presence of alcohol abuse (defined as regular alcohol consumption of more than 40g or 4 standard drinks per day) or drug habituation, or any prior intravenous usage of an illicit substance.
  19. A positive urine drug test at screening or admission for confinement (e.g., amphetamines, barbiturates, benzodiazepines, cannabinoids, cocaine, and opiates) unless there is an explanation acceptable to the Investigator (e.g. the participant has stated in advance that they consumed a

prescription or OTC product which contained the detected drug) and the participant has a negative urine drug screen on retest.

20. A positive alcohol breath test at screening or admission for confinement.

21. Known hypersensitivity or other contraindication to use of penicillin, azithromycin or any other beta-lactam or macrolide antibiotic(s).

22. Known hypersensitivity to soya protein.

23. Intolerance of throat swab procedure (exaggerated gag reflex).

24. Participation in a research study that involved blood sampling of more than 450 mL of blood, received or donated blood, blood products and/or plasma derivatives or any parenteral immunoglobulin preparation within 3 months of screening.

25. History of severe infections requiring hospitalisation for intravenous antibiotics (within the last 10 years). Exceptions to this would include a short course of intravenous antibiotics for appendicitis, biliary sepsis, diverticulitis and cellulitis.

26. History of cancer (except adequately treated squamous cell or basal cell carcinoma of the skin and cervical intraepithelial neoplasia).

27. Presence of implants (except for contraceptive implants) or prosthesis (e.g. artificial joints, pacemakers).

28. Receipt of another investigational product within the 30 days prior to screening involving an investigational product or other intervention that might affect risk of invasive *S. pyogenes* infection or compromise the integrity of the study (e.g. significant volumes of blood already taken in previous study).

1  
2  
3  
4  
5  
6  
7  
8  
9  
10  
11  
12  
13  
14  
15  
16  
17  
18  
19  
20  
21  
22  
23  
24  
25  
26  
27  
28  
29  
30  
31  
32  
33  
34  
35  
36  
37  
38  
39  
40  
41  
42  
43  
44  
45  
46  
47  
48  
49  
50  
51  
52  
53  
54  
55  
56  
57  
58  
59  
60

29. Any significant disease or disorder which, in the opinion of the Investigator, may either put the participants at risk because of participation in the study, or may influence the results of the study, or the participant's ability to participate in the study.

30. Any employee of the sponsor or research site personnel directly affiliated with this study or their immediate family members defined as a spouse, parent, sibling, or child whether biological or legally adopted.

For peer review only

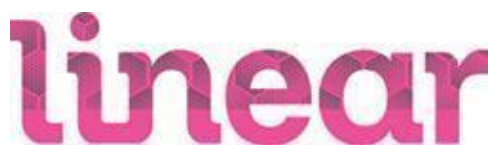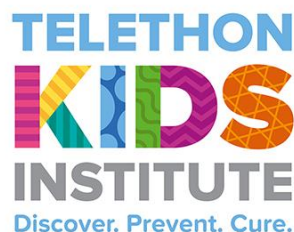

## PARTICIPANT INFORMATION SHEET & INFORMED CONSENT FORM

|                       |                                                                                                                                          |
|-----------------------|------------------------------------------------------------------------------------------------------------------------------------------|
| <b>Study Name:</b>    | Controlled human infection for penicillin against <i>Streptococcus pyogenes</i> : a double blinded, placebo controlled, randomised trial |
| <b>Protocol No:</b>   | 1111-1264-9535                                                                                                                           |
| <b>Study Sponsor:</b> | Telethon Kids Institute                                                                                                                  |
| <b>Study Doctor:</b>  | Associate Professor Laurens Manning                                                                                                      |
| <b>Study Site:</b>    | Linear Clinical Research                                                                                                                 |

You are being invited to take part in a research study. This is because you are 18 to 40 years of age and in good general health. This Participant Information Sheet and Informed Consent Form (PICF) has information to help you decide if you want to participate.

Please take your time to read this document carefully and ask the study doctor or staff any questions you may have, and to explain any words, terms, or sections that are unclear to you. You should not sign this form until you understand all of the information presented in the following pages and until all of your questions about the research have been answered to your satisfaction.

You will be asked to complete a simple multiple-choice quiz prior to signing the consent form to confirm that you understand all of the information presented to you, if you select an incorrect answer a staff member will explain which is the correct answer and why the answer you chose was incorrect, incorrect answers will not prevent you from joining the study.

Your participation in this study is entirely voluntary and you may withdraw at any time. If you decide to participate in this study, you can then choose to stop taking part in the study at any time for any reason. You are encouraged to discuss the study with your family and friends prior to signing consent. We also recommend discussing your participation with your General Practitioner (GP), should you have one, especially if you are taking any prescription medication.

Linear Clinical Research Ltd will be paid by the Sponsor, Telethon Kids Institute, for conducting this study.

### Study Synopsis

We are conducting this study to find out the minimum level of penicillin (an antibiotic) in your blood required to prevent pharyngitis (a sore throat caused by bacteria) due to infection by *Streptococcus pyogenes* (Strep A - a type of bacteria). To achieve this, we will be giving participants different doses of benzylpenicillin (a type of penicillin antibiotic) administered



1  
2  
3 intravenously (directly into a vein) and then exposing them to the Strep A bacteria to see  
4 whether or not the participant gets a sore throat. Although a sore throat is something that is  
5 normally easily recovered through treatment by antibiotics, previously untreated Strep A  
6 infections can leave patients exposed to further unwanted side effects or more severe  
7 diseases if they are re-infected (described below). When this occurs (typically in vulnerable  
8 children in areas of socioeconomic disadvantage), patients usually require deep, painful,  
9 monthly injections of penicillin for a minimum of 10 years. We would like to identify more  
10 effective treatment strategies for these patients, which involve less pain and less frequent  
11 interventions. To come up with this solution, it is crucial for us to know what level of penicillin  
12 is required to prevent re-infection. This will allow us to calculate the total amount of penicillin  
13 required and also the correct release rate to be used in alternate treatment strategies.  
14  
15  
16  
17  
18  
19  
20

### 21 **Why is this study important and what is involved?**

22  
23 *Streptococcus pyogenes* or Strep A is a bacterium that commonly causes a sore throat and  
24 skin sores in susceptible people. It is usually a mild illness cured with a course of appropriate  
25 oral antibiotics. However, when Strep A infections are not properly treated with antibiotics  
26 (i.e. in areas of socioeconomic disadvantage), the body's own response to Strep A can lead to  
27 a condition known as acute rheumatic fever (ARF). ARF is rare in industrialised settings with  
28 access to a high standard of living and sanitation. However, people living in socioeconomic  
29 disadvantage with poor access to healthcare (such as children in low- and middle-income  
30 countries or Indigenous Australians) remain vulnerable to it. ARF typically develops 2-4 weeks  
31 after Strep A infection and symptoms include joint swelling and pain, fever, uncontrolled  
32 movements, and skin rash. Untreated and over time, repeated episodes of ARF can lead to  
33 damage of the heart valves, also known as rheumatic heart disease (RHD). RHD affects an  
34 estimated 33.4 million people worldwide, resulting in the death of approximately 319,400  
35 people each year. In Northern Australia, Indigenous populations are particularly affected due  
36 to the socioeconomic disadvantages prevalent in these communities such as inadequate  
37 access to healthcare and overcrowding due to inadequate housing.  
38  
39  
40  
41  
42  
43

44 Benzylpenicillin is marketed in Australia as BENPEN™ and is a penicillin antibiotic that has  
45 been approved by the Therapeutic Goods Administration (TGA) for the treatment of other  
46 infections such as streptococcal infections, infections of the upper respiratory tract, syphilis,  
47 meningitis and some skin diseases.  
48  
49

50 BENPEN™ is an antibiotic that belongs to a group of medicines called penicillins. Another  
51 longer-acting form of penicillin (called Benzathine Penicillin G) is typically given monthly by  
52 deep, painful injection into the thigh muscles of patients who have previously been diagnosed  
53 with ARF or RHD to prevent further Strep A infection. However, many patients who need this  
54 treatment (often young children and teenagers) will fail to attend these injections because of  
55 the associated pain and frequency. If we can develop more effective and tolerable treatments  
56 (i.e. longer acting and less painful), this may increase patients' willingness to receive this vital  
57  
58  
59  
60

1  
2  
3 treatment. Therefore, we are investigating the minimum blood penicillin level that offers  
4 effective protection against Strep A re-infection by using sore throat caused by Strep A to  
5 represent the more serious conditions such as acute rheumatic fever and rheumatic heart  
6 disease.  
7  
8

9 Through this research study, we hope to find out the minimum penicillin concentration in a  
10 person's bloodstream that will prevent Strep A pharyngitis. We want to find out what effects  
11 it has on you and your health as healthy adult males and females.  
12  
13

14 The design of this study is a double-blind, randomised and placebo-controlled challenge  
15 study.  
16

17 A double-blind study means that the study doctor and the participants who take part won't  
18 know which group is getting Benzylpenicillin and which group is getting placebo. This way, the  
19 findings from the two groups will be treated equally. Neither you nor the study doctor will  
20 know which group you are in. However, this information can be obtained in case of an  
21 emergency.  
22  
23

24 To be randomised means that a computer will put participants into groups by chance. You are  
25 4 times more likely to receive study drug than placebo. If the number of participants in the  
26 total group decreases, then this could mean that your chances of receiving the active study  
27 drug are higher. Neither you nor the study doctor can choose what you receive.  
28  
29

30 This study will compare Benzylpenicillin with placebo. The placebo will be similar to the  
31 penicillin treatment, but with no active drug in it. One group of participants will take  
32 Benzylpenicillin and another group will take the placebo. The effects of the study drug will be  
33 compared to participants who are taking the placebo.  
34  
35

36 A challenge study means you will be deliberately exposed to an infectious agent to see if the  
37 dosage of study drug you receive is capable of preventing symptomatic infection. In this study  
38 you will receive a challenge of Strep A bacteria applied to your throat to evaluate whether the  
39 dosage of Benzylpenicillin that is received is effective at preventing symptomatic infection.  
40  
41

42 We will be testing a continuous infusion of the study drug in up to 60 healthy volunteers. The  
43 first 45 of the participants will be divided into 5 groups of 9 people each. The dose level  
44 received by the final 15 participants will be determined based on the results of the initial  
45 groups. The following is the way that the groups are planned to be dosed:  
46  
47  
48  
49  
50  
51  
52  
53  
54  
55  
56  
57  
58  
59  
60

| Group | Number of Participants | Dose level (ng/mL) |
|-------|------------------------|--------------------|
| A     | 9                      | 20                 |
| B     | 9                      | 12                 |
| C     | 9                      | 6                  |
| D     | 9                      | 3                  |
| E     | 9                      | 0 (placebo)        |
| F     | 15                     | TBC                |

The dose level may vary based on the safety information that is reviewed by the safety monitoring committee, but you would be informed if this was the case. You will be informed of the actual dose that you will receive, bearing in mind that you may receive placebo.

The study drug will be administered via a continuous infusion for at least 24 hours into your arm. After at least 12 hours of infusion you will be administered the Strep A challenge via oropharyngeal (to the top of your throat) swab. You will not be required to fast prior to your continuous infusion but you will be required to fast from food and water for 90 minutes prior to and following the Strep A challenge.

This study is being conducted by Linear Clinical Research Ltd. The study is being sponsored in Australia by Telethon Kids Institute.

Your GP will be notified of your participation in this study and of any clinically relevant information.

### What will I be asked to do?

If you choose to take part in this study and it is determined you are eligible and able to participate, your length of involvement would be up to approximately 61 days.

You would be required to attend a Screening Visit up to 35 days before your scheduled challenge. You will also be required to attend the clinic for the day for a baseline visit up to 21 days prior to the scheduled challenge to determine how quickly your body gets rid of the penicillin to evaluate how much you will receive on dosing day. You will check-in the day before your scheduled challenge to begin your continuous infusion of the study drug and may remain in the clinic for a maximum of 6 days and 6 nights. Your health will be evaluated prior to discharge from the clinic, you may be discharged earlier than expected if you develop pharyngitis. Follow-up visits will be performed 7 and 28 days after starting the oral antibiotics. During your stay at the clinic, all meals and refreshments will be provided for you, so please inform the staff if you have any special dietary requirements.

1  
2  
3 Additional volunteers will be recruited and admitted to the unit as alternates in order to  
4 ensure we are able to dose the required number of participants.  
5

6 Please note that if you are deemed eligible following the screening and baseline visits, this  
7 will not automatically mean you will be included in the study, with additional eligibility  
8 checks needing to occur on the day of baseline and Day -1. If you have been admitted to the  
9 unit for the baseline visit and are not required for the confinement period, you will be  
10 considered an alternate. You will be advised whether or not you will be required by the  
11 study team prior to check-in on Day -1. As well as alternates, there may be some participants  
12 who are admitted to the unit and are not required for dosing. If you are not required for  
13 dosing on Day 1 you will receive a partial payment of \$400.  
14  
15  
16  
17  
18  
19

## 20 **What will happen during the study visits?**

### 21 **Screening Visit – (Day -35 to Day -8; visit should be about 3-4 hours)**

22 This visit will occur up to 34 days before your entry into the study and will involve:  
23

- 24 ● A discussion with the study doctor to make certain you fully understand the study, its  
25 procedures and requirements. Please make sure you ask any questions you may have  
26 about the study before or during this visit. After completing a simple quiz to confirm  
27 that you understand what will occur during the study, you will need to sign the  
28 attached Informed Consent Form to confirm you are willing to participate in this study  
29 and follow all instructions provided by the study staff, as well as abide by any study  
30 restrictions (these are detailed in the 'What are my responsibilities in this study'  
31 section).  
32

33 Please note that you will have the opportunity to receive this participant information  
34 sheet and consent form prior to coming into the clinic for the screening visit. This will  
35 allow you to review the information and discuss your potential involvement in this  
36 study with family, friends and/or a medical professional of your choosing (such as your  
37 GP). After signing the consent form in the presence of the study doctor you will have  
38 the opportunity to leave the clinic and come back at a later time, to complete the  
39 screening visit assessments outlined below, should you wish to discuss your  
40 involvement further with friends, family or a medical professional of your choosing.  
41

- 42 ● Following your consent, you will undergo a complete medical examination which will  
43 include:  
44
  - 45 – Documentation of demography (race, gender, ethnicity);
  - 46 – Description of your medical and surgical history. Please ensure you inform the  
47 study doctor of any important family history and describe your personal  
48 history in full including any periods of hospitalisation, illness, surgery, blood  
49

1  
2  
3 donations and drug reactions/allergies as these may affect your capacity to  
4 safely participate in this study;

- 5  
6 – A full physical examination. Your overall health will be assessed which may  
7 include assessment of your general appearance, head, neck, ears, eyes, nose,  
8 throat, skin, cardiovascular system, respiratory system, gastrointestinal  
9 system, and neurological system; height and weight will also be measured. You  
10 will not be required to undress for this examination but may be required to  
11 move or lift parts of your clothing out of the way to allow examination of the  
12 chest, back and abdomen. For your privacy, this will be done behind a closed  
13 curtain;
- 14  
15 – Electrocardiogram (ECG; a recording of the electrical activity of the heart),  
16 which involves placement of painless sticky pads (or electrodes) onto your  
17 chest, arms and legs to assess the electrical activity of your heart. You will be  
18 required to remove or lift your clothing out of the way to allow placement of  
19 the electrodes on your chest area and this will be done behind a closed curtain  
20 for your privacy;
- 21  
22 – Vital sign measurements (blood pressure, pulse rate, breathing rate and  
23 temperature).
- 24  
25 ● You will be asked about any medications that you have taken in the last 6 months, or  
26 any other medications or products that you are currently using (including alcohol and  
27 tobacco use), as some medications must not be taken before or during the study  
28 (please refer to the 'What are my responsibilities in this study' section for medications  
29 to avoid during the study).
- 30  
31 ● You will be required to give a urine sample that will be used to perform tests to assess  
32 your general health, including screening for drugs of abuse. Please note you will not  
33 be eligible to participate in this study if you return a positive test result.
- 34  
35 ● Breathalyser samples for alcohol use will be obtained, please note you will not be  
36 allowed to participate in the study if you return a positive result.
- 37  
38 ● You will be asked how you are feeling. Please make sure you tell study staff as much  
39 information as possible.
- 40  
41 ● A sample of blood (approximately 12 mL, or 3 teaspoons) will be taken from a vein in  
42 your arm with a needle and syringe – this will be used to perform tests to assess your  
43 general health. If you are female, one of these samples may also be used to perform  
44 a pregnancy test or a follicle stimulating hormone (FSH) test to confirm post-  
45 menopausal status. Please note you will not be eligible to participate in this study if  
46 you return a positive pregnancy result.
- 47  
48 ● In order to take part in the study, you must agree to have specific serology testing for  
49 Hepatitis B, Hepatitis C and Human Immunodeficiency Virus (HIV). Approximately 5  
50 mL, or 1 teaspoon of blood, will be taken for this testing (included in the volume  
51 above). You will receive information and counselling before the test. If a positive result  
52  
53  
54  
55  
56  
57  
58  
59  
60

1  
2  
3 is found as a result of this testing, appropriate counselling services will be arranged by  
4 the study doctor to discuss treatment options. You will not be eligible to participate if  
5 you return a positive test result. Please note that as per Western Australian Law,  
6 Hepatitis B, Hepatitis C and HIV are notifiable diseases, and a positive result will be  
7 notified to the Department of Health.  
8  
9

- 10 ● An additional sample of blood (approximately 4mL, or one teaspoon) will be taken to  
11 assess for any pre-existing immunity to Strep A. You will not be eligible to participate  
12 if you return a positive test result.
- 13 ● You will be tested for bacterial infection via 3 throat swabs. To collect the swab  
14 sample, you will be asked to tilt your head back prior to the swab being inserted into  
15 your mouth towards the back of your throat. The swab will be rotated several times  
16 and then removed.
- 17 ● At the conclusion of screening, provided you are eligible and willing to participate in  
18 the study, a study staff member will contact you and explain the details of the study  
19 to you, including re-confirming the study dates and restrictions.
- 20 ● After your screening visit, you will be required to undergo an echocardiogram. An  
21 echocardiogram uses ultrasound waves to produce images of your heart. This  
22 commonly used test allows the measurement of the size of different parts of your  
23 heart and to see how your heart is beating and pumping blood. The study team will  
24 assist in booking your echocardiogram for you and provide you with directions on how  
25 to get there.
- 26 ● There may be reasons why you are not allowed to take part in this study. The study  
27 doctor or staff will discuss these with you.  
28  
29  
30  
31  
32  
33  
34  
35

### 36 **Individualised Penicillin Assessment – (Day -21 to Day -8; visit should be about 7-8 hours)**

37 This baseline visit will occur up to 20 days before your entry into the study and will involve a  
38 number of assessments to determine how quickly your body gets rid of penicillin. This will  
39 allow the study team to determine the exact dose of penicillin required on Day -1.  
40  
41

42 The following assessments will be performed at various times throughout the day:

- 43 ● Physical examination
- 44 ● Measurement of your height and weight
- 45 ● Measurement of your vital signs
- 46 ● Blood samples (up to 8 mL or approximately one and a half teaspoons each time) will  
47 be taken for tests to assess your general health.
- 48 ● Additional blood samples (up to approximately 15 mL or three teaspoon each time)  
49 will be taken for research purposes. Samples obtained for research purposes will give  
50 us better insight into how your body reacts to Strep A infection, how your body gets  
51 rid of penicillin and how Strep A reacts to penicillin.
- 52 ● Additional blood samples (up to approximately 5 mL or one teaspoon each time) will  
53 be taken to measure levels of penicillin in your blood (PK sample).  
54  
55  
56  
57  
58  
59  
60



- If you are a female a sample of urine may be collected to perform a pregnancy test (please note you will not be allowed to participate in the study if you return a positive pregnancy result)
- You will be regularly asked how you are feeling and if you had any changes in your health or taken any new medications. It is very important to tell the study staff about anything that has changed so that it can be properly recorded before you have any study medication. These changes won't necessarily keep you from continuing in the study, so please make sure you tell study staff as much information as possible.
- An indwelling cannula (a flexible, small plastic tube) will be inserted into a vein in your arm to allow for the collection of blood before the penicillin is administered and at specific intervals up to 6 hours after administration. If the cannula becomes blocked or stops working, some of the blood samples which were planned to be collected in this way may be collected with a needle and syringe.
- A second indwelling cannula will be inserted into a vein in your arm for the delivery of the penicillin. Penicillin will be administered via infusion over 2 minutes. The study doctors will use the data collected from this procedure to decide on the amount of penicillin to administer on Day -1.
- You will be provided with meals during your inpatient stay.

#### **Treatment Period (Day -1 up to Day 6)**

You will check in to the Linear study clinic the day that you will receive the continuous penicillin infusion (i.e. Day -1) and will be assessed to confirm your ongoing eligibility to participate in the study. Please note that in order to protect members of the public from infection you will be confined to a separate ward to our other participants. You will be permitted to leave this ward in emergencies and when you need to use the bathroom. The study team will explain this to you in more detail.

The following assessments will be performed at various times during your stay at the Linear study clinic:

- Physical examination
- Measurement of your vital signs
- Blood samples (up to approximately 8 mL or one and a half teaspoons each time) will be taken for tests to assess your general health.
- Additional blood samples (up to approximately 3 mL or slightly less than one teaspoon each time) will be taken for research purposes.
- Additional blood samples (up to approximately 5 mL or one teaspoons each time) will be taken to measure levels of penicillin in your blood (PK sample).
- A urine sample will be collected to test for drugs-of-abuse. If you are a female this sample may also be used to check for pregnancy (please note you will not be allowed to participate in the study if you return a positive pregnancy or drugs-of-abuse result).

- Breathalyser samples for alcohol use will be obtained at check-in, please note you will not be allowed to participate in the study if you return a positive result.
- You will be tested for bacterial infection via throat swabs. To collect the swab sample, you will be asked to tilt your head back prior to the swab being inserted into your mouth towards the back of your throat. The swab will be rotated several times and then removed.
- Saliva samples will be collected to measure penicillin levels. You will be asked to rinse your mouth with water and then fast for 60 minutes prior to placing a cotton swab in your mouth. You will then be asked to move the cotton swab around in your mouth until it is saturated.
- Nasal lining fluid will be collected via special collection device. An absorbent strip of the device will be inserted into your nostril for approximately 60 seconds.
- Photographs of the back of your throat will be taken. You will be asked to stick out your tongue and say 'ah' in order to capture the best view of your throat for the photo. If required, the investigator will use a wooden tongue depressor to gently push down on your tongue for a better view.
- You will be given a questionnaire to complete at 3 timepoints (Day -1, Day 3 and Day of Discharge) during your confinement, it is estimated that each timepoint will take up to 30 minutes to complete, you are encouraged to complete these questionnaires in your own time. You will also be given a diary to log your feelings to complete during your stay. If you have any questions about the questionnaires or diary you can contact a CHIPS study representative on (08) 6319 1456 or (08) 6319 1254 for assistance.
- On Day -1 a midline intravenous catheter will be inserted into the middle upper arm under guidance via ultrasound. A midline catheter is an 8-12cm catheter that sits in your vein for drug delivery over multiple days. You will be administered an individualized loading dose of penicillin initially for 2 minutes followed by continuous administration for a maximum of 5 days. The study team will inspect the catheter every 12 hours following insertion.
- On Day 1 after at least 12 hours of continuous penicillin administration you will be 'challenged' with Strep A bacteria. This will involve your throat being swabbed to apply the bacteria. You will be required to fast from food and water for 90 minutes prior to and after the challenge. Following challenge you will be assessed by the study doctor every 12 hours to monitor for pharyngitis, if you have a sore throat at all during the study you will be offered pain relief medication (paracetamol) to ease your symptoms.
- If you develop pharyngitis from the Strep A challenge the continuous penicillin will be stopped and you will be administered non-penicillin oral antibiotics (azithromycin). If you do not develop pharyngitis, on Day 5, the continuous penicillin will be stopped and you will be administered non-penicillin oral antibiotics. During your stay you will be able to request paracetamol at any given time to control any symptoms you may be feeling.



- You will be regularly asked how you are feeling and if you had any changes in your health or taken any new medications. It is very important to tell the study staff about anything that has changed so that it can be properly recorded before you have any study medication. These changes won't necessarily keep you from continuing in the study, so please make sure you tell study staff as much information as possible.
- You will be provided with meals during your inpatient stay. You will be required to avoid eating for at least 90 minutes prior to challenge and for 90 minutes after the challenge.
- 24 hours after starting your oral antibiotics (azithromycin), if the study doctor approves, you will be checked out of the clinic and can return home. Please make sure you let the study doctor or study staff know of any symptoms you may be feeling before leaving the clinic, so the study doctor can properly assess you before you leave.

### **Follow-up Visits (7 and 28 days post oral antibiotics) (Visit should be approx. 2 hours)**

You will need to return to the study clinic for a follow-up visit 7 and 28 days after starting your 5 day course of oral antibiotics and may undergo the following procedures:

- Physical examination
- Measurement of your vital signs
- Blood samples (up to approximately 8 mL or one and a half teaspoons each time) will be taken for tests to assess your general health.
- An ECG will be performed
- You will be required to give a urine sample that will be used to perform tests to assess your general health.
- Additional blood samples (up to approximately 3 mL or 0.5 teaspoons each time) will be taken for research purposes.
- Saliva samples will be collected. You will be asked to rinse your mouth with water and then fast for 60 minutes prior to placing a cotton swab in your mouth. You will then be asked to move the cotton swab around in your mouth until it is saturated.
- You will be asked how you are feeling and if you have had any changes in your health since dosing and whether you have taken any other medications.

|    | Screening                        | Individualized Penicillin Assessment<br>(Baseline) |   |      |     |   |   |   |   | Confinement |   |                |   |    |    |                    | Outpatient Follow Up |                    |                    |                 |                  |   |
|----|----------------------------------|----------------------------------------------------|---|------|-----|---|---|---|---|-------------|---|----------------|---|----|----|--------------------|----------------------|--------------------|--------------------|-----------------|------------------|---|
| 1  | Day                              | D(-35) to -8                                       |   |      |     |   |   |   |   | -1          | 1 |                |   |    | 2  | 3                  | 4                    | 5                  | 6                  | 7 Days post A/B | 28 Days post A/B |   |
| 2  | Hours                            |                                                    | 0 | 0.25 | 0.5 | 1 | 2 | 3 | 4 | 6           |   | 0              | 2 | 12 | 24 |                    |                      |                    |                    |                 |                  |   |
| 3  | Review eligibility               | x                                                  | x |      |     |   |   |   |   |             | x |                |   |    |    |                    |                      |                    |                    |                 |                  |   |
| 4  | Informed consent                 | x                                                  |   |      |     |   |   |   |   |             |   |                |   |    |    |                    |                      |                    |                    |                 |                  |   |
| 5  | Survey questions & Diary         |                                                    |   |      |     |   |   |   |   |             | ▼ |                |   |    |    |                    |                      |                    |                    |                 |                  |   |
| 6  | Medical history                  | x                                                  | x |      |     |   |   |   |   |             |   |                |   |    |    |                    |                      |                    |                    |                 |                  |   |
| 7  | BMI                              | x                                                  | x |      |     |   |   |   |   |             | x |                |   |    |    |                    |                      |                    |                    |                 |                  |   |
| 8  | Vital signs                      | x                                                  | x |      |     |   |   |   | x |             | x | x <sup>1</sup> |   |    |    | x <sup>1</sup>     | x <sup>1</sup>       | x <sup>1</sup>     | x <sup>1</sup>     | x <sup>1</sup>  | x                | x |
| 9  | Physical Examination             | x                                                  | x |      |     |   |   |   |   |             | x | x              |   |    |    | x                  | x                    | x                  | x                  | x               | x                | x |
| 10 | Echocardiogram                   | x                                                  |   |      |     |   |   |   |   |             |   |                |   |    |    |                    |                      |                    |                    |                 |                  |   |
| 11 | Breathalyser & Urine drug screen | x                                                  |   |      |     |   |   |   |   |             | x |                |   |    |    |                    |                      |                    |                    |                 |                  |   |
| 12 | Urinalysis                       | x                                                  |   |      |     |   |   |   |   |             |   |                |   |    |    |                    |                      |                    |                    |                 |                  | x |
| 13 | ECG                              | x                                                  |   |      |     |   |   |   |   |             |   |                |   |    |    |                    |                      |                    |                    |                 |                  | x |
| 14 | Clinical Lab tests               | x                                                  | x |      |     |   |   |   |   |             | x |                |   |    |    |                    |                      |                    |                    |                 |                  | x |
| 15 | Pregnancy test                   | x                                                  | x |      |     |   |   |   |   |             | x |                |   |    |    |                    |                      |                    |                    |                 |                  |   |
| 16 | Midline insertion                |                                                    |   |      |     |   |   |   |   |             | x |                |   |    |    |                    |                      |                    |                    |                 |                  |   |
| 17 | Penicillin Administration        |                                                    | x |      |     |   |   |   |   |             | x | x <sup>2</sup> |   |    |    |                    |                      |                    |                    |                 |                  |   |
| 18 | PK Sample                        |                                                    | x | x    | x   | x | x | x | x | x           | x | x              | x | x  | x  | x <sup>2,3</sup>   | x <sup>2,3</sup>     | x <sup>2,3</sup>   |                    |                 |                  |   |
| 19 | Research Bloods                  |                                                    | x |      |     |   |   |   |   |             | x | x              | x | x  | x  | x                  | x                    | x                  | x                  |                 | x                | x |
| 20 | Strep A challenge                |                                                    |   |      |     |   |   |   |   |             |   | x              |   |    |    |                    |                      |                    |                    |                 |                  |   |
| 21 | Throat swabs                     | x                                                  |   |      |     |   |   |   |   |             | x |                |   | x  | x  | x <sup>3,4,7</sup> | x <sup>3,4,7</sup>   | x <sup>3,4,7</sup> | x <sup>3,4,7</sup> | x               | x                | x |
| 22 | Photo of throat                  |                                                    |   |      |     |   |   |   |   |             | x |                |   |    |    | x <sup>5</sup>     |                      |                    |                    |                 |                  |   |
| 23 | Nasal lining fluid               |                                                    |   |      |     |   |   |   |   |             | x | x              | x | x  | x  |                    |                      |                    |                    |                 |                  |   |
| 24 | Saliva Sample                    |                                                    |   |      |     |   |   |   |   |             | x |                |   |    |    | x <sup>6</sup>     |                      |                    |                    | x               | x                |   |
| 25 | Oral antibiotic (A/B)            |                                                    |   |      |     |   |   |   |   |             |   |                |   |    |    | x <sup>5</sup>     |                      |                    |                    |                 | If required      |   |
| 26 | Adverse Events and Symptoms      |                                                    | ▼ |      |     |   |   |   |   |             |   |                |   |    |    |                    |                      |                    |                    | x               | x                |   |
| 27 | Current Medications              | x                                                  | ▼ |      |     |   |   |   |   |             |   |                |   |    |    |                    |                      |                    |                    | x               | x                |   |

### Study Schedule of Assessments

1: 4 Times a day | 2: Until diagnosis or Day 5 | 3: 12 hourly | 4: Until Discharge | 5: At diagnosis or Day 5 | 6: At Start of Oral A/B and at discharge | 7: At sore throat

Participant Information Sheet and Informed Consent Form

1111-1264-9535 Associate Professor Laurens Manning / Linear Clinical Research

CHIPS PICF Version 3.0, 30-Aug-2022 FINAL

Page 11 of 26

For peer review only - <http://bmjopen.bmj.com/site/about/guidelines.xhtml>

## What are my responsibilities in this study?

The following things are important during your participation in this study:

- Please inform the study doctor of any medications, including herbal, vitamin, over the counter or prescription you have taken in the month prior to the expected dosing day, as these will need to be recorded and will help to determine your eligibility for study participation.
- You will not be permitted to take any non-study penicillin-based antibiotics from screening through to the end of the study. You will also not be permitted to take probenecid or Non-Steroidal Anti-Inflammatory Drugs (NSAIDs - e.g. ibuprofen) within 14 days prior to penicillin administration. Sporadic ibuprofen use (less than 5 occasions) over the 14 days is permissible.
- You must not have been vaccinated 28 days or used any antibiotic therapy 14 days prior to your challenge, except for seasonal flu or COVID-19 vaccination. Please inform the investigator if you have received these vaccinations recently.
- You must not have had a significant infection within the 14 days prior to the challenge
- You must not smoke or use any tobacco products for the duration of the study.
- You must not use any prescription or non-prescription drugs and herbal supplements within 14 days prior to your challenge until the end of study. 2 grams of paracetamol (equivalent to 4 standard 500mg tablets or 3 sustained release 665mg tablets) per day and hormonal contraceptives are allowed, vitamins are prohibited within 7 days of your first follow up visit.
- You must not be related to anyone directly affiliated with this study.
- You must not use mouthwash from the day of screening until your first follow-up visit.
- You will not be permitted to consume any caffeine containing foods or beverages during your stay at the clinic. Decaffeinated coffee and tea may be provided to you.
- Report any changes in the way you are feeling to the study doctor or study staff at any point throughout the study.
- While you are resident within the study clinic you must maintain a good level of personal hygiene. This includes bathing daily (or when instructed by the study staff), bringing enough appropriate clean clothing with you for the duration of your stay, following staff instructions on cannula care and maintaining good hand hygiene (washing your hands after using the bathroom, before consuming your meals).

## What effects could the tests have on me?

### Blood Collection:

There is some slight discomfort involved in taking blood by indwelling cannula or with a needle and syringe. The insertion of a cannula is usually safe, but there are potential risks associated with this. There is a risk that a clot will form in the vein, which may take a number of weeks to resolve. There is a small risk of infection, although the use of sterile techniques and antiseptic solutions prior to insertion of the cannula minimises this risk. There is the possibility of bruising and discomfort around the site of an intravenous cannula, although this is generally minor and resolves within a few days. There is a very small risk that a nerve could be damaged during insertion of a cannula, however, the site of cannulation is carefully chosen to minimise this risk. Symptoms of nerve damage include tingling, shooting pain and pins and needles in the area of cannulation. Nerve damage may persist indefinitely, but usually resolves within 6-12 months. There is also the small chance that the cannula becomes dislodged from the vein, which can cause minor bleeding.

Procedures relating to blood collection can also occasionally cause light-headedness or fainting. These reactions are usually mild, of short duration and limited to a feeling of weakness, accompanied by sweating, slowing of heartbeat, and a decrease in blood pressure.

### ECG:

As a result of the patches that are put on your skin when performing the ECG, there is the possibility a rash or minor irritation of the skin may result.

### Midline Insertion:

Like insertion of a cannula for blood collection, the midline catheter insertion can cause some discomfort. This insertion is usually safe but there are some potential risks involved. Like cannula insertion there is a small risk of infection, although the use of sterile techniques and antiseptic solutions prior to insertion of the catheter minimises this risk. There is the possibility of bruising and discomfort around the insertion site but this normally resolves within days. There is a risk of inflammation of the vein (phlebitis) or swelling and redness in the tissue surrounding the catheter and there is a very small risk of the catheter moving out of place or breaking inside the vein, your midline will be inspected at least every 12 hours to ensure no complications have developed. Rarely a small or sometimes larger clot may form in the vein (thrombosis or deep vein thrombosis), if this is suspected the study doctor may refer you for additional tests or treatment.

There is a very small risk that a nerve could be damaged during insertion of a catheter, however, the site of cannulation is carefully chosen to minimise this risk. Symptoms of nerve

1  
2  
3 damage include tingling, shooting pain and pins and needles in the area of insertion. Nerve  
4 damage may persist indefinitely, but usually resolves within 6-12 months.  
5

#### 6 Throat Swabs:

7  
8 You may experience some slight discomfort during the test and may gag a little when the  
9 swab is inserted.  
10

#### 11 Strep A Challenge:

12  
13 Strep A has previously been used safely in a previous human challenge study conducted by  
14 members of this study's research team. 85% of participants in this study developed a sore  
15 throat after being exposed to Strep A and there were no serious side effects experienced by  
16 any participant over the course of the study.  
17

18  
19 You may develop symptoms such as a sore throat, fever, muscle aches or painful neck glands  
20 due to the administration of Strep A, however, the bacterial strain has been extensively tested  
21 and has previous been shown not to be associated with serious complications. This will  
22 minimise the risk of the complications, most of which are seen in untreated patients. Also,  
23 you will be given antibiotic treatment (azithromycin) as soon as the diagnosis criteria are met  
24 and therefore, your risk of developing complications relating to pharyngitis is very low. There  
25 is a very slight chance that you may experience a relapse of a sore throat following antibiotic  
26 treatment, you will be advised to contact the study doctor if you experience any further  
27 symptoms of pharyngitis and a study doctor will refer you for further treatment if confirmed.  
28  
29

30  
31 If Strep A is left untreated and your immune system is unable to defend your body properly it  
32 can result in Invasive Group A Streptococcus infection (Invasive GAS infection). This is where  
33 the Strep A bacteria invades other parts of your body (e.g. your blood or lungs) and can cause  
34 a number of side effects, these can include a high fever, low blood pressure, vomiting, rashes  
35 and infection of the lung, bone or meninges (membranes that cover your brain). In rare cases  
36 patients can also develop a skin infection resulting in blisters, fever, fatigue and pain. As  
37 described earlier there is also the risk of ARF and RHD from untreated Strep A. There is also a  
38 risk of developing kidney inflammation as a result of the infection. As you will be receiving  
39 antibiotic treatment prior to discharge the risk of developing these side effects is extremely  
40 low, none of these severe side effects were seen in the previous Strep A study challenge in  
41 humans.  
42  
43

44  
45 Sometimes people who experience a sore throat from Strep A become chronic asymptomatic  
46 carriers of Strep A, this means that you still have strep A bacteria in your throat but you show  
47 no symptoms. There is a small chance that this could happen to you following treatment. The  
48 study team will be checking for this by throat swab at each follow up visit but there is no  
49 evidence to show that being an asymptomatic carrier causes an increase in discomfort or  
50 transmission to others.  
51  
52  
53  
54  
55  
56  
57  
58  
59  
60

1  
2  
3 Strep A pharyngitis is considered a contagious illness. Due to this, precautions will be taken  
4 throughout your stay to prevent transmission to those around you. Strep A pharyngitis is not  
5 considered contagious 24 hours after antibiotic treatment, you should not be contagious on  
6 discharge.  
7  
8  
9

### 10 **What are the possible risks of the medication?**

11 Benzylpenicillin has been used since the 1950s and is approved in Australia by the Therapeutic  
12 Goods Administration (TGA) as BENPEN™ for the treatment of a number of  
13 infections. BENPEN™ and other penicillins are generally well tolerated, side effects from  
14 BENPEN™ are very uncommon with 69% of side effects due to hypersensitivity (allergic  
15 reaction).  
16  
17  
18

19 The following information provides a list of potential side effects which have been reported  
20 with the use of BENPEN™:  
21  
22

#### 23 **Common Side effects (Between 1 in 10 and 1 in 100 or 1-10% of people affected)**

- 24 ● Infusion site reaction (pain, redness, swelling)
- 25 ● Abdominal pain
- 26 ● Nausea
- 27 ● Diarrhoea and Large Intestine Inflammation
- 28 ● Allergy

#### 29 **Uncommon Side Effects (Between 1 in 100 and 1 in 1,000 or 0.1-1% of people are affected)**

- 30 ● Vomiting

#### 31 **Rare Side effects (between 1 in 1,000 and 1 in 10,000 or 0.01-0.1% of people are affected)**

- 32 ● Black Tongue
- 33 ● High/Low levels of electrolytes
- 34 ● Confusion
- 35 ● Convulsions or seizures
- 36 ● Coma Changes in blood test parameters

#### 37 **Side effects with Unknown Frequency**

- 38 ● Rash and Urticaria (hives – itchy, red skin rash)
- 39 ● Fever
- 40 ● Oedema (fluid build-up in tissue)
- 41 ● Trouble breathing
- 42 ● Hepatitis (liver inflammation) or other liver issues
- 43 ● Abnormal kidney function

44  
45  
46  
47  
48  
49  
50  
51  
52  
53  
54  
55  
56  
57  
58  
59  
60  
Other side effects which have been reported with the use of penicillin therapies such as  
BENPEN™ include anaphylaxis - a severe allergic reaction that can cause itchy rash, throat

1  
2  
3 swelling, a drop-in blood pressure and possibly death; and severe cutaneous adverse  
4 reactions (SCAR). SCAR is a rare but potentially fatal adverse drug reaction which may cause  
5 rash, fever, tissue death and damage to internal organs if left untreated. You will be closely  
6 monitored for any signs of anaphylaxis or SCAR and will not be able to participate in this study  
7 if you have a history of sensitivity to penicillin and some other allergens. The study doctor will  
8 discuss these in more detail with you.  
9

10  
11  
12 Additional information related to the use of BENPEN™ will be provided to you in the Consumer  
13 Medicines Information (CMI) sheet.  
14

15  
16 There may be additional adverse effects in humans that are not yet known. If the study doctor  
17 has any concerns regarding your health during the study, additional tests may be performed  
18 to ensure your safety. These may include physical examinations, measuring your vital signs,  
19 performing an ECG and/or collecting blood samples to check your general health.  
20

21  
22 Linear's clinical facility is fully equipped with a crash cart (an emergency care trolley) and all  
23 staff are trained to deal with medical emergencies. In addition to appropriate first aid  
24 supportive measures by clinical and medical staff at Linear, your treatment may include the  
25 administration of various drugs, which may include adrenaline, anti-histamines or  
26 hydrocortisone. The local hospital Emergency Department will also be contacted if required.  
27  
28

### 29 **Are there risks associated with becoming pregnant while participating in the study?**

30  
31 Previous human experience with penicillins during pregnancy has not shown any evidence  
32 of side effects on the foetus. Benzylpenicillin is classed as pregnancy Category A drug in  
33 Australia, meaning it has been taken by many pregnant women and women of child-bearing  
34 age without any proven increase in the frequency of malformations or other direct or  
35 indirect harmful effects on the foetus having been observed. There are, however, no  
36 adequate and well-controlled studies in pregnant women showing conclusively that harmful  
37 effects of these drugs on the foetus can be excluded.  
38  
39

40  
41 It is recommended that participants use a condom for all sexual intercourse even if they or  
42 their partner are already on hormonal contraception for the entire duration of the study  
43 until completion of the follow-up visit. You should advise your study doctor if you become  
44 pregnant or father a child while participating in the research project. In the event you do fall  
45 pregnant or father a child within this period, the Sponsor may ask that you or your partner  
46 sign a separate consent form to allow monitoring of the pregnancy and the birth and the  
47 health of your child up to 1 year of age. Your study doctor will advise on medical attention  
48 for your partner should this be necessary.  
49  
50

51  
52 It is highly recommended that you inform your partner of your participation in the study.  
53 You should advise your study doctor if you father a child while participating in the research  
54 project. Your study doctor will advise on medical attention for your partner should this be  
55 necessary.  
56  
57  
58  
59  
60



1  
2  
3 You will be told in a timely manner about significant new information that might affect your  
4 decision to stay in the study.  
5

### 6 7 **What happens to my samples that are collected?** 8

9 During the study, the estimated total blood volume to be collected will be approximately 160  
10 mL (a little more than ½ a cup). As a reference, a standard blood donation is 470 mL in any  
11 12-week period. You are advised not to donate any additional blood for 12 weeks after  
12 completing the study. As with all studies requiring blood donations, adequate rest and good  
13 eating habits are also advisable.  
14

15  
16 Your samples will be stored in either the laboratory of the Sponsor, or the laboratory of a  
17 company contracted to work with the Sponsor for a period of up to 7 years following the  
18 completion of the study. Access to study samples will be limited to laboratory personnel  
19 working for the Sponsor or who are contracted to work for the Sponsor and authorised to  
20 perform analyses. Your name will not be present on any samples and the individual  
21 performing the testing will not know your identity, solely the participant number that you are  
22 assigned will be present.  
23

24  
25 You have the right to withdraw from this study at any time, however, information and samples  
26 that already have been collected from you may continue to be used.  
27  
28

### 29 30 **Additional information you need to know** 31

#### 32 **Compensation for Injury** 33

34 If you are injured as a result of your participation in this trial you may be entitled to  
35 compensation. There are two avenues that may be available to you to seek compensation.  
36

- 37 1. Sponsors of clinical trials in Australia have agreed that the guidelines developed by  
38 their industry body, Medicines Australia, will govern the way in which compensation  
39 claims from injured participants are managed by Sponsors.  
40

41  
42 However, as guidelines, they do NOT in any way dictate the pathway you should follow  
43 to seek compensation. The Sponsor is obliged to follow these guidelines.  
44

45 These guidelines are available for your inspection on the Medicines Australia Website  
46 ([www.medicinesaustralia.com.au](http://www.medicinesaustralia.com.au)) under Policy – Clinical Trials – Indemnity &  
47 Compensation Guidelines. Alternatively, your study doctor can provide you with a  
48 hard-copy of the guidelines.  
49

- 50 2. You may be able to seek compensation through the courts.  
51

52  
53 ***It is the recommendation of the independent ethics committee responsible for the review of  
54 this trial that you seek independent legal advice before taking any steps towards  
55 compensation for injury.***  
56  
57  
58  
59  
60



### **What benefits could there be from taking part in the study?**

There will be no clear benefit to you from your participation in this research. Information learned from the study may help other people in the future.

### **Are there alternatives to participation?**

Since this study is intended only to test the effect of the study drug in healthy volunteers, your alternative to being a volunteer in this study is to choose not to participate in the study.

### **Will I receive a fixed payment per visit to cover any out of pocket expenses?**

The payment for participants who participate in and complete this study will be \$2,695.

Participant payment is for your time and inconvenience. Your travel expenses and parking costs have been factored into this payment and will not be separately reimbursed.

A member of the study team will discuss with you the timing of the payments, including any interim payments you can expect.

Any payment received may be considered taxable income. Participants are encouraged to seek independent financial advice as to how any payment may affect your personal financial situation.

If you choose to withdraw your consent or in the unlikely scenario you are no longer required to participate in the study, then the level of payment you will receive will be on a pro-rata basis (i.e., you will receive a partial payment). You should also be aware that your study payment may be reduced or forfeited if you fail to follow any of the restrictions specified in this Participant Information Sheet. You will receive partial payment if you are withdrawn from the study due to non-medical reasons. You will receive full payment if you are withdrawn from the study because of medical reasons or a medical event related to the study.

Payment may be withheld entirely in the event that you are withdrawn from the study due to unacceptable behaviour, such as causing distress or behaving aggressively towards study staff or other participants.

### **Voluntary participation / Withdrawal from the study**

Your participation in this study is purely voluntary. You may refuse to take part or withdraw from this study at any time without penalty or loss of benefits to which you are otherwise entitled. You may be withdrawn from the study if the study doctor feels it is best for you or if you do not comply with the requirements of the study. The Sponsor or the study doctor can also stop this study at any time for clinical or administrative reasons without regards to the participant consent.

If you wish to withdraw from the study while staying in the clinical trial unit, please discuss this with the study staff who will assist you in this matter and ensure you are medically fit to

1  
2  
3 leave. Before you leave the study, the study doctor will want to examine you, measure your  
4 vital signs and/or collect blood samples to check your general health.  
5

6 Any significant new findings developed during the course of the research, which may affect  
7 your willingness to continue participation in this study, will be provided to you in a timely  
8 manner and may require you to sign an updated informed consent form in order to continue  
9 participating in the study.  
10  
11

### 12 13 **Termination of the study**

14  
15 The research project may be stopped for a variety of reasons. These may include the  
16 following: unacceptable side effects, the drug being shown not to be effective, the drug being  
17 shown to work and not need further investigation, and decisions made in the commercial  
18 interest of the Sponsor.  
19  
20

### 21 22 **How will my privacy be protected?**

23 If you decide to be in this study, the study doctor and research team will use health data about  
24 you to conduct this study, as described in this consent form. This may include your name,  
25 address, phone number, medical history, photographs, date of birth, and information from  
26 your study visits. With your permission, this health data may come from your family doctor  
27 or other health care workers.  
28  
29

30  
31 Please note that Linear does not sell any medications to the public and Linear personnel  
32 would never offer to sell any products to you. All medication provided by Linear for the  
33 purpose of the trial will always be free of charge to you.  
34

35  
36 By signing this document, you agree to allow the research team to share health data about  
37 you with government agencies and ethics committees that oversee the research, the Sponsor,  
38 and those working for the Sponsor, which may include affiliates of the Sponsor located in your  
39 country or other countries. An affiliate of the Sponsor includes all companies directly or  
40 indirectly owned by Telethon Kids Institute. To make sure the study rules are followed, people  
41 who work for the Sponsor will be able to see all health data about you when they visit the  
42 study site.  
43  
44

45  
46 This clinical trial requires study monitors (people working for or on behalf of the trial Sponsor)  
47 to visit the study centre to review the clinical trial data so they can verify that study  
48 procedures have been followed and the study data have been entered correctly in the study  
49 records. This process is called 'data verification'. An important part of this data verification  
50 includes confirming in a timely manner that the parts of the clinical trial that relate to  
51 protecting patient safety and wellbeing are properly performed at the study centre. This  
52 process typically takes place during regular monitoring visits to Linear Clinical Research's  
53 facilities.  
54  
55

56  
57 The health data that is sent to the Sponsor and those working for the Sponsor will not identify  
58  
59  
60

1  
2  
3 you by name. Instead, it may include your initials, date of birth and study visit dates. You will  
4 not be identified by name in any published reports about this study or in any other scientific  
5 publication or presentation. If you think that you were harmed from being in the study, the  
6 study team may also share health data about you with the Sponsor's insurer to resolve your  
7 claim.  
8  
9

10 The Sponsor and those working for the Sponsor, which may include affiliates of the Sponsor,  
11 may use the health data sent to them:  
12

- 13 ● to see if the study drug has any side effects;
- 14 ● how much of the study drug gets into the bloodstream and how long it takes to get rid  
15 of it;
- 16 ● how much of the study drug is required to prevent infection  
17  
18  
19

20  
21 For these uses, the Sponsor may share this health data with others involved in these activities,  
22 as long as they agree to only use the health data as described here. The Sponsor and those  
23 working for the Sponsor, which may include affiliates of the Sponsor, may transfer health data  
24 about you from your country to other countries where the privacy laws are not as strict. Once  
25 the research team shares health data about you with others, it may no longer be protected  
26 by privacy laws. However, in the case of health data that identifies you, or from which your  
27 identity may be ascertained, an entity subject to Australian privacy laws that has collected  
28 your information must take reasonable steps to ensure that an overseas recipient handles the  
29 information in accordance with any relevant Australian privacy principle (unless an exemption  
30 applies). If you have any questions about this, direct them to the Principal Investigator.  
31  
32

33 Your permission to use and share health data about you will not end. You may however take  
34 away your permission to use and share any future health data about you at any time by  
35 writing to the study doctor. If you do this, you will not be able to stay in this study. No new  
36 health data that identifies you will be gathered after that date. However, health data about  
37 you that has already been gathered may still be used and given to others as described in this  
38 form.  
39  
40

41 In most cases, you have the right to request access to personal information collected from  
42 you in connection with the study and discuss any information that you believe is incorrect.  
43  
44

45 Your records relating to this study and any other information received will be kept strictly  
46 confidential. However, staff participating in your care, the Sponsor and other agencies  
47 authorised by law, may inspect the records related to the study. In the event you are admitted  
48 to hospital as a result of an adverse event resulting from this study, your treating doctor may  
49 require access to your study records. Auditors or inspectors (people who oversee the research  
50 to ensure compliance) may access your study record as well as any relevant external medical  
51 records, as authorised by law, during the study or in the future. Such access may occur at the  
52 study centre or remotely through a Linear Clinical Research secure electronic platform.  
53  
54  
55  
56  
57  
58  
59  
60

1  
2  
3 Your identity will not be revealed and your confidentiality will be protected in any reviews  
4 and reports of this study that may be published. However, results may be suppressed for  
5 commercial reasons as the Sponsor of the project retains the rights to the data.  
6  
7

8 Linear Clinical Research has a privacy policy which can be viewed at  
9 <https://www.linear.org.au/privacy-policy/clinical-trial-participants/>. It contains information  
10 about the use and disclosure of personal information relating to participants, and what Linear  
11 Clinical Research is required to do to maintain confidentiality of information.  
12  
13

### 14 15 **Independence of Linear Clinical Research**

16  
17 Linear Clinical Research is an independent institute and is not part of the North Metropolitan  
18 Health Service or its hospitals and health services, or the Government of Western Australia.  
19 The health professionals involved in the conduct of this clinical research do so in a private  
20 capacity and not as employees of Sir Charles Gairdner Hospital or the State.  
21  
22

### 23 24 **Will information about this trial be included in a Registry Databank?**

25  
26 A description of this clinical trial will be available on <http://www.anzctr.org.au> as required by  
27 the Declaration of Helsinki and the Australian National Statement on Ethical Conduct in  
28 Human Research. This website will not include information that can identify you. At most, the  
29 website will include a summary of the results. You can search this website at any time.  
30  
31

### 32 33 **Who do I call if I have questions about...**

- 34  
35 ● **The study or I need to report a medical condition (e.g. injury or illness):** Speak to a  
36 study team member at Linear Clinical Research Ltd. at (08) 6382 5100.
- 37  
38 ● **I need to speak to a doctor urgently:** Doctors at Linear Clinical Research can be  
39 contacted 24 hours a day, for urgent advice or emergencies, on (08) 6382 5116.

40  
41 If you experience a medical emergency, you should seek medical assistance by  
42 contacting 000 or attending your nearest hospital Emergency Department.  
43  
44

- 45  
46 ● **Your rights as a participant in the study:** The Bellberry Human Research Ethics  
47 Committee has reviewed this study in accordance with the National Statement on  
48 Ethical Conduct in Human Research (2007) incorporating all updates. This Statement  
49 has been developed to protect the interests of people who agree to participate in  
50 human research studies. Should you wish to discuss the study or view a copy of their  
51 Complaint procedure with someone not directly involved, particularly in relation to  
52 matters concerning policies, information or complaints about the conduct of the study  
53 or your rights as a participant, you may contact the Operations Manager, Bellberry  
54 Limited on 08 8361 3222.  
55  
56  
57  
58  
59  
60

## Informed Consent Quiz

This quiz is designed to review your understanding of the study so that we can be confident that you fully understand what is involved by your agreement to participate. Please make sure you have read the information booklet in full and asked the study team any questions you have. If you don't answer all the questions correctly, don't worry. We will discuss these questions with you to ensure that you fully understand the study before signing consent.

Participant Name: \_\_\_\_\_

Date \_\_\_ / \_\_\_ / \_\_\_

**Please clearly circle one answer for each question;**

**1. The study involves volunteers being given bacteria:**

- A. In a drink
- B. Using a throat swab
- C. In a tablet
- D. By injection

**2. If you participate in this study, you are likely to get which of the following:**

- A. Acute Rheumatic Fever
- B. Malaria
- C. Rheumatic Heart Disease
- D. 'Strep throat' (also known as pharyngitis)
- E. All of the above

**3. Screening for this study includes which of the following?**

- A. Urine and blood tests (including an HIV test)
- B. Physical examination
- C. Heart ultrasound (also known as an echocardiogram)
- D. The researchers contacting your GP (should you have one)
- E. All of the above

**4. Participation in the study involves:**

- A. Staying overnight in a research ward for up to 6 nights
- B. Having intravenous lines ('drips') put into your arms
- C. Getting a constant infusion (either medicine or a salty water placebo) through the drip
- D. Not consuming beverages containing caffeine (decaf will be allowed) for the duration of stay at the research facility
- E. All of the above

- 1  
2  
3  
4  
5  
6  
7  
8  
9  
10  
11  
12  
13  
14  
15  
16  
17  
18  
19  
20  
21  
22  
23  
24  
25  
26  
27  
28  
29  
30  
31  
32  
33  
34  
35  
36  
37  
38  
39  
40  
41  
42  
43  
44  
45  
46  
47  
48  
49  
50  
51  
52  
53  
54  
55  
56  
57  
58  
59  
60
- 5. During this study, we will collect what kind of samples from you?:**
- A. Blood, sweat, tears, urine
  - B. Blood, stools, urine, saliva, nasal lining fluid
  - C. Nasal lining fluid, saliva, blood, throat swabs
  - D. Blood, throat swabs, skin biopsies
- 6. Which of the following statements is FALSE?:**
- A. I can withdraw from the study at any time without penalty or any effect on medical care I will receive in the future.
  - B. If I withdraw from the study after I have been given the Strep A bacteria, I will get a course of antibiotics to take regardless of whether I develop a throat infection or not.
  - C. Once I give consent to participate in the study, I must complete the confinement period and I cannot withdraw my consent unless there is an emergency or permission from the investigators.
  - D. I am able to withdraw from the study at any time but I understand the investigators will try to contact me after I leave to check on how I am doing.
- 7. What strep throat symptoms might you experience during this challenge study?**
- A. Sore throat
  - B. Fever
  - C. Muscles aches
  - D. Painful neck glands
  - E. All of the above
- 8. If I develop a sore throat during the study and experience pain or discomfort:**
- A. I will have to do my best to put up with it in the interest of medical science and helping others
  - B. I will be reviewed by a medical doctor and will be offered pain relief medications to help ease my symptoms
  - C. I will be given medicine to gargle and soothe my throat
  - D. I will be given pain relief only if it is deemed severe
- 9. Which of the following statements is TRUE?**
- A. I am putting myself at significant risk of developing acute rheumatic fever or rheumatic heart disease by taking part in this study.
  - B. The bacteria used in the study has not been tested in humans before.
  - C. I am not putting myself at significant risk of developing acute rheumatic fever or rheumatic heart disease because I am healthy and will receive antibiotics to treat my sore throat as soon as infection becomes apparent or before I am discharged.
  - D. This research is being done because the investigators are not sure if penicillin works for prevention of acute rheumatic fever in people who are at risk.

Score: \_\_\_ / 9

1  
2  
3 Where applicable, the Investigator/Senior Researcher confirms that:

- 4
- 5 • There has been an opportunity to discuss and clarify any incorrect responses  
6 elicited during this pre-consent quiz
  - 7 • The participant has, after discussion, demonstrated adequate understanding of  
8 what is involved in the CHIPS study and the Investigator/Senior Researcher is  
9 satisfied that they are able to provide informed consent.
- 10  
11  
12

13 Investigator/Senior Researcher signature \_\_\_\_\_

14  
15 Date \_\_\_ / \_\_\_ / \_\_\_

16  
17  
18  
19  
20  
21  
22  
23  
24  
25  
26  
27  
28  
29  
30  
31  
32  
33  
34  
35  
36  
37  
38  
39  
40  
41  
42  
43  
44  
45  
46  
47  
48  
49  
50  
51  
52  
53  
54  
55  
56  
57  
58  
59  
60

For peer review only



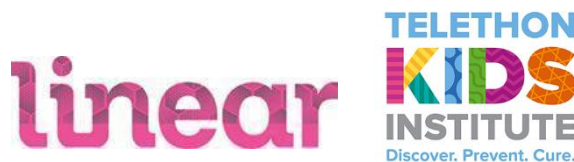

## PARTICIPANT INFORMED CONSENT FORM

Sponsor Protocol Number: 1111-1264-9535

|                      |                                                                                                                                          |
|----------------------|------------------------------------------------------------------------------------------------------------------------------------------|
| <b>Study Name:</b>   | Controlled human infection for penicillin against <i>Streptococcus pyogenes</i> : a double blinded, placebo controlled, randomised trial |
| <b>Study Doctor:</b> | Associate Professor Laurens Manning                                                                                                      |

- I have read and understood this Participant Information Sheet and Informed Consent Form.
- I am between 18 to 40 years of age (inclusive) and have been given enough time to consider my participation and asked for advice if necessary.
- I have been given the opportunity to have a member of my family or another person present while the study is explained to me.
- I have had the opportunity to ask questions and have received satisfactory answers.
- I understand that all information will be kept confidential and that the results will be used for scientific objectives.
- I authorise my research and medical records as they pertain to this study to be reviewed by the Sponsor, authorised representatives and other regulatory agencies as described in this consent form.
- I understand that my participation in this study is voluntary and that I am completely free to withdraw my consent or refuse to participate at any time without changing in any way the quality of care that I receive. If I decide to withdraw from the study, I agree that the information collected about me up to the point when I withdraw may continue to be processed.
- I understand that if I agree to leave the study for any reason, the study doctor may ask me to do some end-of-study tests.
- The nature and purpose of the research project and potential risks and discomforts associated with it have been explained to me. I understand them and agree to take part.
- I consent to my GP and /or treating specialist being notified of my participation in this study and of any clinically relevant information noted by the study doctor in the conduct of the study, and to be contacted to obtain information regarding my medical history during the study and in the future for the purposes outlined in this information sheet.
- I confirm that I will provide, to the best of my knowledge, a full and accurate medical and surgical history and details of any current medical conditions and medicines I am taking.
- I agree to additional tests being conducted during the study, as requested by a study doctor, if the doctor has any concerns in relation to my health whilst on the study.
- I acknowledge that Linear Clinical Research is an independent institute and is not part of the North Metropolitan Health Service or its hospitals and health services, or the Government of Western Australia. The health professionals involved in the conduct of this clinical research do so in a private capacity and not as employees of Sir Charles Gairdner Hospital or the State.
- I have been given a copy of the Participant Information Sheet. I am aware that I will receive a copy of this fully signed and dated Informed Consent Form.
- As a healthy volunteer, I freely consent to participate in this study.

|                                      |  |              |             |               |         |
|--------------------------------------|--|--------------|-------------|---------------|---------|
| <b>Participant's Name (printed):</b> |  |              |             |               |         |
| <b>Signature:</b>                    |  | <b>Date:</b> | ___/___/___ | <b>Time*:</b> | ___:___ |



Please document any questions that the participant raised below and how they were answered.

**Declaration by Investigator/Senior Researcher:** I have given a verbal explanation of the study, its procedures and risks, have addressed any questions asked by the participant, and I believe that the participant has understood my explanations.

|                                                         |  |               |             |
|---------------------------------------------------------|--|---------------|-------------|
| <b>Investigator/Senior Researcher's Name (printed):</b> |  |               |             |
| <b>Signature:</b>                                       |  | <b>Date:</b>  | ___/___/___ |
|                                                         |  | <b>Time*:</b> | __ : __     |

*\* Participant must sign the consent form first, prior to the Investigator/Senior Researcher.*  
*Note: All parties signing the Consent Form must date their own signature.*

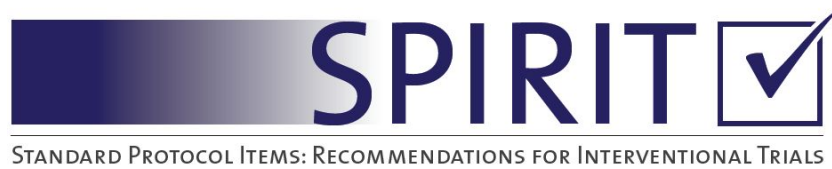

STANDARD PROTOCOL ITEMS: RECOMMENDATIONS FOR INTERVENTIONAL TRIALS

SPIRIT 2013 Checklist: Recommended items to address in a clinical trial protocol and related documents\*

| Section/item                      | Item No | Description                                                                                                                                                                                                                                                                              | Page no.  |
|-----------------------------------|---------|------------------------------------------------------------------------------------------------------------------------------------------------------------------------------------------------------------------------------------------------------------------------------------------|-----------|
| <b>Administrative information</b> |         |                                                                                                                                                                                                                                                                                          |           |
| Title                             | 1       | Descriptive title identifying the study design, population, interventions, and, if applicable, trial acronym                                                                                                                                                                             | 1         |
| Trial registration                | 2a      | Trial identifier and registry name. If not yet registered, name of intended registry                                                                                                                                                                                                     | 16        |
|                                   | 2b      | All items from the World Health Organization Trial Registration Data Set                                                                                                                                                                                                                 | 16        |
| Protocol version                  | 3       | Date and version identifier<br>- <i>Not included in manuscript but text prepared based on HREC approved CHIPS trial protocol V1.0 Dated 16 April 2021</i>                                                                                                                                |           |
| Funding                           | 4       | Sources and types of financial, material, and other support                                                                                                                                                                                                                              | 18        |
| Roles and responsibilities        | 5a      | Names, affiliations, and roles of protocol contributors                                                                                                                                                                                                                                  | 1, 18     |
|                                   | 5b      | Name and contact information for the trial sponsor                                                                                                                                                                                                                                       | 16        |
|                                   | 5c      | Role of study sponsor and funders, if any, in study design; collection, management, analysis, and interpretation of data; writing of the report; and the decision to submit the report for publication, including whether they will have ultimate authority over any of these activities | 18        |
|                                   | 5d      | Composition, roles, and responsibilities of the coordinating centre, steering committee, endpoint adjudication committee, data management team, and other individuals or groups overseeing the trial, if applicable (see Item 21a for data monitoring committee)                         | 14, Fig 3 |

|    |                                                           |     |                                                                                                                                                                                                                                                                                                                                                                                |
|----|-----------------------------------------------------------|-----|--------------------------------------------------------------------------------------------------------------------------------------------------------------------------------------------------------------------------------------------------------------------------------------------------------------------------------------------------------------------------------|
| 1  |                                                           |     |                                                                                                                                                                                                                                                                                                                                                                                |
| 2  |                                                           |     |                                                                                                                                                                                                                                                                                                                                                                                |
| 3  |                                                           |     |                                                                                                                                                                                                                                                                                                                                                                                |
| 4  | <b>Introduction</b>                                       |     |                                                                                                                                                                                                                                                                                                                                                                                |
| 5  | Background and rationale                                  | 6a  | Description of research question and justification for undertaking the trial, including summary of relevant studies (published and unpublished) examining benefits and harms for each intervention                                                                                                                                                                             |
| 6  |                                                           |     |                                                                                                                                                                                                                                                                                                                                                                                |
| 7  |                                                           |     |                                                                                                                                                                                                                                                                                                                                                                                |
| 8  |                                                           |     |                                                                                                                                                                                                                                                                                                                                                                                |
| 9  |                                                           |     |                                                                                                                                                                                                                                                                                                                                                                                |
| 10 |                                                           | 6b  | Explanation for choice of comparators                                                                                                                                                                                                                                                                                                                                          |
| 11 | Objectives                                                | 7   | Specific objectives or hypotheses                                                                                                                                                                                                                                                                                                                                              |
| 12 |                                                           |     |                                                                                                                                                                                                                                                                                                                                                                                |
| 13 | Trial design                                              | 8   | Description of trial design including type of trial (eg, parallel group, crossover, factorial, single group), allocation ratio, and framework (eg, superiority, equivalence, noninferiority, exploratory)                                                                                                                                                                      |
| 14 |                                                           |     |                                                                                                                                                                                                                                                                                                                                                                                |
| 15 |                                                           |     |                                                                                                                                                                                                                                                                                                                                                                                |
| 16 |                                                           |     |                                                                                                                                                                                                                                                                                                                                                                                |
| 17 |                                                           |     |                                                                                                                                                                                                                                                                                                                                                                                |
| 18 |                                                           |     |                                                                                                                                                                                                                                                                                                                                                                                |
| 19 |                                                           |     |                                                                                                                                                                                                                                                                                                                                                                                |
| 20 | <b>Methods: Participants, interventions, and outcomes</b> |     |                                                                                                                                                                                                                                                                                                                                                                                |
| 21 | Study setting                                             | 9   | Description of study settings (eg, community clinic, academic hospital) and list of countries where data will be collected. Reference to where list of study sites can be obtained                                                                                                                                                                                             |
| 22 |                                                           |     |                                                                                                                                                                                                                                                                                                                                                                                |
| 23 |                                                           |     |                                                                                                                                                                                                                                                                                                                                                                                |
| 24 |                                                           |     |                                                                                                                                                                                                                                                                                                                                                                                |
| 25 |                                                           |     |                                                                                                                                                                                                                                                                                                                                                                                |
| 26 |                                                           |     |                                                                                                                                                                                                                                                                                                                                                                                |
| 27 | Eligibility criteria                                      | 10  | Inclusion and exclusion criteria for participants. If applicable, eligibility criteria for study centres and individuals who will perform the interventions (eg, surgeons, psychotherapists)                                                                                                                                                                                   |
| 28 |                                                           |     |                                                                                                                                                                                                                                                                                                                                                                                |
| 29 |                                                           |     |                                                                                                                                                                                                                                                                                                                                                                                |
| 30 |                                                           |     |                                                                                                                                                                                                                                                                                                                                                                                |
| 31 |                                                           |     |                                                                                                                                                                                                                                                                                                                                                                                |
| 32 |                                                           |     |                                                                                                                                                                                                                                                                                                                                                                                |
| 33 | Interventions                                             | 11a | Interventions for each group with sufficient detail to allow replication, including how and when they will be administered                                                                                                                                                                                                                                                     |
| 34 |                                                           |     |                                                                                                                                                                                                                                                                                                                                                                                |
| 35 |                                                           |     |                                                                                                                                                                                                                                                                                                                                                                                |
| 36 |                                                           |     |                                                                                                                                                                                                                                                                                                                                                                                |
| 37 |                                                           |     |                                                                                                                                                                                                                                                                                                                                                                                |
| 38 |                                                           | 11b | Criteria for discontinuing or modifying allocated interventions for a given trial participant (eg, drug dose change in response to harms, participant request, or improving/worsening disease)                                                                                                                                                                                 |
| 39 |                                                           |     |                                                                                                                                                                                                                                                                                                                                                                                |
| 40 |                                                           |     |                                                                                                                                                                                                                                                                                                                                                                                |
| 41 |                                                           |     |                                                                                                                                                                                                                                                                                                                                                                                |
| 42 |                                                           |     |                                                                                                                                                                                                                                                                                                                                                                                |
| 43 |                                                           | 11c | Strategies to improve adherence to intervention protocols, and any procedures for monitoring adherence (eg, drug tablet return, laboratory tests)                                                                                                                                                                                                                              |
| 44 |                                                           |     |                                                                                                                                                                                                                                                                                                                                                                                |
| 45 |                                                           |     |                                                                                                                                                                                                                                                                                                                                                                                |
| 46 |                                                           |     |                                                                                                                                                                                                                                                                                                                                                                                |
| 47 |                                                           |     |                                                                                                                                                                                                                                                                                                                                                                                |
| 48 |                                                           | 11d | Relevant concomitant care and interventions that are permitted or prohibited during the trial                                                                                                                                                                                                                                                                                  |
| 49 |                                                           |     |                                                                                                                                                                                                                                                                                                                                                                                |
| 50 |                                                           |     |                                                                                                                                                                                                                                                                                                                                                                                |
| 51 | Outcomes                                                  | 12  | Primary, secondary, and other outcomes, including the specific measurement variable (eg, systolic blood pressure), analysis metric (eg, change from baseline, final value, time to event), method of aggregation (eg, median, proportion), and time point for each outcome. Explanation of the clinical relevance of chosen efficacy and harm outcomes is strongly recommended |
| 52 |                                                           |     |                                                                                                                                                                                                                                                                                                                                                                                |
| 53 |                                                           |     |                                                                                                                                                                                                                                                                                                                                                                                |
| 54 |                                                           |     |                                                                                                                                                                                                                                                                                                                                                                                |
| 55 |                                                           |     |                                                                                                                                                                                                                                                                                                                                                                                |
| 56 |                                                           |     |                                                                                                                                                                                                                                                                                                                                                                                |
| 57 |                                                           |     |                                                                                                                                                                                                                                                                                                                                                                                |
| 58 |                                                           |     |                                                                                                                                                                                                                                                                                                                                                                                |
| 59 |                                                           |     |                                                                                                                                                                                                                                                                                                                                                                                |
| 60 |                                                           |     |                                                                                                                                                                                                                                                                                                                                                                                |

|    |                                                                     |     |                                                          |       |
|----|---------------------------------------------------------------------|-----|----------------------------------------------------------|-------|
| 1  |                                                                     |     |                                                          |       |
| 2  | Participant                                                         | 13  | Time schedule of enrolment, interventions (including     | Fig 2 |
| 3  | timeline                                                            |     | any run-ins and washouts), assessments, and visits       |       |
| 4  |                                                                     |     | for participants. A schematic diagram is highly          |       |
| 5  |                                                                     |     | recommended (see Figure)                                 |       |
| 6  |                                                                     |     |                                                          |       |
| 7  | Sample size                                                         | 14  | Estimated number of participants needed to achieve       | 15    |
| 8  |                                                                     |     | study objectives and how it was determined,              |       |
| 9  |                                                                     |     | including clinical and statistical assumptions           |       |
| 10 |                                                                     |     | supporting any sample size calculations                  |       |
| 11 |                                                                     |     |                                                          |       |
| 12 |                                                                     |     |                                                          |       |
| 13 | Recruitment                                                         | 15  | Strategies for achieving adequate participant            | 10    |
| 14 |                                                                     |     | enrolment to reach target sample size                    |       |
| 15 |                                                                     |     |                                                          |       |
| 16 | <b>Methods: Assignment of interventions (for controlled trials)</b> |     |                                                          |       |
| 17 | <b>Allocation:</b>                                                  |     |                                                          |       |
| 18 |                                                                     |     |                                                          |       |
| 19 |                                                                     |     |                                                          |       |
| 20 | Sequence                                                            | 16a | Method of generating the allocation sequence (eg,        | 11    |
| 21 | generation                                                          |     | computer-generated random numbers), and list of          |       |
| 22 |                                                                     |     | any factors for stratification. To reduce predictability |       |
| 23 |                                                                     |     | of a random sequence, details of any planned             |       |
| 24 |                                                                     |     | restriction (eg, blocking) should be provided in a       |       |
| 25 |                                                                     |     | separate document that is unavailable to those who       |       |
| 26 |                                                                     |     | enrol participants or assign interventions               |       |
| 27 |                                                                     |     |                                                          |       |
| 28 |                                                                     |     |                                                          |       |
| 29 |                                                                     |     |                                                          |       |
| 30 | Allocation                                                          | 16b | Mechanism of implementing the allocation sequence        | 11    |
| 31 | concealment                                                         |     | (eg, central telephone; sequentially numbered,           |       |
| 32 | mechanism                                                           |     | opaque, sealed envelopes), describing any steps to       |       |
| 33 |                                                                     |     | conceal the sequence until interventions are             |       |
| 34 |                                                                     |     | assigned                                                 |       |
| 35 |                                                                     |     |                                                          |       |
| 36 |                                                                     |     |                                                          |       |
| 37 | Implementatio                                                       | 16c | Who will generate the allocation sequence, who will      | 11    |
| 38 | n                                                                   |     | enrol participants, and who will assign participants to  |       |
| 39 |                                                                     |     | interventions                                            |       |
| 40 |                                                                     |     |                                                          |       |
| 41 | Blinding                                                            | 17a | Who will be blinded after assignment to interventions    | 11    |
| 42 | (masking)                                                           |     | (eg, trial participants, care providers, outcome         |       |
| 43 |                                                                     |     | assessors, data analysts), and how                       |       |
| 44 |                                                                     |     |                                                          |       |
| 45 |                                                                     |     |                                                          |       |
| 46 |                                                                     | 17b | If blinded, circumstances under which unblinding is      | 11    |
| 47 |                                                                     |     | permissible, and procedure for revealing a               |       |
| 48 |                                                                     |     | participant's allocated intervention during the trial    |       |
| 49 |                                                                     |     |                                                          |       |

**Methods: Data collection, management, and analysis**

|    |                            |     |                                                                                                                                                                                                                                                                                                                                                                                                              |           |
|----|----------------------------|-----|--------------------------------------------------------------------------------------------------------------------------------------------------------------------------------------------------------------------------------------------------------------------------------------------------------------------------------------------------------------------------------------------------------------|-----------|
| 1  |                            |     |                                                                                                                                                                                                                                                                                                                                                                                                              |           |
| 2  | Data collection methods    | 18a | Plans for assessment and collection of outcome, baseline, and other trial data, including any related processes to promote data quality (eg, duplicate measurements, training of assessors) and a description of study instruments (eg, questionnaires, laboratory tests) along with their reliability and validity, if known. Reference to where data collection forms can be found, if not in the protocol |           |
| 3  |                            |     |                                                                                                                                                                                                                                                                                                                                                                                                              |           |
| 4  |                            |     |                                                                                                                                                                                                                                                                                                                                                                                                              |           |
| 5  |                            | 18b | Plans to promote participant retention and complete follow-up, including list of any outcome data to be collected for participants who discontinue or deviate from intervention protocols                                                                                                                                                                                                                    | 12        |
| 6  |                            |     |                                                                                                                                                                                                                                                                                                                                                                                                              |           |
| 7  | Data management            | 19  | Plans for data entry, coding, security, and storage, including any related processes to promote data quality (eg, double data entry; range checks for data values). Reference to where details of data management procedures can be found, if not in the protocol                                                                                                                                            | 16        |
| 8  |                            |     |                                                                                                                                                                                                                                                                                                                                                                                                              |           |
| 9  |                            |     |                                                                                                                                                                                                                                                                                                                                                                                                              |           |
| 10 | Statistical methods        | 20a | Statistical methods for analysing primary and secondary outcomes. Reference to where other details of the statistical analysis plan can be found, if not in the protocol                                                                                                                                                                                                                                     | 16        |
| 11 |                            |     |                                                                                                                                                                                                                                                                                                                                                                                                              |           |
| 12 |                            |     |                                                                                                                                                                                                                                                                                                                                                                                                              |           |
| 13 |                            | 20b | Methods for any additional analyses (eg, subgroup and adjusted analyses)                                                                                                                                                                                                                                                                                                                                     | 16        |
| 14 |                            |     |                                                                                                                                                                                                                                                                                                                                                                                                              |           |
| 15 |                            | 20c | Definition of analysis population relating to protocol non-adherence (eg, as randomised analysis), and any statistical methods to handle missing data (eg, multiple imputation)                                                                                                                                                                                                                              | 16        |
| 16 |                            |     |                                                                                                                                                                                                                                                                                                                                                                                                              |           |
| 17 |                            |     |                                                                                                                                                                                                                                                                                                                                                                                                              |           |
| 18 | <b>Methods: Monitoring</b> |     |                                                                                                                                                                                                                                                                                                                                                                                                              |           |
| 19 | Data monitoring            | 21a | Composition of data monitoring committee (DMC); summary of its role and reporting structure; statement of whether it is independent from the sponsor and competing interests; and reference to where further details about its charter can be found, if not in the protocol. Alternatively, an explanation of why a DMC is not needed                                                                        | 14, Fig 3 |
| 20 |                            |     |                                                                                                                                                                                                                                                                                                                                                                                                              |           |
| 21 |                            | 21b | Description of any interim analyses and stopping guidelines, including who will have access to these interim results and make the final decision to terminate the trial                                                                                                                                                                                                                                      | 14, Fig 3 |
| 22 |                            |     |                                                                                                                                                                                                                                                                                                                                                                                                              |           |
| 23 |                            |     |                                                                                                                                                                                                                                                                                                                                                                                                              |           |
| 24 |                            |     |                                                                                                                                                                                                                                                                                                                                                                                                              |           |
| 25 |                            |     |                                                                                                                                                                                                                                                                                                                                                                                                              |           |
| 26 |                            |     |                                                                                                                                                                                                                                                                                                                                                                                                              |           |
| 27 |                            |     |                                                                                                                                                                                                                                                                                                                                                                                                              |           |
| 28 |                            |     |                                                                                                                                                                                                                                                                                                                                                                                                              |           |
| 29 |                            |     |                                                                                                                                                                                                                                                                                                                                                                                                              |           |
| 30 |                            |     |                                                                                                                                                                                                                                                                                                                                                                                                              |           |
| 31 |                            |     |                                                                                                                                                                                                                                                                                                                                                                                                              |           |
| 32 |                            |     |                                                                                                                                                                                                                                                                                                                                                                                                              |           |
| 33 |                            |     |                                                                                                                                                                                                                                                                                                                                                                                                              |           |
| 34 |                            |     |                                                                                                                                                                                                                                                                                                                                                                                                              |           |
| 35 |                            |     |                                                                                                                                                                                                                                                                                                                                                                                                              |           |
| 36 |                            |     |                                                                                                                                                                                                                                                                                                                                                                                                              |           |
| 37 |                            |     |                                                                                                                                                                                                                                                                                                                                                                                                              |           |
| 38 |                            |     |                                                                                                                                                                                                                                                                                                                                                                                                              |           |
| 39 |                            |     |                                                                                                                                                                                                                                                                                                                                                                                                              |           |
| 40 |                            |     |                                                                                                                                                                                                                                                                                                                                                                                                              |           |
| 41 |                            |     |                                                                                                                                                                                                                                                                                                                                                                                                              |           |
| 42 |                            |     |                                                                                                                                                                                                                                                                                                                                                                                                              |           |
| 43 |                            |     |                                                                                                                                                                                                                                                                                                                                                                                                              |           |
| 44 |                            |     |                                                                                                                                                                                                                                                                                                                                                                                                              |           |
| 45 |                            |     |                                                                                                                                                                                                                                                                                                                                                                                                              |           |
| 46 |                            |     |                                                                                                                                                                                                                                                                                                                                                                                                              |           |
| 47 |                            |     |                                                                                                                                                                                                                                                                                                                                                                                                              |           |
| 48 |                            |     |                                                                                                                                                                                                                                                                                                                                                                                                              |           |
| 49 |                            |     |                                                                                                                                                                                                                                                                                                                                                                                                              |           |
| 50 |                            |     |                                                                                                                                                                                                                                                                                                                                                                                                              |           |
| 51 |                            |     |                                                                                                                                                                                                                                                                                                                                                                                                              |           |
| 52 |                            |     |                                                                                                                                                                                                                                                                                                                                                                                                              |           |
| 53 |                            |     |                                                                                                                                                                                                                                                                                                                                                                                                              |           |
| 54 |                            |     |                                                                                                                                                                                                                                                                                                                                                                                                              |           |
| 55 |                            |     |                                                                                                                                                                                                                                                                                                                                                                                                              |           |
| 56 |                            |     |                                                                                                                                                                                                                                                                                                                                                                                                              |           |
| 57 |                            |     |                                                                                                                                                                                                                                                                                                                                                                                                              |           |
| 58 |                            |     |                                                                                                                                                                                                                                                                                                                                                                                                              |           |
| 59 |                            |     |                                                                                                                                                                                                                                                                                                                                                                                                              |           |
| 60 |                            |     |                                                                                                                                                                                                                                                                                                                                                                                                              |           |

|    |                                 |     |                                                         |    |
|----|---------------------------------|-----|---------------------------------------------------------|----|
| 1  |                                 |     |                                                         |    |
| 2  | Harms                           | 22  | Plans for collecting, assessing, reporting, and         | 14 |
| 3  |                                 |     | managing solicited and spontaneously reported           |    |
| 4  |                                 |     | adverse events and other unintended effects of trial    |    |
| 5  |                                 |     | interventions or trial conduct                          |    |
| 6  |                                 |     |                                                         |    |
| 7  | Auditing                        | 23  | Frequency and procedures for auditing trial conduct,    | 14 |
| 8  |                                 |     | if any, and whether the process will be independent     |    |
| 9  |                                 |     | from investigators and the sponsor                      |    |
| 10 |                                 |     |                                                         |    |
| 11 |                                 |     |                                                         |    |
| 12 |                                 |     |                                                         |    |
| 13 | <b>Ethics and dissemination</b> |     |                                                         |    |
| 14 |                                 |     |                                                         |    |
| 15 | Research ethics                 | 24  | Plans for seeking research ethics                       | 16 |
| 16 | approval                        |     | committee/institutional review board (REC/IRB)          |    |
| 17 |                                 |     | approval                                                |    |
| 18 |                                 |     |                                                         |    |
| 19 |                                 |     |                                                         |    |
| 20 | Protocol                        | 25  | Plans for communicating important protocol              | 16 |
| 21 | amendments                      |     | modifications (eg, changes to eligibility criteria,     |    |
| 22 |                                 |     | outcomes, analyses) to relevant parties (eg,            |    |
| 23 |                                 |     | investigators, REC/IRBs, trial participants, trial      |    |
| 24 |                                 |     | registries, journals, regulators)                       |    |
| 25 |                                 |     |                                                         |    |
| 26 |                                 |     |                                                         |    |
| 27 | Consent or                      | 26a | Who will obtain informed consent or assent from         | 10 |
| 28 | assent                          |     | potential trial participants or authorised surrogates,  |    |
| 29 |                                 |     | and how (see Item 32)                                   |    |
| 30 |                                 |     |                                                         |    |
| 31 |                                 | 26b | Additional consent provisions for collection and use    |    |
| 32 |                                 |     | of participant data and biological specimens in         |    |
| 33 |                                 |     | ancillary studies, if applicable                        |    |
| 34 |                                 |     |                                                         |    |
| 35 |                                 |     | - <i>Not included in the manuscript but specified</i>   |    |
| 36 |                                 |     | <i>in the HREC approved study protocol</i>              |    |
| 37 |                                 |     |                                                         |    |
| 38 | Confidentiality                 | 27  | How personal information about potential and            | 14 |
| 39 |                                 |     | enrolled participants will be collected, shared, and    |    |
| 40 |                                 |     | maintained in order to protect confidentiality before,  |    |
| 41 |                                 |     | during, and after the trial                             |    |
| 42 |                                 |     |                                                         |    |
| 43 |                                 |     |                                                         |    |
| 44 | Declaration of                  | 28  | Financial and other competing interests for principal   | 18 |
| 45 | interests                       |     | investigators for the overall trial and each study site |    |
| 46 |                                 |     |                                                         |    |
| 47 | Access to data                  | 29  | Statement of who will have access to the final trial    | 16 |
| 48 |                                 |     | dataset, and disclosure of contractual agreements       |    |
| 49 |                                 |     | that limit such access for investigators                |    |
| 50 |                                 |     |                                                         |    |
| 51 |                                 |     |                                                         |    |
| 52 | Ancillary and                   | 30  | Provisions, if any, for ancillary and post-trial care,  | 16 |
| 53 | post-trial care                 |     | and for compensation to those who suffer harm from      |    |
| 54 |                                 |     | trial participation                                     |    |
| 55 |                                 |     |                                                         |    |
| 56 |                                 |     |                                                         |    |
| 57 |                                 |     |                                                         |    |
| 58 |                                 |     |                                                         |    |
| 59 |                                 |     |                                                         |    |
| 60 |                                 |     |                                                         |    |

|                                                                                                                         |                            |     |                                                                                                                                                                                                                                                                                             |    |
|-------------------------------------------------------------------------------------------------------------------------|----------------------------|-----|---------------------------------------------------------------------------------------------------------------------------------------------------------------------------------------------------------------------------------------------------------------------------------------------|----|
| 1<br>2<br>3<br>4<br>5<br>6<br>7<br>8<br>9<br>10<br>11<br>12<br>13<br>14<br>15<br>16<br>17<br>18<br>19<br>20<br>21<br>22 | Dissemination policy       | 31a | Plans for investigators and sponsor to communicate trial results to participants, healthcare professionals, the public, and other relevant groups (eg, via publication, reporting in results databases, or other data sharing arrangements), including any publication restrictions         | 16 |
|                                                                                                                         |                            | 31b | Authorship eligibility guidelines and any intended use of professional writers<br>- <i>Not included in the manuscript but specified in the HREC approved study protocol</i>                                                                                                                 |    |
|                                                                                                                         |                            | 31c | Plans, if any, for granting public access to the full protocol, participant-level dataset, and statistical code<br>- <i>Not included in the manuscript but specified in the HREC approved study protocol</i>                                                                                |    |
| 23                                                                                                                      | <b>Appendices</b>          |     |                                                                                                                                                                                                                                                                                             |    |
| 24<br>25<br>26<br>27<br>28<br>29                                                                                        | Informed consent materials | 32  | Model consent form and other related documentation given to participants and authorised surrogates<br>- <i>Not included in the manuscript but specified in the HREC approved study protocol</i>                                                                                             |    |
| 30<br>31<br>32<br>33<br>34<br>35<br>36<br>37                                                                            | Biological specimens       | 33  | Plans for collection, laboratory evaluation, and storage of biological specimens for genetic or molecular analysis in the current trial and for future use in ancillary studies, if applicable<br>- <i>Not included in the manuscript but specified in the HREC approved study protocol</i> |    |

\*It is strongly recommended that this checklist be read in conjunction with the SPIRIT 2013 Explanation & Elaboration for important clarification on the items. Amendments to the protocol should be tracked and dated. The SPIRIT checklist is copyrighted by the SPIRIT Group under the Creative Commons "[Attribution-NonCommercial-NoDerivs 3.0 Unported](https://creativecommons.org/licenses/by-nc-nd/3.0/)" license.
